# Supplementary material
Source: MDPI journal article supplement (https://www.mdpi.com/1424-8247/14/9/870)
Supplement: s1 [file s1]

## **SUPPLEMENTARY MATERIAL**

**Naproxen based 1,3,4-oxadiazole derivatives as EGFR inhibitors: Design, Synthesis, Anticancer, and Computational Studies**

## S1. Characterization data of final compounds 8-16 and 19-26

### 4-((5-((S)-1-(2-methoxynaphthalen-6-yl)ethyl)-1,3,4-oxadiazol-2-ylthio)methyl)-1-(4-fluorophenyl)-1H-1,2,3-triazole (8)

M.p: 99-100; yield:70%; IR ( $\nu$ ,  $\text{cm}^{-1}$ ): 3086, 2939, 1630, 1604, 1592, 1483, 1460, 1390, 1260, 1227, 1213, 1151, 1067, 1041, 1027, 864, 814, 780;  $^1\text{H}$  NMR (850 MHz,  $\text{CDCl}_3$ ):  $\delta$  1.83 (d, 3H,  $-\text{CH}_3$ ), 3.93 (s, 3H,  $\text{O}-\text{CH}_3$ ), 4.46 (brs, 1H,  $-\text{CH}$ ), 4.60 (s, 2H,  $\text{S}-\text{CH}_2$ ), 7.11 (d,  $J = 7.6$  Hz, 1H,  $1 \times \text{CH}$ ), 7.16 (dd,  $J = 4.56, 8.50$  Hz, 1H,  $1 \times \text{CH}$ ), 7.20 (t,  $J = 8.50$  Hz, 2H,  $2 \times \text{CH}$ ), 7.37 (d,  $J = 8.50$  Hz, 1H,  $1 \times \text{CH}$ ), 7.65-7.72 (m, 5H,  $5 \times \text{CH}$ ), 8.26 (s, 1H,  $1 \times \text{CH}$ ).  $^{13}\text{C}$  NMR (213 MHz,  $\text{CDCl}_3$ ):  $\delta$  19.24, 26.64, 37.50, 55.35, 105.61, 116.72, 116.83, 119.34, 122.77, 125.72, 125.94, 127.61, 129.31, 133.90, 134.75, 157.93, 161.87, 163.04. ESI MS: 462  $[\text{M}+\text{H}]^+$   $\text{C}_{24}\text{H}_{20}\text{N}_5\text{O}_2\text{S}$ (Calcd): C, 62.46; H, 4.37; N, 15.17; O, 6.93; S, 6.95. Obsd:C,62.44, H, 4.38; N,15.19; O, 6.96; S, 6.94

### 4-((5-((S)-1-(2-methoxynaphthalen-6-yl)ethyl)-1,3,4-oxadiazol-2-ylthio)methyl)-1-(2,4-difluorophenyl)-1H-1,2,3-triazole (9)

M.p: 119-120, yield: 72%; IR ( $\nu$ ,  $\text{cm}^{-1}$ ): 3090, 2985, 1605, 1575, 1506, 1518, 1476, 1456, 1263, 1177, 1146, 1105, 1088, 1045, 958, 855, 823, 771;  $^1\text{H}$  NMR (850 MHz,  $\text{CDCl}_3$ ):  $\delta$  1.83 (d,  $J = 7.60$  Hz, 3H,  $-\text{CH}_3$ ), 3.93 (s, 3H,  $-\text{O}-\text{CH}_3$ ), 4.47 (brs, 1H,  $-\text{CH}$ ), 4.61 (brs, 2H,  $-\text{S}-\text{CH}_2-$ ), 7.05-7.06 (m, 2H,  $2 \times \text{CH}$ ), 7.11 (d,  $J = 7.60$  Hz, 1H,  $1 \times \text{CH}$ ), 7.17 (d,  $J = 7.60$  Hz, 1H,  $1 \times \text{CH}$ ), 7.37-7.38 (m, 1H,  $1 \times \text{CH}$ ), 7.67-7.72 (m, 3H,  $3 \times \text{CH}$ ), 7.85 (d,  $J = 8.50$  Hz, 1H,  $1 \times \text{CH}$ ), 8.34 (s, 1H,  $1 \times \text{CH}$ ).  $^{13}\text{C}$  NMR (213 MHz,  $\text{CDCl}_3$ ):  $\delta$  19.27, 26.62, 37.49, 55.34, 105.34, 105.45, 105.60, 112.54, 112.64, 119.31, 125.73, 125.92, 127.59, 128.86, 129.31, 133.89, 134.79, 157.90, 161.98, 163.10. ESI MS: 480  $[\text{M}+\text{H}]^+$   $\text{C}_{24}\text{H}_{19}\text{N}_5\text{O}_2\text{S}$ (Calcd): C, 60.12; H, 3.99; N, 14.61; O, 6.67; S, 6.69. Obsd:C,60.09, H, 4.01; N,14.58; O, 6.65; S, 6.67

### 4-((5-((S)-1-(2-methoxynaphthalen-6-yl)ethyl)-1,3,4-oxadiazol-2-ylthio)methyl)-1-(2-chlorophenyl)-1H-1,2,3-triazole (10)

M.p: 90-92; yield:82 %; IR( $\nu$ ,  $\text{cm}^{-1}$ ): 3082, 2938, 1605, 1593, 1571, 1481, 1462, 1394, 1263, 1177, 1144, 1069, 1043, 1027, 895, 857, 784, 676;  $^1\text{H}$  NMR (850 MHz,  $\text{CDCl}_3$ ):  $\delta$  1.84 (d,  $J = 7.61$  Hz, 3H,  $\text{CH}_3$ ), 3.93 (s, 3H,  $-\text{OCH}_3$ ), 4.47 (brs, 1H,  $-\text{CH}$ ), 4.60 (s, 2H,  $-\text{S}-\text{CH}_2-$ ), 7.11 (d,  $J = 8.50$  Hz, 1H,  $1 \times \text{CH}$ ), 7.16 (d,  $J = 7.60$  Hz, 1H,  $1 \times \text{CH}$ ), 7.32-7.78 (m, 8H,  $8 \times \text{CH}$ ), 8.33 (s, 1H,  $1 \times \text{CH}$ ).  $^{13}\text{C}$  NMR (213 MHz,  $\text{CDCl}_3$ ):  $\delta$  19.22, 26.61, 37.51, 55.35, 105.61, 118.78, 119.34, 121.01, 125.72, 125.94, 127.62, 128.86, 128.93, 129.30, 130.90, 133.90,

134.73, 135.71, 157.91, 161.48, 162.63. ESI MS: 478 [M+H]<sup>+</sup>, 480 [M+H+2]<sup>+</sup> C<sub>24</sub>H<sub>20</sub>N<sub>5</sub>O<sub>2</sub>S(Calcd): C, 60.31; H, 4.22; N, 14.65; O, 6.69; S, 6.71. Obsd: C,60.28, H, 4.24; N,14.63; O, 6.73; S, 6.72

**4-((5-((S)-1-(2-methoxynaphthalen-6-yl)ethyl)-1,3,4-oxadiazol-2-ylthio)methyl)-1-(3-chlorophenyl)-1H-1,2,3-triazole (11)**

Semisolid; yield:73 %; IR(v, cm<sup>-1</sup>): 3078, 2935, 1604, 1581, 1576, 1489, 1651, 1390, 1261, 1114, 1064, 857; <sup>1</sup>H NMR (850 MHz, CDCl<sub>3</sub>): δ 1.83 (d, J = 8.50 Hz, 3H, -CH<sub>3</sub>), 3.93 (s, 3H, -OCH<sub>3</sub>), 4.45 (q, J = 8.50 Hz, 1H, C-H), 4.61 (s, 2H, -S-CH<sub>2</sub>-), 7.11 (s, 1H, Ar-H), 7.15-7.16 (m, 1H, 1 × CH), 7.36 (d, J = 8.5Hz, 1H, 1 × CH), 7.42-7.44 (m, 1H, 1 × CH), 7.46 (t, J = 8.5 Hz, 1H, 1 × CH), 7.56-7.57 (m, 2H, 2 × CH), 7.67 (s, 1H, 1 × CH), 7.70-7.71 (m, 2H, 2 × CH), 8.10 (s, 1H, 1 × CH). <sup>13</sup>C NMR (213 MHz, CDCl<sub>3</sub>): δ 19.34, 26.17, 37.48, 55.34, 105.62, 119.32, 130.75, 133.34, 134.68, 134.87, 142.70, 157.75, 163.99. ESI MS: 478 [M+H]<sup>+</sup>, 480 [M+H+2]<sup>+</sup> C<sub>24</sub>H<sub>20</sub>N<sub>5</sub>O<sub>2</sub>S(Calcd): C, 60.31; H, 4.22; N, 14.65; O, 6.69; S, 6.71. Obsd:C, 60.30; H, 4.23; N, 14.64; O, 6.67; S,6.73

**4-((5-((S)-1-(2-methoxynaphthalen-6-yl)ethyl)-1,3,4-oxadiazol-2-ylthio)methyl)-1-(2,4-dichlorophenyl)-1H-1,2,3-triazole (12)**

M.p: 102-103; yield:80%; IR (v, cm<sup>-1</sup>): 3050, 2991, 2938, 1604, 1570, 1497, 1474, 1660, 1393, 1262, 1229, 1143, 1119, 1071, 1039, 1026, 894, 857, 822; <sup>1</sup>H NMR (850 MHz, CDCl<sub>3</sub>): δ 1.84 (d, J = 8.50 Hz, 3H, -CH<sub>3</sub>), 3.93 (s, 3H, -OCH<sub>3</sub>), 4.47 (brs, s, 1H, C-H), 4.61 (s, 2H, -S-CH<sub>2</sub>-), 7.11 (d, J = 7.60 Hz, 1H, 1 × CH), 7.15-7.17 (m, 1H, 1 × CH), 7.37 (d, J =8.5 Hz, 1H, 1 × CH), 7.41 (d, J = 7.6 Hz, 1H, 1 × CH), 7.50 (d, J = 8.5Hz, 1H, 1 × CH), 7.59 (s, 1H, 1 × CH), 7.67 (s, 1H, 1 × CH), 7.69-7.71 (m, 2H, 1 × CH), 8.26 (s, 1H, 1 × CH). <sup>13</sup>C NMR (213 MHz, CDCl<sub>3</sub>): δ 19.22, 26.63, 37.48, 55.35, 105.59, 119.33, 125.71, 125.92, 127.61, 128.26, 128.30, 128.85, 129.29, 130.62, 133.89, 136.35, 157.91, 160.34, 163.70. ESI MS: 512 [M+H]<sup>+</sup>, 514 [M+H+2]<sup>+</sup> C<sub>24</sub>H<sub>19</sub>N<sub>5</sub>O<sub>2</sub>S(Calcd): C, 56.26; H, 3.74; N, 13.67; O, 6.24; S, 6.26. Obsd: C,56.29, H, 3.70; N,13.65; O, 6.28; S, 6.27

**4-((5-((S)-1-(2-methoxynaphthalen-6-yl)ethyl)-1,3,4-oxadiazol-2-ylthio)methyl)-1-(3-bromophenyl)-1H-1,2,3-triazole (13)**

M.p: 118-120; yield:86%; IR (v, cm<sup>-1</sup>): 3086, 2939, 1604, 1504, 1483, 1461,1439, 1260, 1237, 1213, 1150, 1067, 1041, 1027, 923, 889, 865, 814, 780, 769, 674; <sup>1</sup>H NMR (850 MHz, CDCl<sub>3</sub>): δ1.84 (d, J = 8.51 Hz, 3H, -CH<sub>3</sub>), 3.93 (s, 3H, -OCH<sub>3</sub>),4.48 (brs, 1H, CH), 4.61 (s, 2H, S-CH<sub>2</sub>). 7.11-17 (m, 2H, 2 × CH), 7.37-7.39 (m, 2H, 2 × CH), 7.56-7.72 (m, 5H, 5 × CH), 7.93 (s, 1H, 1 × CH), 8.29 (s, 1H, 1 × CH). <sup>13</sup>C

NMR (213 MHz, CDCl<sub>3</sub>):  $\delta$  19.23, 26.57, 37.51, 55.35, 105.61, 119.34, 123.42, 123.82, 125.72, 125.96, 127.62, 129.30, 131.14, 131.92, 133.90, 134.67, 157.91, 160.35, 163.72. ESI MS: 522 [M+H]<sup>+</sup>, 524 [M+H+2]<sup>+</sup> C<sub>24</sub>H<sub>20</sub>N<sub>5</sub>O<sub>2</sub>S(Calcd): C, 55.18; H, 3.86; N, 13.41; O, 6.13; S, 6.14. Obsd: C,55.15, H, 3.88; N,13.40; O, 6.17; S, 6.15

**4-((5-((S)-1-(2-methoxynaphthalen-6-yl)ethyl)-1,3,4-oxadiazol-2-ylthio)methyl)-1-(4-bromophenyl)-1H-1,2,3-triazole (14)**

M.p: 160-161; yield:81%; IR ( $\nu$ , cm<sup>-1</sup>): 3085, 2938, 1606, 1578, 1496, 1486, 1459, 1393, 1260, 1228, 1215, 1192, 1154, 1067, 1029, 987, 813; <sup>1</sup>H NMR (850 MHz, CDCl<sub>3</sub>):  $\delta$  1.75 (brd s, 3H, -CH<sub>3</sub>), 3.84 (s, 3H, -O-CH<sub>3</sub>), 4.37 (brs, 1H, -CH), 4.51 (s, 2H, S-CH<sub>2</sub>-), 7.02 (s, 1H, 1  $\times$  CH), 7.08 (d,  $J$  = 8.5 Hz, 1H, 1  $\times$  CH), 7.29 (d,  $J$  = 8.5 Hz, 1H, 1  $\times$  CH), 7.48 (d,  $J$  = 8.5 Hz, 2H, 2  $\times$  CH), 7.53 (d,  $J$  = 8.5Hz, 2H, 2  $\times$  CH), 7.59 (s, 1H, 1  $\times$  CH), 7.61-7.63 (m, 2H, 2  $\times$  CH), 8.20 (s, 1H, 1  $\times$  CH). <sup>13</sup>C NMR (213 MHz, CDCl<sub>3</sub>):  $\delta$  19.20, 26.93, 37.50, 55.36, 105.60, 119.36, 122.51, 125.72, 125.94, 127.62, 129.31, 132.98, 133.90, 134.68, 157.93, 159.46, 163.40. ESI MS: 522 [M+H]<sup>+</sup>, 524 [M+H+2]<sup>+</sup> C<sub>24</sub>H<sub>20</sub>N<sub>5</sub>O<sub>2</sub>S(Calcd): C, 55.18; H, 3.86; N, 13.41; O, 6.13; S, 6.14. Obsd: C,55.15, H, 3.87; N,13.39; O, 6.15; S, 6.13.

**2-(4-((5-((S)-1-(2-methoxynaphthalen-6-yl)ethyl)-1,3,4-oxadiazol-2-ylthio)methyl)-1H-1,2,3-triazol-1-yl)phenol (15)**

M.p: 90-92; yield: 70%; IR ( $\nu$ , cm<sup>-1</sup>): 3150, 3045, 2937, 1605, 1506, 1480, 1457,1393, 1262, 1228, 1157, 1044, 1027, 895, 856, 822, 753; <sup>1</sup>H NMR (850 MHz, CDCl<sub>3</sub>):  $\delta$  1.85 (brs, 3H, -CH<sub>3</sub>), 3.93 (s, 3H, -OCH<sub>3</sub>), 4.47 (brs, 1H, -CH), 4.62 (s, 2H, S-CH<sub>2</sub>-), 7.00 (t,  $J$  = 8.50 Hz, 1H, 1  $\times$  CH), 7.12 (s, 1H, 1  $\times$  CH), 7.17 (d,  $J$  = 8.50 Hz, 1H, 1  $\times$  CH), 7.19 (d,  $J$  = 8.50 Hz, 1H, 1  $\times$  CH), 7.32 (t,  $J$  = 8.50 Hz, 1H, 1  $\times$  CH), 7.37-7.38 (m, 2H, 2  $\times$  CH), 7.68-7.72 (m, 3H, 3  $\times$  CH), 8.46 (s, 1H, 1  $\times$  CH), 9.70 (s, 1H, Ar-OH). <sup>13</sup>C NMR (213 MHz, CDCl<sub>3</sub>):  $\delta$  19.22, 25.84, 37.52, 55.35, 105.61, 119.35, 119.49, 120.41, 125.71, 125.96, 127.63, 128.30, 129.30, 129.85, 133.92, 134.68, 149.20, 157.93, 162.15, 164.50. ESI MS: 460 [M-H]<sup>+</sup>, C<sub>24</sub>H<sub>21</sub>N<sub>5</sub>O<sub>3</sub>S(Calcd): C, 62.73; H, 4.61; N, 15.24; O, 10.45; S, 6.98. Obsd:C,62.71, H, 4.63; N,15.22; O, 10.49; S, 6.99.

**3-(4-((5-((S)-1-(2-methoxynaphthalen-6-yl)ethyl)-1,3,4-oxadiazol-2-ylthio)methyl)-1H-1,2,3-triazol-1-yl)benzoic acid (16)**

M.p: 184-185; yield:89%; IR ( $\nu$ , cm<sup>-1</sup>): 3155, 3085, 2939, 1690, 1633, 1606, 1593, 1483, 1459, 1392, 1264, 1152, 1067, 813; <sup>1</sup>H NMR (850 MHz, CDCl<sub>3</sub>):  $\delta$  1.84 (d,  $J$  = 7.6 Hz, 3H, CH-CH<sub>3</sub>), 3.92 (s, -OCH<sub>3</sub>, 3H), 4.47-4.49 (m, 1H, C-H), 4.64 (s, 2H, S-CH<sub>2</sub>-), 7.10 (d,  $J$  = 7.6

Hz, 1H, 1 × CH), 7.15 (s, 1H, 1 × CH), 7.38 (s, 1H, 1 × CH), 7.64-7.72 (m, 4H, 4 × CH), 8.04 (d,  $J = 8.50$  Hz, 1H, 1 × CH), 8.18 (d,  $J = 8.50$  Hz, 1H, 1 × CH), 8.37 (s, 1H, 1 × CH), 8.44 (s, 1H, Ar-COOH).  $^{13}\text{C}$  NMR (213 MHz,  $\text{CDCl}_3$ ):  $\delta$  19.25, 26.64, 37.49, 55.34, 105.60, 119.32, 121.78, 125.43, 125.71, 127.63, 128.30, 129.31, 130.31, 131.29, 133.91, 134.67, 137.15, 157.90, 160.00, 163.31, 168.48. ESI MS: 486  $[\text{M}-\text{H}]^+$ ,  $\text{C}_{25}\text{H}_{21}\text{N}_5\text{O}_4\text{S}$ (Calcd): C, 61.59; H, 4.34; N, 14.36; O, 13.13; S, 6.58. Obsd: C, 61.57; H, 4.35; N, 14.34; O, 13.15; S, 6.60.

**2-(5-((S)-1-(2-methoxynaphthalen-6-yl)ethyl)-1,3,4-oxadiazol-2-ylthio)-N-(4-fluorophenyl) acetamide (19)**

M.p: 220-221; yield:71%; IR ( $\nu$ ,  $\text{cm}^{-1}$ ): 3195 (N-H), 3050, 2966, 1734, 1640, 1592, 1509, 1483, 1377, 1247, 1225, 1198, 1159, 1032, 939, 882;  $^1\text{H}$  NMR (850 MHz,  $\text{CDCl}_3$ ):  $\delta$  1.68 (d,  $J = 8.50$  Hz, 3H,  $\text{CH}_3$ ), 3.93-3.97 (m, 5H, -O- $\text{CH}_3$ , -S- $\text{CH}_2$ -), 4.06 (q,  $J = 8.50$  Hz, 1H, -CH), 7.02 (d,  $J = 8.5\text{Hz}$ , 1H, 1 × CH), 7.10 (s, 1H, 1 × CH), 7.15 (d,  $J = 8.5\text{Hz}$ , 2H, 2 × CH), 7.19-7.21 (m, 2H, 2 × CH), 7.42 (d,  $J = 8.50\text{Hz}$ , 1H, 1 × CH), 7.58 (t,  $J = 8.50$  Hz, 2H, 2 × CH), 7.72-7.77 (m, 2H, 2 × CH), 9.35(s, 1H, N-H).  $^{13}\text{C}$  NMR (213 MHz,  $\text{CDCl}_3$ ):  $\delta$  18.84, 33.05, 42.26, 55.34, 105.56, 105.68, 116.49, 116.60, 118.86, 119.40, 125.86, 126.61, 128.81, 129.66, 129.88, 129.93, 133.42, 135.20, 136.21, 157.52, 162.05, 163.21, 169.32, 175.49. ESI MS: 438  $[\text{M}+\text{H}]^+$ ,  $\text{C}_{23}\text{H}_{20}\text{N}_3\text{O}_3\text{S}$ (Calcd): C, 63.14; H, 4.61; N, 9.60; O, 10.97; S, 7.33. Obsd: C, 63.15; H, 4.60; N, 9.59; O, 10.98; S, 7.34

**2-(5-((S)-1-(2-methoxynaphthalen-6-yl)ethyl)-1,3,4-oxadiazol-2-ylthio)-N-(2,4-difluorophenyl)acetamide (20)**

M.p: 102-103; yield:89%; IR ( $\nu$ ,  $\text{cm}^{-1}$ ): 3150 (N-H), 3087, 2940, 1681, 1606, 1569, 1505, 1483, 1470, 1260, 1144, 1028, 850, 813;  $^1\text{H}$  NMR (850 MHz,  $\text{CDCl}_3$ ):  $\delta$  1.84 (d,  $J = 8.50$  Hz, 3H, - $\text{CH}_3$ ), 3.94-4.06 (m, 3H, O- $\text{CH}_3$ , 2H, -S- $\text{CH}_2$ -), 4.49 (q,  $J = 8.50$  Hz, 1H, -CH), 6.95-6.97 (m, 1H, 1 × CH), 7.13 (d, 7.60 Hz, 1H, 1 × CH), 7.17-7.19 (m, 1H, 1 × CH), 7.36-7.37 (m, 1H, 1 × CH), 7.52 (t,  $J = 8.50$  Hz, 1H, 1 × CH), 7.67 (s, 1H, 1 × CH), 7.71-7.73 (m, 2H, 2 × CH), 8.26 (s, 1H, 1 × CH), 9.30 (s, 1H, N-H).  $^{13}\text{C}$  NMR (213 MHz,  $\text{CDCl}_3$ ):  $\delta$  19.25, 29.30, 37.52, 55.37, 105.82, 119.40, 122.77, 125.59, 125.91, 127.89, 128.94, 129.31, 133.94, 134.56, 157.98, 164.38, 165.89, 171.03. ESI MS: 456  $[\text{M}+\text{H}]^+$ ,  $\text{C}_{23}\text{H}_{19}\text{N}_3\text{O}_3\text{S}$ (Calcd): C, 60.65; H, 4.20; N, 9.23; O, 10.54; S, 7.04. Obsd: C, 60.64; H, 4.21; N, 9.24; O, 10.55; S, 7.03

**2-(5-((S)-1-(2-methoxynaphthalen-6-yl)ethyl)-1,3,4-oxadiazol-2-ylthio)-N-(3-chlorophenyl) acetamide (21)**

M.p: 82-83; yield: 90%; IR ( $\nu$ ,  $\text{cm}^{-1}$ ): 3148, 3050, 2934, 1634, 1593, 1480, 1263, 1158, 1029, 852;  $^1\text{H}$  NMR (850 MHz,  $\text{CDCl}_3$ ):  $\delta$  1.86 (d,  $J = 8.50$  Hz, 3H,  $\text{CH}_3$ ), 3.90-3.95 (m, 5H,  $-\text{O}-\text{CH}_3$ ,  $-\text{S}-\text{CH}_2-$ ), 4.49 (q,  $J = 8.50$  Hz, 1H,  $-\text{C}-\text{H}$ ), 7.10 (d,  $J = 8.50$  Hz, 1H,  $1 \times \text{CH}$ ), 7.13 (d,  $J = 8.5$  Hz, 1H,  $1 \times \text{CH}$ ), 7.18 (d,  $J = 8.5$  Hz, 1H,  $1 \times \text{CH}$ ), 7.24 (t,  $J = 8.50$  Hz,  $1 \times \text{CH}$ ), 7.33 (s, 1H,  $1 \times \text{CH}$ ), 7.38 (d,  $J = 8.5\text{Hz}$ , 1H,  $1 \times \text{CH}$ ), 7.69 (d,  $J = 8.5\text{Hz}$ , 2H,  $2 \times \text{CH}$ ), 7.72-7.75 (m, 2H,  $2 \times \text{CH}$ ), 9.47(s, 1H, N-H).  $^{13}\text{C}$  NMR (213 MHz,  $\text{CDCl}_3$ ):  $\delta$  19.21, 26.93, 37.55, 55.37, 105.64, 117.90, 119.44, 119.96, 124.65, 125.59, 126.00, 126.40, 127.78, 129.32, 129.96, 134.00, 134.67, 138.84, 158.00, 162.19, 165.64, 172.79. ESI MS: 454  $[\text{M}+\text{H}]^+$ , 456  $[\text{M}+\text{H}+2]^+$   $\text{C}_{23}\text{H}_{20}\text{N}_3\text{O}_3\text{S}$ (Calcd): C, 60.86; H, 4.44; N, 9.26; O, 10.57; S, 7.06. Obsd: C, 60.85, H, 4.45; N, 9.25; O, 10.58; S, 7.05

**2-(5-((S)-1-(2-methoxynaphthalen-6-yl)ethyl)-1,3,4-oxadiazol-2-ylthio)-N-(3-bromophenyl) acetamide (22)**

M.p: 129-130; yield: 90%; IR ( $\nu$ ,  $\text{cm}^{-1}$ ): 3111, 3040, 2933, 1671, 1595, 1539, 1471, 1456, 1263, 1214, 1028, 850;  $^1\text{H}$  NMR (850 MHz,  $\text{CDCl}_3$ ):  $\delta$  1.86 (d,  $J = 8.50$  Hz, 3H,  $-\text{CH}_3$ ), 3.92-3.94 (m, 5H,  $-\text{O}-\text{CH}_3$ ,  $-\text{S}-\text{CH}_2-$ ), 4.49 (q,  $J = 8.50$  Hz, 1H,  $-\text{CH}$ ), 7.13 (d,  $J = 8.5\text{Hz}$ , 1H,  $1 \times \text{CH}$ ), 7.17-7.19 (m, 2H,  $2 \times \text{CH}$ ), 7.25 (d,  $J = 8.5\text{Hz}$ , 1H,  $1 \times \text{CH}$ ), 7.38 (d,  $J = 8.5\text{Hz}$ , 1H,  $1 \times \text{CH}$ ), 7.43 (d,  $J = 8.5\text{Hz}$ , 1H,  $1 \times \text{CH}$ ), 7.69 (s, 1H,  $1 \times \text{CH}$ ), 7.72-7.75 (m, 2H,  $2 \times \text{CH}$ ), 7.84 (s, 1H,  $1 \times \text{CH}$ ), 9.45 (s, 1H,  $-\text{N}-\text{H}$ ).  $^{13}\text{C}$  NMR (213 MHz,  $\text{CDCl}_3$ ):  $\delta$  19.22, 26.14, 37.56, 55.37, 105.64, 118.40, 119.45, 122.65, 122.77, 125.60, 126.00, 127.60, 127.76, 128.87, 129.32, 130.26, 134.01, 134.38, 138.97, 159.45, 161.71, 163.15, 175.43. ESI MS: 498  $[\text{M}+\text{H}]^+$ , 500  $[\text{M}+\text{H}+2]^+$   $\text{C}_{23}\text{H}_{20}\text{N}_3\text{O}_3\text{S}$ (Calcd): C, 55.43; H, 4.04; N, 8.43; O, 9.63; S, 6.43. Obsd: C, 55.42, H, 4.06; N, 8.42; O, 9.62; S, 6.45

**2-(5-((S)-1-(2-methoxynaphthalen-6-yl)ethyl)-1,3,4-oxadiazol-2-ylthio)-N-(4-bromophenyl) acetamide (23)**

M.p: 148-149; yield: 71%; IR ( $\nu$ ,  $\text{cm}^{-1}$ ): 3101, 3041, 2935, 1675, 1525, 1405, 1263, 1025, 855;  $^1\text{H}$  NMR (850 MHz,  $\text{CDCl}_3$ ):  $\delta$  1.86 (d,  $J = 7.60$  Hz, 3H,  $-\text{CH}_3$ ), 3.92-3.94 (m, 5H,  $\text{O}-\text{CH}_3$ ,  $\text{S}-\text{CH}_2-$ ), 4.48 (q,  $J = 8.50$  Hz, 1H,  $-\text{CH}$ ), 7.13 (d,  $J = 8.50$ , 1H,  $1 \times \text{CH}$ ), 7.37 (d,  $J = 8.5\text{Hz}$ , 1H,  $1 \times \text{CH}$ ), 7.42 (d,  $J = 8.5\text{Hz}$ , 2H,  $2 \times \text{CH}$ ), 7.45 (d,  $J = 8.5\text{Hz}$ , 2H,  $2 \times \text{CH}$ ), 7.59 (t,  $J = 8.5\text{Hz}$ , 1H,  $1 \times \text{CH}$ ), 7.68 (s, 1H,  $1 \times \text{CH}$ ), 7.71-7.75 (m, 2H,  $1 \times \text{CH}$ ), 9.45 (s, 1H, N-H).  $^{13}\text{C}$  NMR (213 MHz,  $\text{CDCl}_3$ ):  $\delta$  19.22, 30.96, 37.54, 55.37, 105.64, 1117.18, 119.45, 121.43, 123.26, 125.58, 125.99, 126.89, 127.76, 128.86, 129.31, 129.62, 131.94, 132.72, 134.00, 134.36, 136.81, 158.01, 163.26, 165.51,

171.04. ESI MS: 498 [M+H]<sup>+</sup>, 500 [M+H+2]<sup>+</sup> C<sub>23</sub>H<sub>20</sub>N<sub>3</sub>O<sub>3</sub>S(Calcd): C, 55.43; H, 4.04; N, 8.43; O, 9.63; S, 6.43. Obsd: C, 55.44, H, 4.03; N, 8.44; O, 9.64; S, 6.45

**2-(5-((S)-1-(2-methoxynaphthalen-6-yl)ethyl)-1,3,4-oxadiazol-2-ylthio)-N-o-tolylacetamide (24)**

M.p: 109-110; yield:75%; IR (ν, cm<sup>-1</sup>): 3315, 2931, 1672, 1596, 1549, 1485, 1470, 1456, 1371, 1251, 1214, 1159, 1028, 850; <sup>1</sup>H NMR (850 MHz, CDCl<sub>3</sub>): δ 1.85 (d, J = 7.60 Hz, 3H, -CH-CH<sub>3</sub>), 2.27 (s, 3H, Ar-CH<sub>3</sub>), 3.94 (s, 3H, O-CH<sub>3</sub>), 4.0 (brs, 2H, -S-CH<sub>2</sub>-), 4.49 (q, J = 8.5Hz, 1H, C-H), 7.08 (t, J = 8.5Hz, 1H, 1 × CH), 7.13 (s, 1H, 1 × CH), 7.17-7.22 (m, 3H, 3 × CH), 7.36 (d, J = 8.5Hz, 1H, 1 × CH), 7.68 (s, 1H, 1 × CH), 7.71-7.74 (m, 2H, 2 × CH), 7.90 (d, J = 8.5Hz, 1H, 1 × CH), 8.91 (s, 1H, -N-H). <sup>13</sup>C NMR (213 MHz, CDCl<sub>3</sub>): δ 18.04, 19.24, 26.93, 37.51, 55.36, 105.64, 119.41, 122.46, 125.24, 125.58, 125.93, 126.67, 127.73, 128.88, 129.05, 129.32, 130.55, 133.97, 135.71, 158.25, 160.55, 163.01, 176.59. ESI MS: 434 [M+H]<sup>+</sup>, C<sub>24</sub>H<sub>23</sub>N<sub>3</sub>O<sub>3</sub>S(Calcd): C, 66.49; H, 5.35; N, 9.69; O, 11.07; S, 7.40. Obsd: C, 66.50, H, 5.34, N, 9.68; O, 11.09; S, 7.41

**2-(2-(5-((S)-1-(2-methoxynaphthalen-6-yl)ethyl)-1,3,4-oxadiazol-2-ylthio)acetamido)benzoic acid (25)**

M.p: 130-131; yield:68%; IR (ν, cm<sup>-1</sup>): 3150, 2976, 1690, 1684, 1605, 1576, 1483, 1470, 1393, 1262, 1228, 1214, 1152, 1028, 852, 767; <sup>1</sup>H NMR (850 MHz, CDCl<sub>3</sub>): δ 1.72 (d, J = 8.50 Hz, 3H, CH<sub>3</sub>), 3.92-3.94 (m, 5H, O-CH<sub>3</sub>, S-CH<sub>2</sub>-), 4.02-4.07 (m, 1H, -CH), 7.11-7.19 (m, 3H, 3 × CH), 7.42-7.54 (m, 3H, 3 × CH), 7.72-7.81 (m, 3H, 3 × CH), 7.84 (s, 1H, 1 × CH), 8.58 (s, 1H, NH), 10.71 (s, 1H, -COOH). <sup>13</sup>C NMR (213 MHz, CDCl<sub>3</sub>): δ 18.07, 33.93, 45.65, 55.38, 105.73, 119.52, 126.31, 127.00, 127.93, 129.03, 129.32, 133.99, 134.12, 135.64, 145.83, 158.04, 158.76, 160.18, 169.76, 174.15. ESI MS: 464 [M+H]<sup>+</sup>, C<sub>24</sub>H<sub>21</sub>N<sub>3</sub>O<sub>5</sub>S(Calcd): C, 62.19; H, 4.57; N, 9.07; O, 17.26; S, 6.92. Obsd: C, 62.20, H, 4.56, N, 9.08; O, 17.25; S, 6.93

**2-(5-((S)-1-(2-methoxynaphthalen-6-yl)ethyl)-1,3,4-oxadiazol-2-ylthio)-1-morpholino ethanone (26)**

M.p: 74-75; yield:70%; IR (ν, cm<sup>-1</sup>): 3050, 2936, 1633, 1605, 1481, 1457, 1392, 1263, 1228, 1149, 1068, 1027, 850, 812; <sup>1</sup>H NMR (850 MHz, CDCl<sub>3</sub>): δ 1.83 (d, J = 8.5 Hz, 3H, -CH<sub>3</sub>), 3.59 (t, J = 8.5Hz, 2H, -N-CH<sub>2</sub>-), 3.66 (t, J = 8.5Hz, 2H, N-CH<sub>2</sub>-), 3.70 (t, J = 8.5Hz, 2H, O-CH<sub>2</sub>-), 3.73 (t, J = 8.5Hz, 2H, O-CH<sub>2</sub>-), 3.94 (brs, 5H, O-CH<sub>3</sub>, S-CH<sub>2</sub>-), 4.48 (q, J = 8.5Hz, 1H, -CH), 7.14-7.19 (m, 3H, 3 × CH), 7.36-

7.39 (m, 1H, 1 × CH), 7.68 (s, 1H, 1 × CH), 7.72-7.75 (m, 1H, 1 × CH). <sup>13</sup>C NMR (213 MHz, CDCl<sub>3</sub>): δ 19.35, 37.69, 42.63, 46.54, 55.36, 66.46, 105.64, 119.32, 119.45, 125.55, 125.74, 127.62, 127.76, 129.34, 133.91, 134.85, 157.91, 162.83, 164.38, 174.52. ESI MS: 414 [M+H]<sup>+</sup>, C<sub>21</sub>H<sub>23</sub>N<sub>3</sub>O<sub>4</sub>S(Calcd): C, 61.00; H, 5.61; N, 10.16; O, 15.48; S, 7.75. Obsd: C, 60.01, H, 5.60; N, 10.17; O, 15.50; S, 7.73



**Table S1.** The calculated GCRD derived from frontier molecular orbitals for **8-11** and **19-26**

|           | $E_{\text{HOMO}}$ | $E_{\text{LUMO}}$ | $E_{\text{gap}}$ | IP   | EA   | $\eta$ | $\mu$ | S     | $\chi$ | $\omega$ | $\omega^\pm$ |
|-----------|-------------------|-------------------|------------------|------|------|--------|-------|-------|--------|----------|--------------|
| <b>8</b>  | -5.83             | -1.89             | -3.94            | 5.83 | 1.89 | 1.97   | -4.85 | 0.51  | 3.79   | -3.86    | 9.507        |
| <b>9</b>  | -5.71             | -1.89             | -3.82            | 5.71 | 1.89 | 1.91   | -4.75 | 0.52  | 3.78   | -3.80    | 9.450        |
| <b>10</b> | -5.69             | -1.82             | -3.87            | 5.69 | 1.82 | 1.94   | -4.73 | 0.52  | 3.65   | -3.76    | 9.175        |
| <b>11</b> | -5.67             | -2.04             | -3.64            | 5.67 | 2.04 | 1.82   | -4.76 | 0.55  | 4.08   | -3.86    | 10.097       |
| <b>12</b> | -5.72             | -2.00             | -3.72            | 5.72 | 2.00 | 1.86   | -4.79 | 0.54  | 4.01   | -3.86    | 9.959        |
| <b>13</b> | -5.67             | -2.06             | -3.61            | 5.67 | 2.06 | 1.80   | -4.77 | 0.55  | 4.14   | -3.86    | 10.207       |
| <b>14</b> | -5.82             | -2.03             | -3.79            | 5.82 | 2.03 | 1.90   | -4.88 | 0.53  | 4.07   | -3.93    | 10.105       |
| <b>15</b> | -6.11             | -1.80             | -4.31            | 6.11 | 1.80 | 2.16   | -5.03 | 0.46  | 3.63   | -3.96    | 9.234        |
| <b>16</b> | -1.87             | -0.58             | -1.29            | 1.87 | 0.58 | 0.64   | -1.55 | 1.55  | 1.16   | -1.22    | 2.940        |
| <b>19</b> | -5.90             | -1.52             | -4.38            | 5.90 | 1.52 | 2.19   | -4.81 | 0.46  | 3.15   | -3.71    | 8.154        |
| <b>20</b> | -5.77             | -1.61             | -4.15            | 5.77 | 1.61 | 2.08   | -4.73 | 0.48  | 3.28   | -3.69    | 8.400        |
| <b>21</b> | -6.07             | -1.70             | -4.38            | 6.07 | 1.70 | 2.19   | -4.98 | 0.46  | 3.45   | -3.89    | 8.841        |
| <b>22</b> | -5.92             | -1.76             | -4.16            | 5.92 | 1.76 | 2.08   | -4.88 | 0.48  | 3.55   | -3.84    | 9.015        |
| <b>23</b> | -5.89             | -1.51             | -4.38            | 5.89 | 1.51 | 5.13   | -4.79 | -0.21 | 0.01   | 3.32     | 9.958        |
| <b>24</b> | -5.88             | -1.53             | -4.35            | 5.88 | 1.53 | 2.18   | -4.79 | 0.46  | 3.15   | -3.70    | 8.148        |
| <b>25</b> | -1.57             | -0.20             | -1.37            | 1.57 | 0.20 | 0.68   | -1.23 | 1.46  | 0.57   | -0.89    | 1.592        |
| <b>26</b> | -5.70             | -1.34             | -4.36            | 5.70 | 1.34 | 2.18   | -4.61 | 0.46  | 2.84   | -3.52    | 7.445        |

Figure S1-S17:  $^1\text{H}$  NMR of compounds

3/29/2021 8:46:53 PM

|                        |                      |               |                                  |                        |                                      |
|------------------------|----------------------|---------------|----------------------------------|------------------------|--------------------------------------|
| Acquisition Time (sec) | 1.9268               | Comment       | Dr. Abdusattar Sampe_17-03_CDCL3 | Date                   | 28 Mar 2021 13:25:04                 |
| Date Stamp             | 28 Mar 2021 13:25:04 |               |                                  | File Name              | C:\Users\hp\Desktop\Naproxen NMR\NM1 |
| Frequency (MHz)        | 650.15               | Nucleus       | $^1\text{H}$                     | Number of Transients   | 32                                   |
| Original Points Count  | 32768                | Owner         | nmr                              | Points Count           | 32768                                |
| Receiver Gain          | 9.04                 | SW (cycles)   | 17006.80                         | Solvent                | CHLOROFORM-d                         |
| Spectrum Offset (Hz)   | 5250.0283            | Spectrum Type | STANDARD                         | Sweep Width (Hz)       | 17006.28                             |
|                        |                      |               |                                  | Temperature (degree C) | 24.999                               |

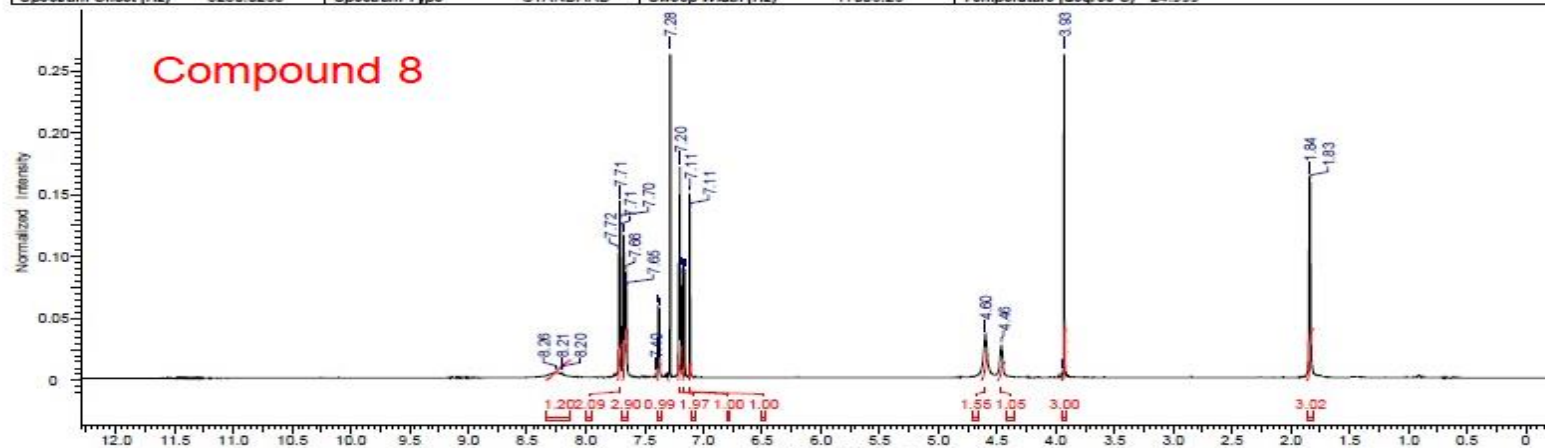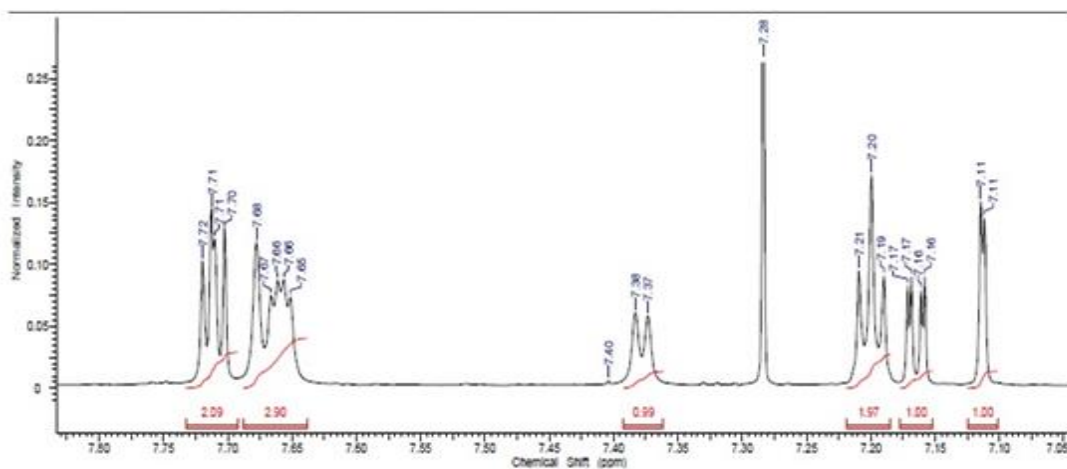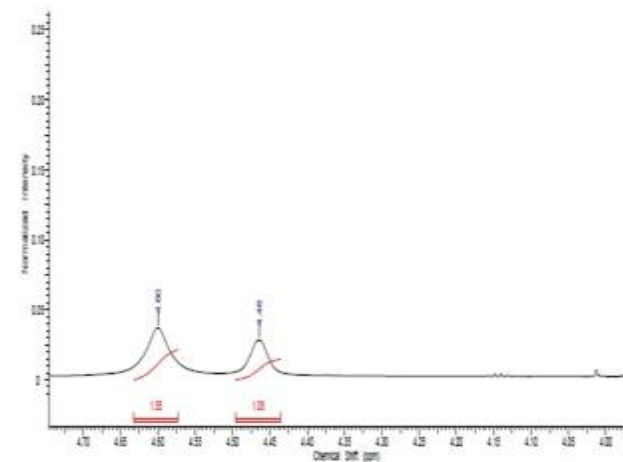

3/29/2021 11:45:17 PM

|                        |                      |                  |                                   |                                       |              |                        |        |
|------------------------|----------------------|------------------|-----------------------------------|---------------------------------------|--------------|------------------------|--------|
| Acquisition Time (sec) | 1.9268               | Comment          | Dr. Abdussattar Sampe 20-03 CDCL3 |                                       | Date         | 28 Mar 2021 16:05:04   |        |
| Date Stamp             | 28 Mar 2021 16:05:04 |                  | File Name                         | C:\Users\hpi\Desktop\Naproxen NMR\NM4 |              | 28-03-2021\50\fid      |        |
| Frequency (MHz)        | 850.15               | Nucleus          | 1H                                | Number of Transients                  | 32           | Origin                 | spect  |
| Original Points Count  | 32768                | Owner            | nmr                               | Points Count                          | 32768        | Pulse Sequence         | zg30   |
| Receiver Gain          | 12.46                | SW (cycles) (Hz) | 17006.80                          | Solvent                               | CHLOROFORM-d |                        |        |
| Spectrum Offset (Hz)   | 5250.0283            | Spectrum Type    | STANDARD                          | Sweep Width (Hz)                      | 17006.28     | Temperature (degree C) | 24.999 |

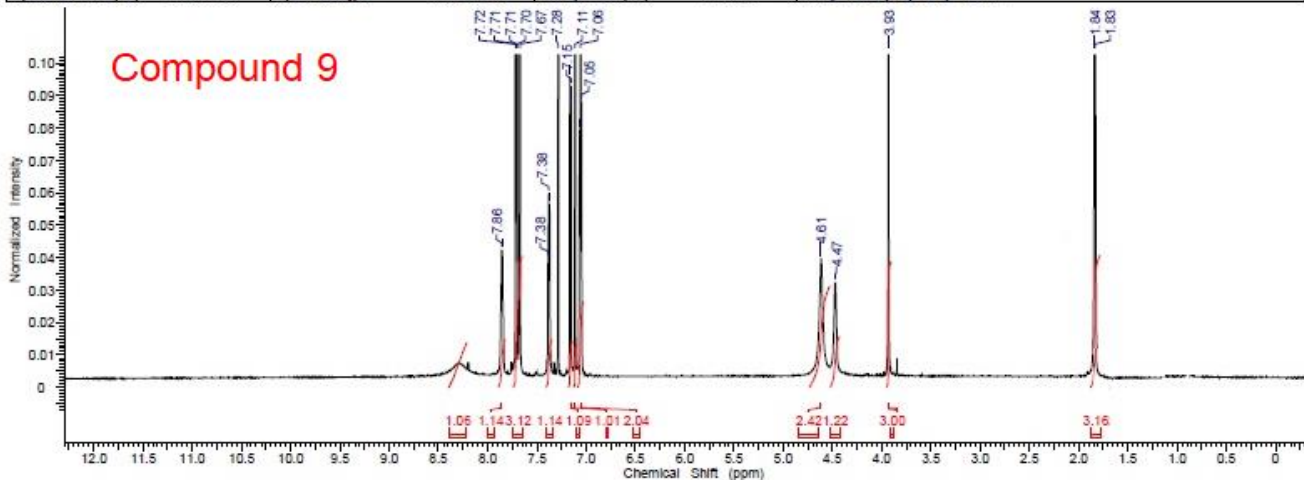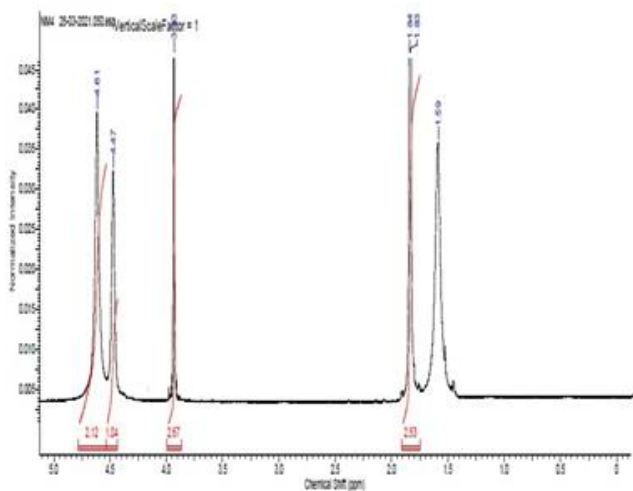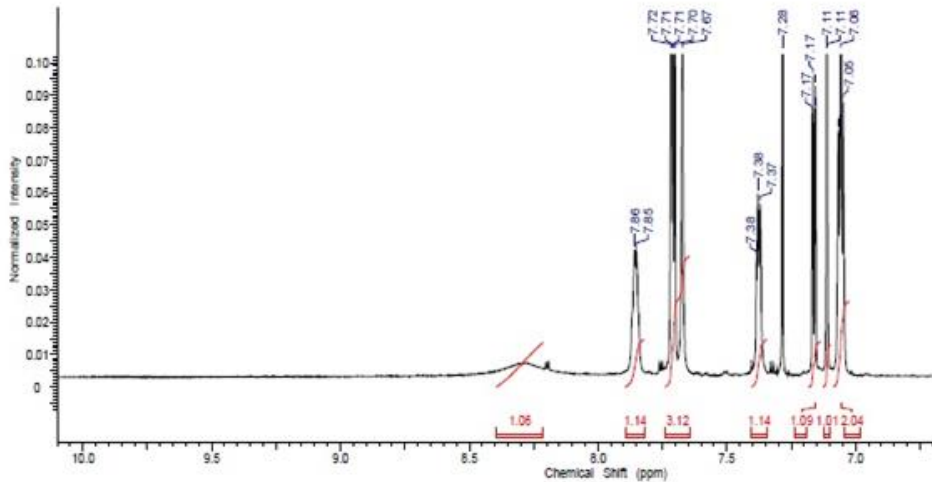

3/30/2021 1:33:23 AM

|                        |                      |                   |                                                         |                        |                      |
|------------------------|----------------------|-------------------|---------------------------------------------------------|------------------------|----------------------|
| Acquisition Time (sec) | 1.9268               | Comment           | Dr. Abdussattar Sampe 23-03 COCL3                       | Date                   | 28 Mar 2021 18:45:04 |
| Date Stamp             | 28 Mar 2021 18:45:04 | File Name         | C:\Users\hnp\Desktop\Naproxen NMR\NM7 28-03-2021\80.fid |                        |                      |
| Frequency (MHz)        | 850.15               | Nucleus           | <sup>1</sup> H                                          | Number of Transients   | 32                   |
| Original Points Count  | 32768                | Owner             | nmr                                                     | Points Count           | 32768                |
| Receiver Gain          | 12.46                | SW(cyclical) (Hz) | 17006.80                                                | Pulse Sequence         | zg30                 |
| Spectrum Offset (Hz)   | 5250.0283            | Spectrum Type     | STANDARD                                                | Sweep Width (Hz)       | 17006.28             |
|                        |                      |                   |                                                         | Temperature (degree C) | 25.001               |

## Compound 10

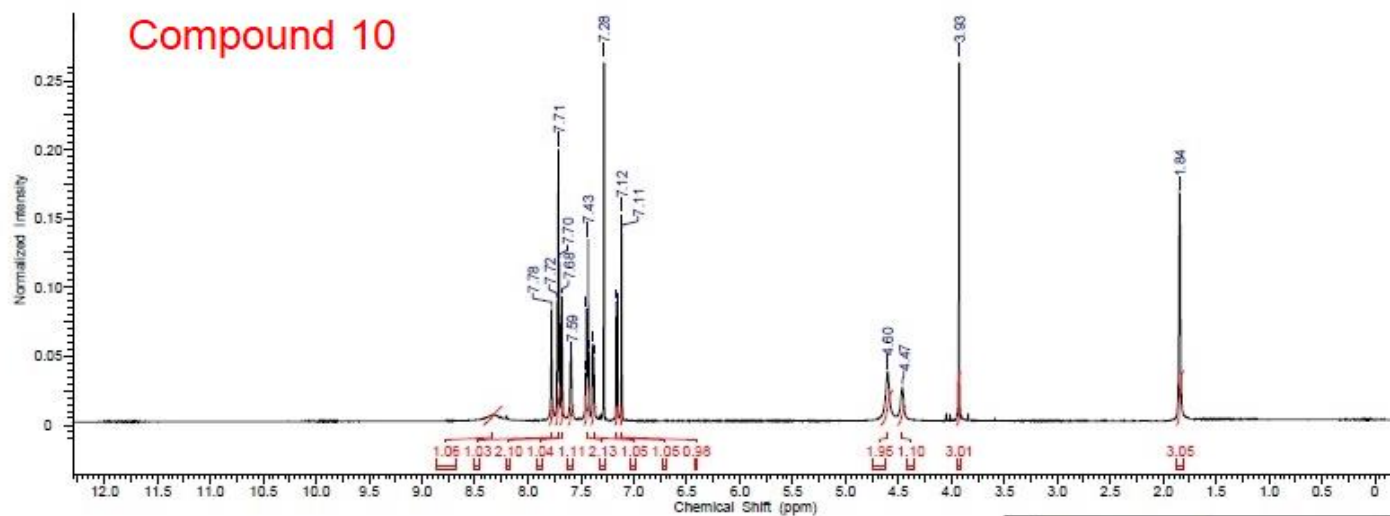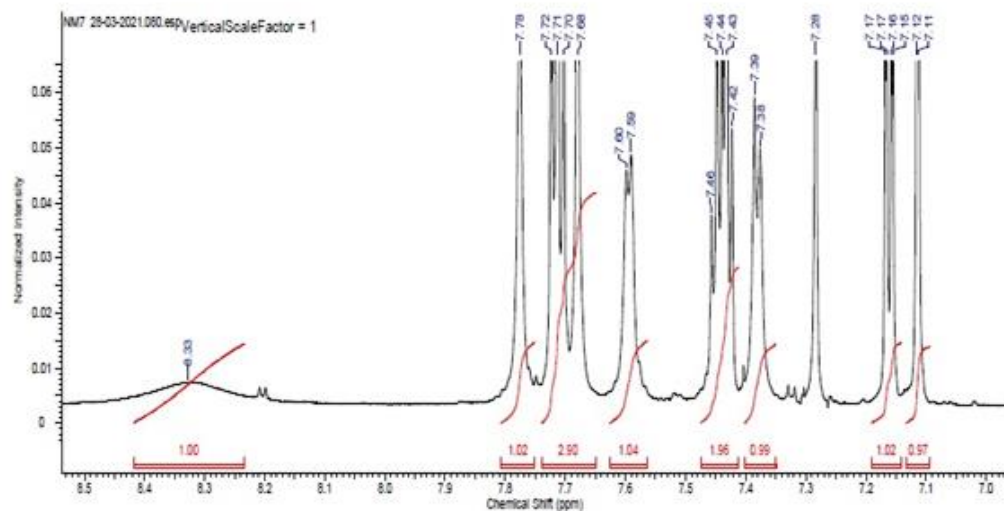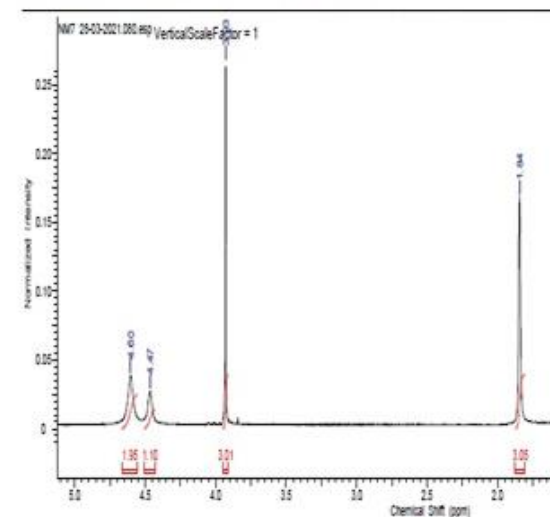

3/30/2021 1:57:36 AM

|                        |                      |                  |                                  |                        |                                                           |
|------------------------|----------------------|------------------|----------------------------------|------------------------|-----------------------------------------------------------|
| Acquisition Time (sec) | 1.9265               | Comments         | Dr. Abdusattar Sampe 25-03 CDCL3 | Date                   | 28 Mar 2021 20:29:36                                      |
| Date Stamp             | 28 Mar 2021 20:29:36 |                  |                                  | File Name              | C:\Users\hpi\Desktop\Na proxen NMR\NM9 28-03-2021\100.fid |
| Frequency (MHz)        | 850.15               | Nucleus          | <sup>1</sup> H                   | Number of Transients   | 32                                                        |
| Original Points Count  | 32768                | Owner            | nmr                              | Points Count           | 32768                                                     |
| Receiver Gain          | 10.55                | SW (cycles) (Hz) | 17006.60                         | Solvent                | CHLOROFORM-d                                              |
| Spectrum Offset (Hz)   | 5250.0293            | Spectrum Type    | STANDARD                         | Sweep Width (Hz)       | 17006.25                                                  |
|                        |                      |                  |                                  | Temperature (degree C) | 25.000                                                    |

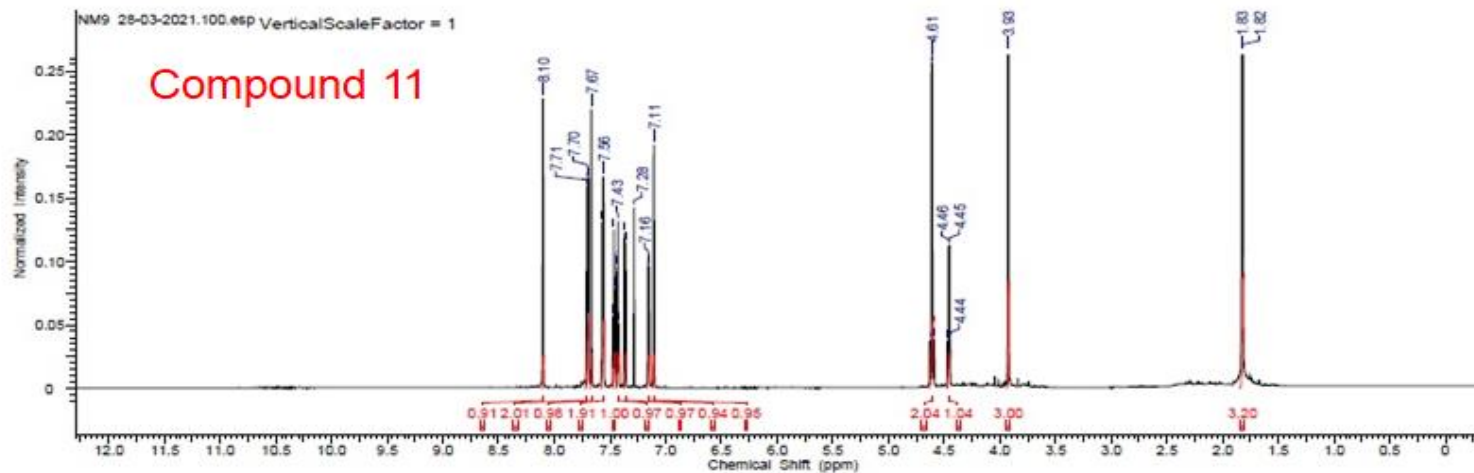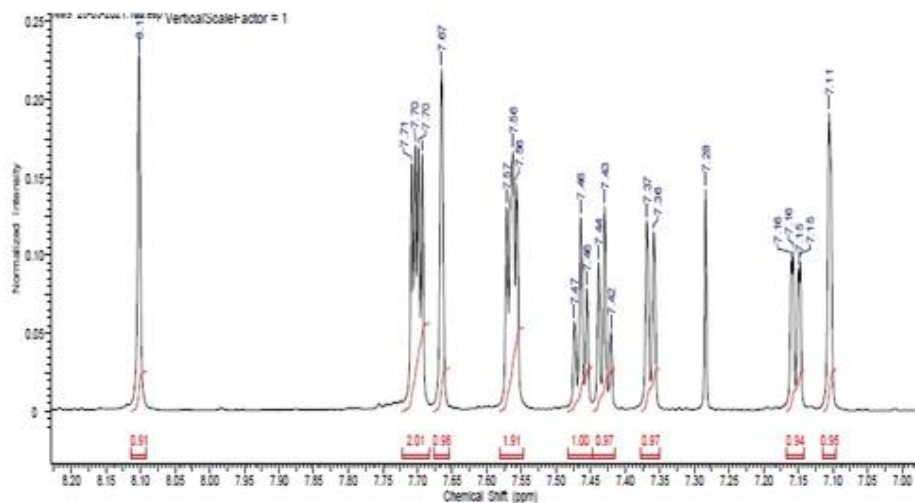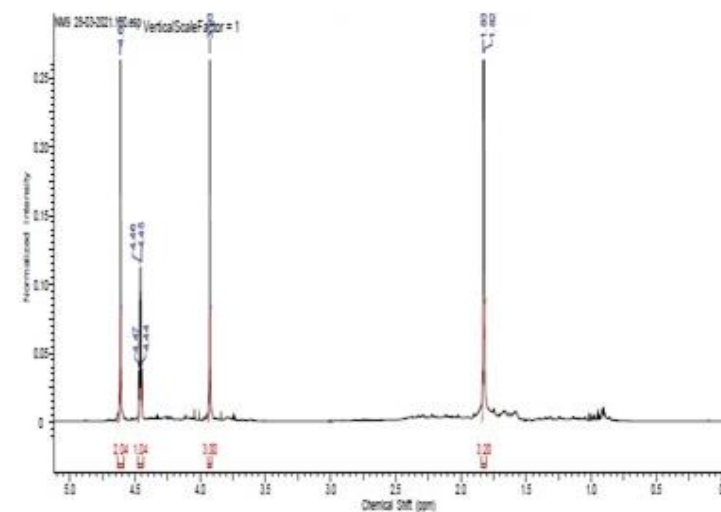

|                        |                      |                     |                                  |                                                       |                        |        |
|------------------------|----------------------|---------------------|----------------------------------|-------------------------------------------------------|------------------------|--------|
| Acquisition Time (sec) | 1.9258               | Comment             | Dr. Abdusattar Sampe 18-03 CDCL3 | Date                                                  | 28 Mar 2021 14:18:24   |        |
| Date Stamp             | 28 Mar 2021 14:18:24 |                     | File Name                        | C:\Users\hp\Desktop\Naproxen NMR\NM2_28-03-2021\30f9d |                        |        |
| Frequency (MHz)        | 550.15               | Nucleus             | <sup>1</sup> H                   | Number of Transients                                  | 32                     |        |
| Original Points Count  | 32768                | Owner               | nmr                              | Points Count                                          | 32768                  |        |
| Receiver Gain          | 11.37                | SW (cycles/pt) (Hz) | 17006.80                         | Pulse Sequence                                        | zg30                   |        |
| Spectrum Offset (Hz)   | 5250.0263            | Spectrum Type       | STANDARD                         | Solvent                                               | CHLOROFORM-d           |        |
|                        |                      |                     | Sweep Width (Hz)                 | 17006.28                                              | Temperature (degree C) | 25.001 |

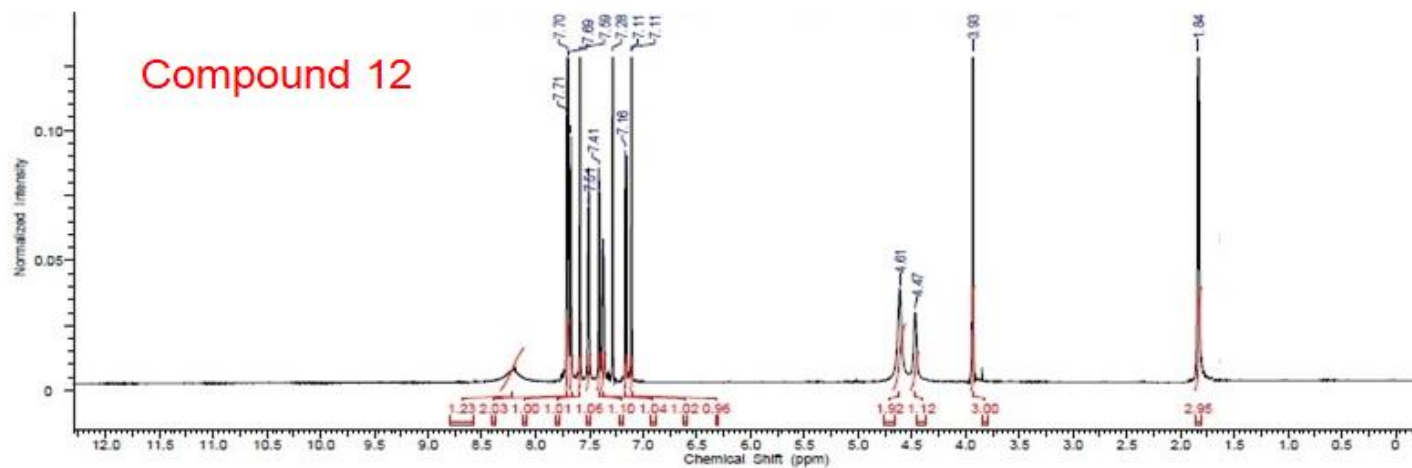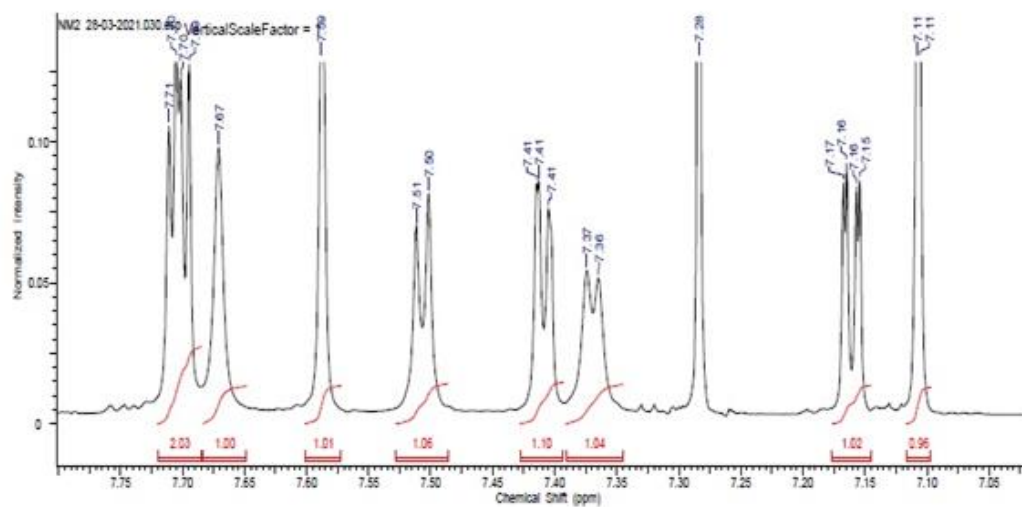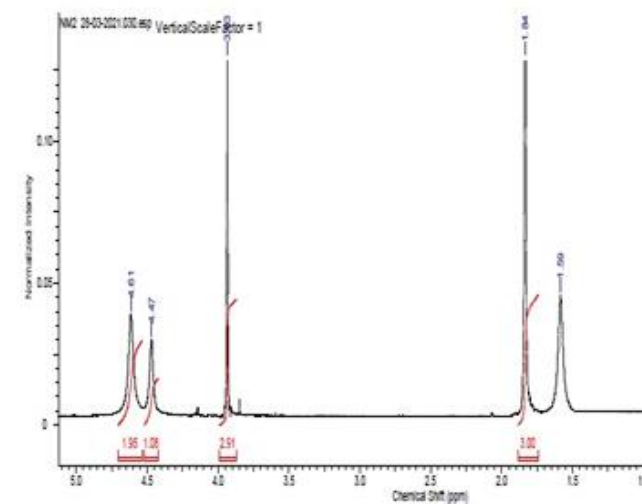



|                        |                      |                    |                                                         |                        |                      |
|------------------------|----------------------|--------------------|---------------------------------------------------------|------------------------|----------------------|
| Acquisition Time (sec) | 1.9258               | Comment            | Dr. Abdusattar Sample 24-03 CDCL3                       | Date                   | 28 Mar 2021 19:38:24 |
| Date Stamp             | 28 Mar 2021 19:38:24 | File Name          | C:\Users\hp\Desktop\Naproxen NMR\NMR 28-03-2021\906.fid | Origin                 | spect                |
| Frequency (MHz)        | 850.15               | Nucleus            | <sup>1</sup> H                                          | Number of Transients   | 32                   |
| Original Points Count  | 32768                | Owner              | nmr                                                     | Points Count           | 32768                |
| Receiver Gain          | 11.37                | SW (cyclical) (Hz) | 17006.80                                                | Solvent                | CHLOROFORM-d         |
| Spectrum Offset (Hz)   | 5250.0283            | Spectrum Type      | STANDARD                                                | Sweep Width (Hz)       | 17006.28             |
|                        |                      |                    |                                                         | Temperature (degree C) | 25.001               |

## Compound 13

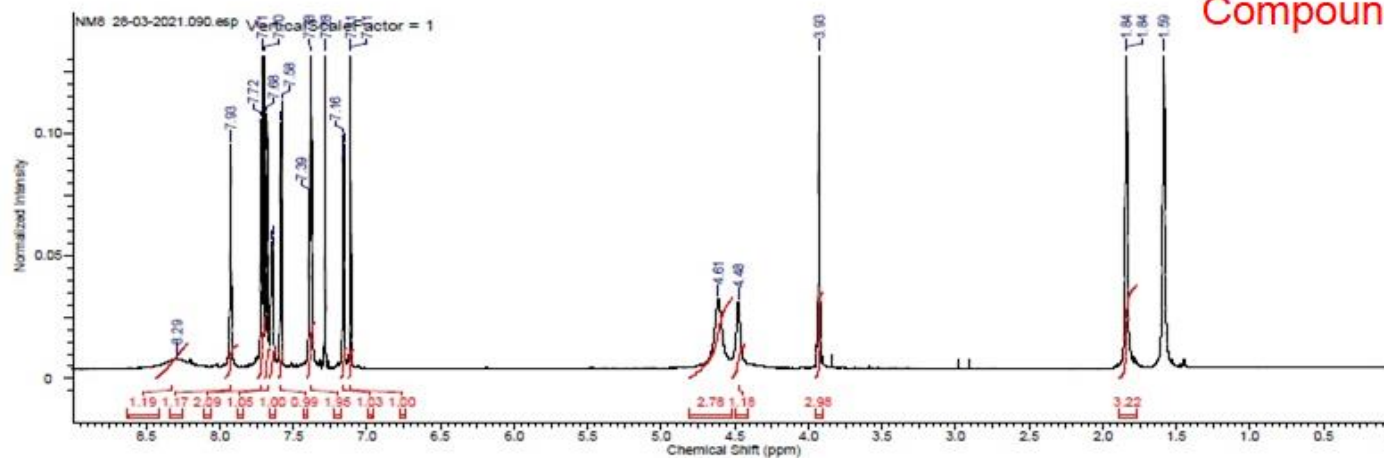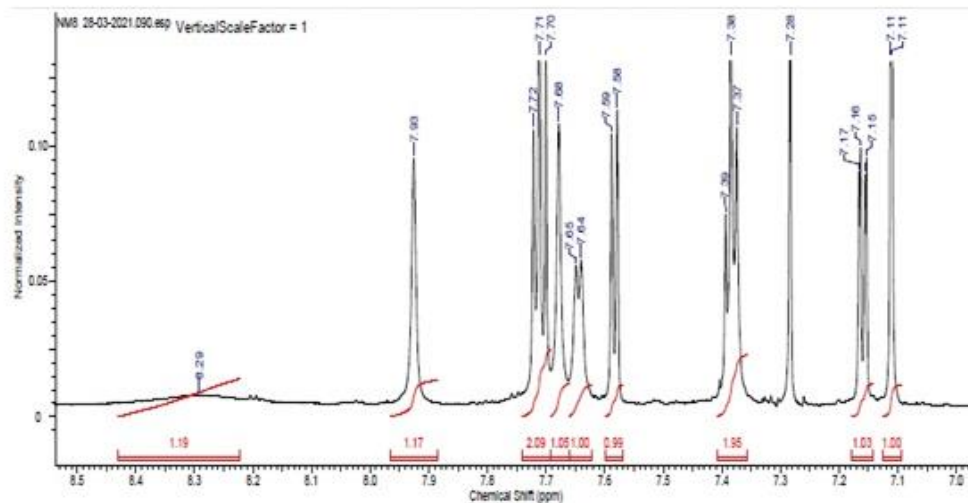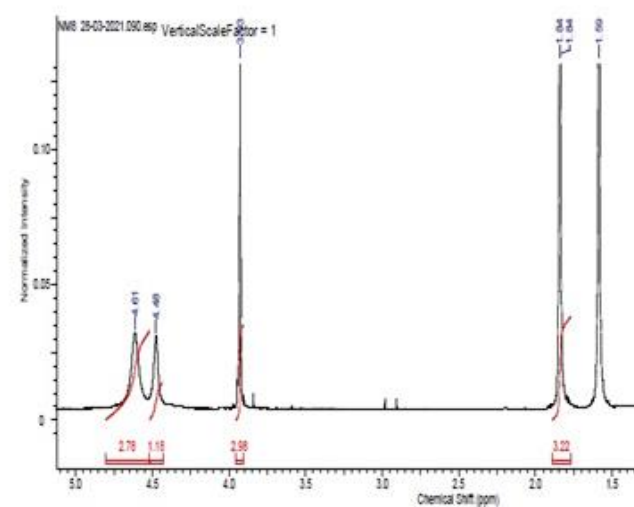

4/30/2021 1:43:48 AM

|                        |                      |                   |                                                        |                        |                      |
|------------------------|----------------------|-------------------|--------------------------------------------------------|------------------------|----------------------|
| Acquisition Time (sec) | 1.9268               | Comment           | Dr. Abdussattar Sampe 21-03 CDCL3                      | Date                   | 28 Mar 2021 16:56:16 |
| Date Stamp             | 28 Mar 2021 16:56:16 | File Name         | C:\Users\hpl\Desktop\Naproxen NMR\NMS 28-03-2021\60\6d | Origin                 | spect                |
| Frequency (MHz)        | 850.15               | Nucleus           | <sup>1</sup> H                                         | Number of Transients   | 32                   |
| Original Points Count  | 32768                | Owner             | nmr                                                    | Points Count           | 32768                |
| Receiver Gain          | 12.46                | SW(cyclical) (Hz) | 17006.80                                               | Pulse Sequence         | zg30                 |
| Spectrum Offset (Hz)   | 5171.6201            | Solvent           | CHLOROFORM-d                                           | Spectrum Type          | STANDARD             |
|                        |                      | Sweep Width (Hz)  | 17006.28                                               | Temperature (degree C) | 25.001               |

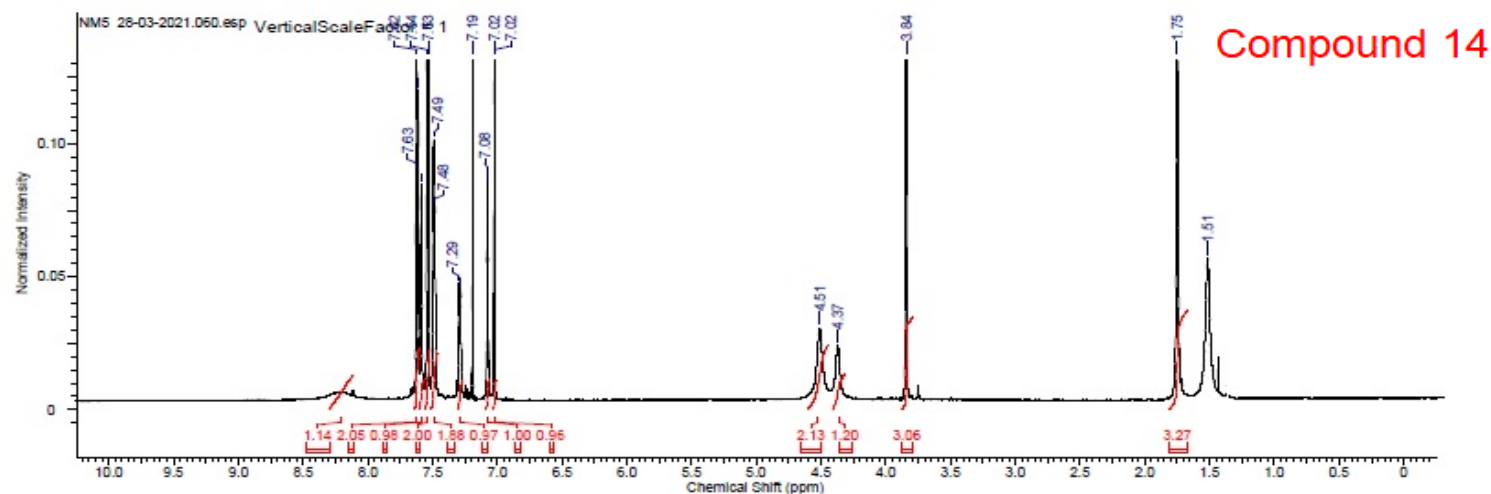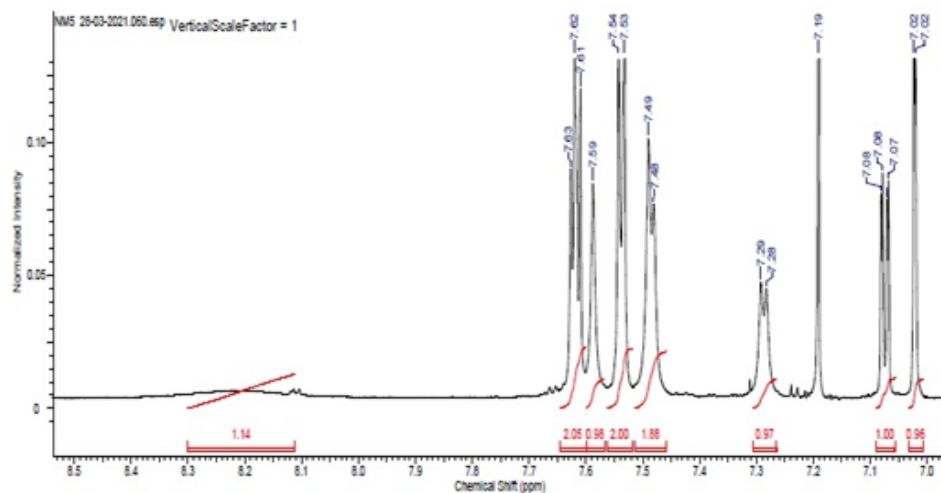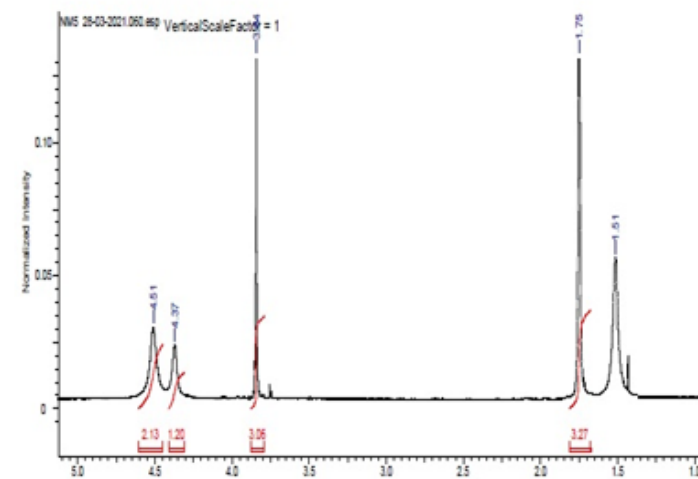



4/30/2021 1:45:14 PM

|                        |                      |                   |                                                         |                        |                      |
|------------------------|----------------------|-------------------|---------------------------------------------------------|------------------------|----------------------|
| Acquisition Time (sec) | 1.9268               | Comment           | Dr. Abdusattar Sange 22-03 CDCL3                        | Date                   | 28 Mar 2021 17:51:44 |
| Date Stamp             | 28 Mar 2021 17:51:44 | File Name         | C:\Users\hp\Desktop\Naproxen NMR\NM6 28-03-2021\706.fid | Origin                 | spect                |
| Frequency (MHz)        | 850.15               | Nucleus           | <sup>1</sup> H                                          | Number of Transients   | 32                   |
| Original Points Count  | 32768                | Owner             | nmr                                                     | Points Count           | 32768                |
| Receiver Gain          | 11.37                | SW(cyclical) (Hz) | 17006.80                                                | Pulse Sequence         | zg30                 |
| Spectrum Offset (Hz)   | 5250.0283            | Spectrum Type     | STANDARD                                                | Solvent                | CHLOROFORM-d         |
|                        |                      | Sweep Width (Hz)  | 17006.28                                                | Temperature (degree C) | 25.000               |

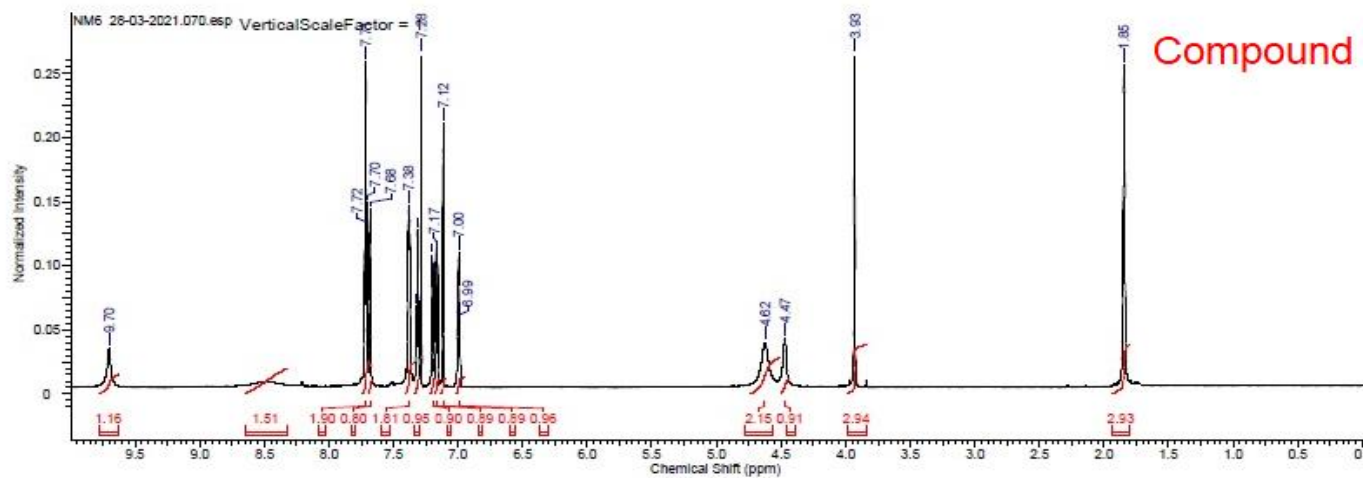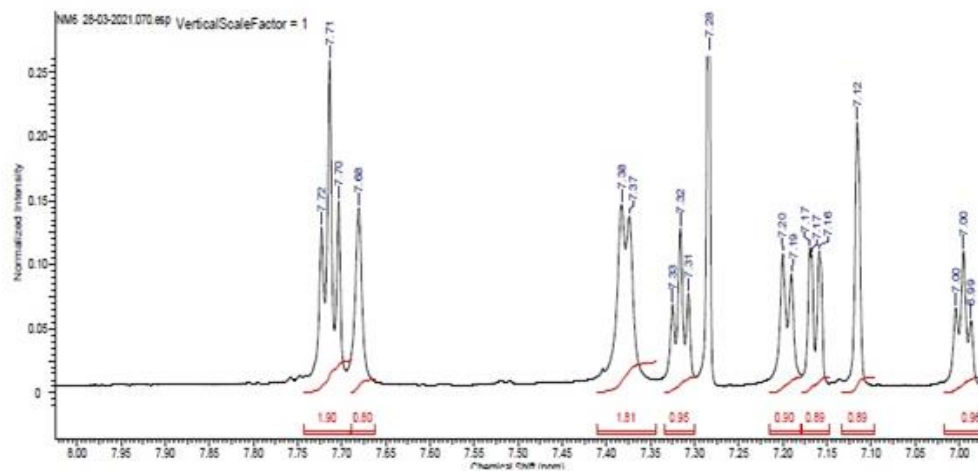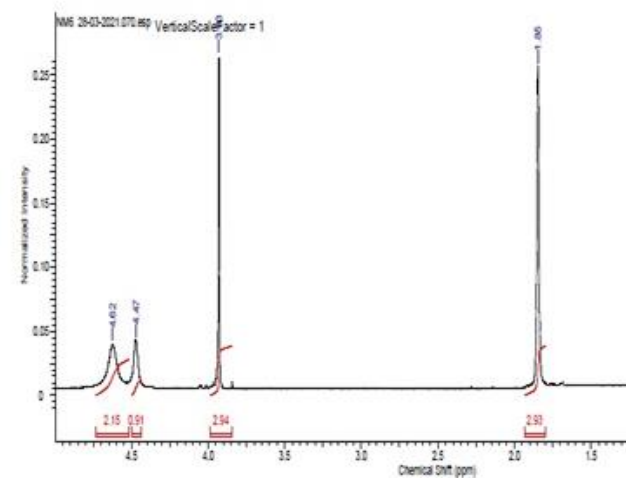

# Compound 16

3/29/2021 10:14:05 PM

|                        |                      |               |                                  |                        |                                                         |
|------------------------|----------------------|---------------|----------------------------------|------------------------|---------------------------------------------------------|
| Acquisition Time (sec) | 1.9268               | Comment       | Dr. Abdusattar Sampe 19-03 CDCL3 | Date                   | 28 Mar 2021 15:11:44                                    |
| Date Stamp             | 28 Mar 2021 15:11:44 |               |                                  | File Name              | C:\Users\hpi\Desktop\Naproxen NMR\NM3 28-03-2021\40.fid |
| Frequency (MHz)        | 850.15               | Nucleus       | <sup>1</sup> H                   | Number of Transients   | 32                                                      |
| Original Points Count  | 32768                | Owner         | nmr                              | Points Count           | 32768                                                   |
| Receiver Gain          | 12.46                | SW (cycles)   | 17006.80                         | Pulse Sequence         | zg30                                                    |
| Spectrum Offset (Hz)   | 5250.0283            | Spectrum Type | STANDARD                         | Solvent                | CHLOROFORM-d                                            |
|                        |                      |               |                                  | Temperature (degree C) | 25.000                                                  |

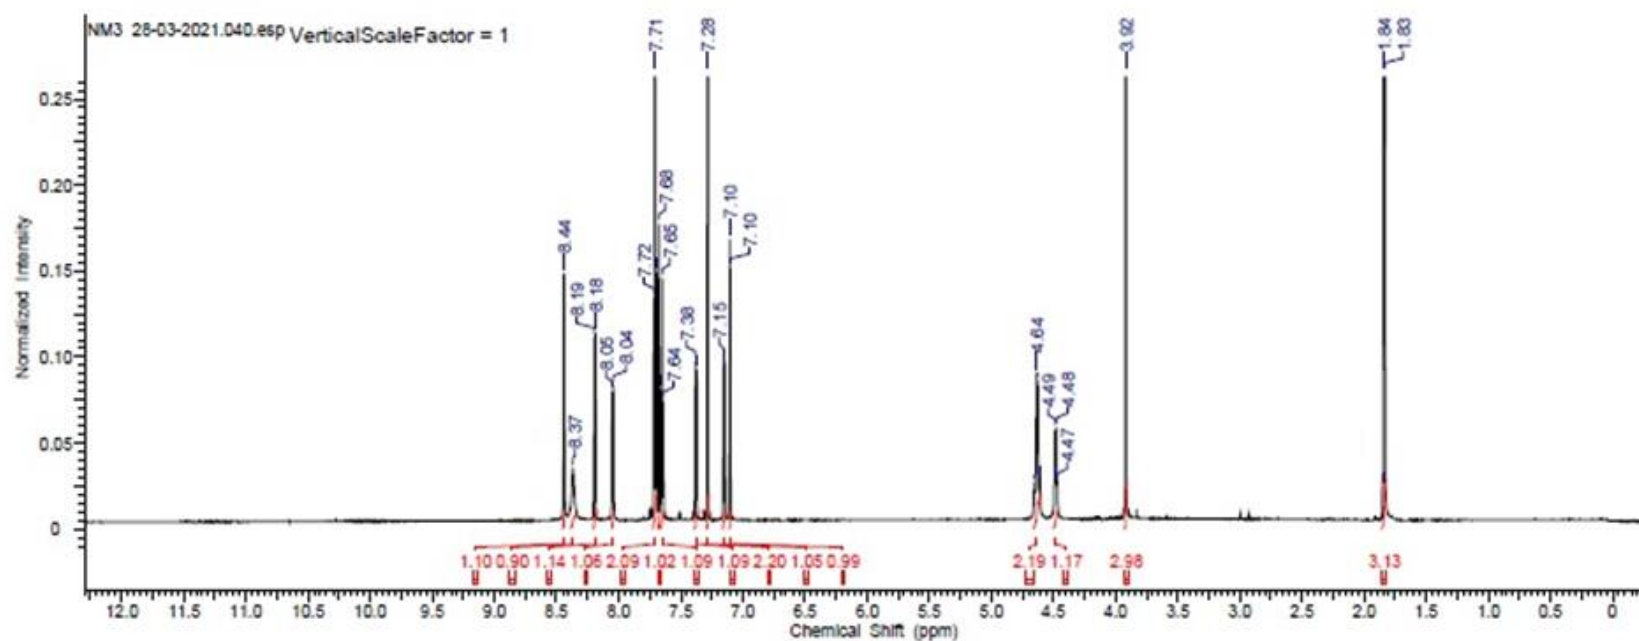

4/30/2021 2:40:13 PM

|                        |                      |                   |                                   |                                                          |                      |
|------------------------|----------------------|-------------------|-----------------------------------|----------------------------------------------------------|----------------------|
| Acquisition Time (sec) | 1.9268               | Comment           | Dr. Abdusattar Sample 26-03_CDCL3 | Date                                                     | 28 Mar 2021 21:22:56 |
| Date Stamp             | 28 Mar 2021 21:22:56 |                   | File Name                         | C:\Users\hp\Desktop\Naproxen NMR\NM10_28-03-2021\110.fid |                      |
| Frequency (MHz)        | 850.15               | Nucleus           | <sup>1</sup> H                    | Number of Transients                                     | 32                   |
| Original Points Count  | 32768                | Owner             | nmr                               | Points Count                                             | 32768                |
| Receiver Gain          | 11.37                | SW(cyclical) (Hz) | 17006.80                          | Solvent                                                  | CHLOROFORM-d         |
| Spectrum Offset (Hz)   | 5250.0283            | Spectrum Type     | STANDARD                          | Sweep Width (Hz)                                         | 17006.28             |
|                        |                      |                   |                                   | Temperature (degree C)                                   | 25.000               |

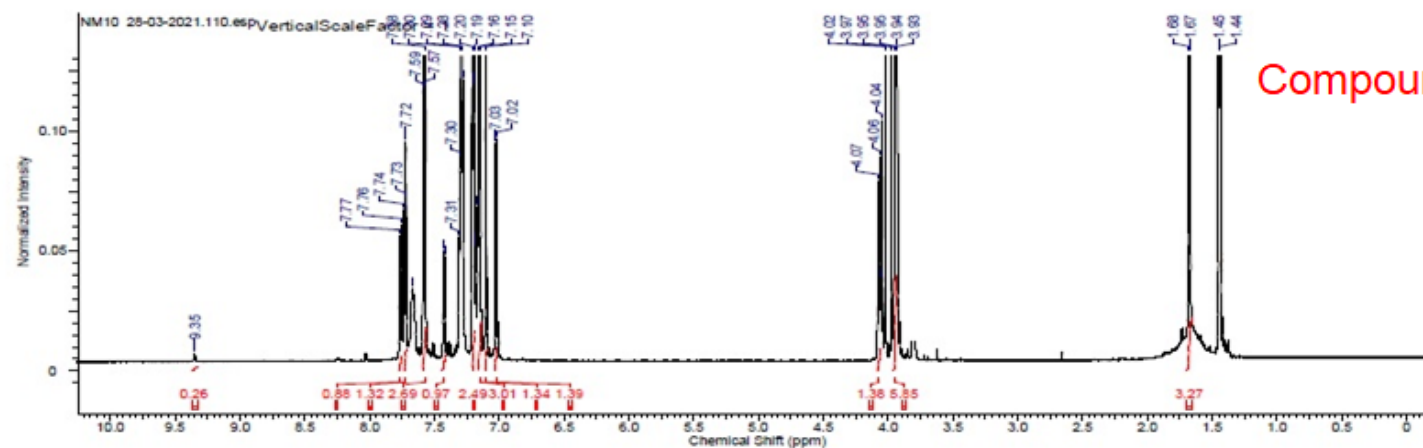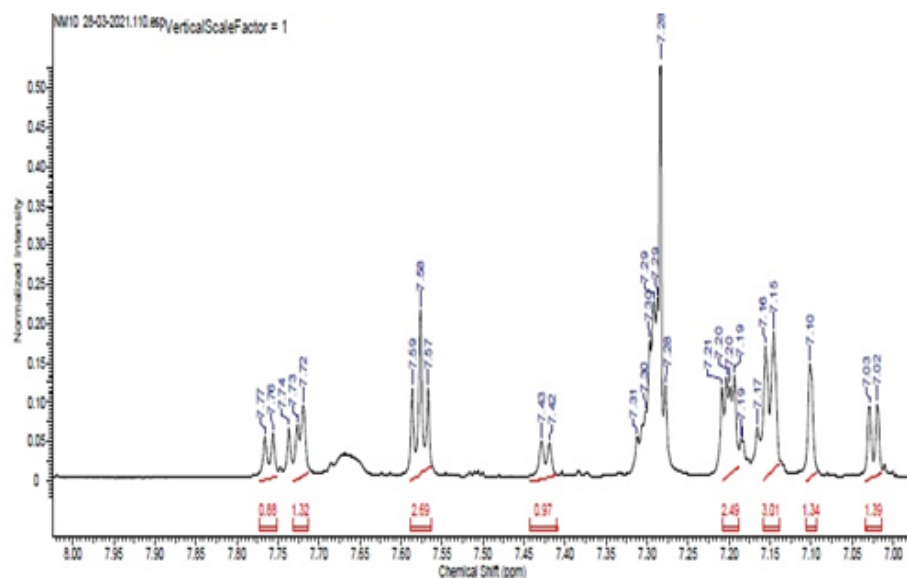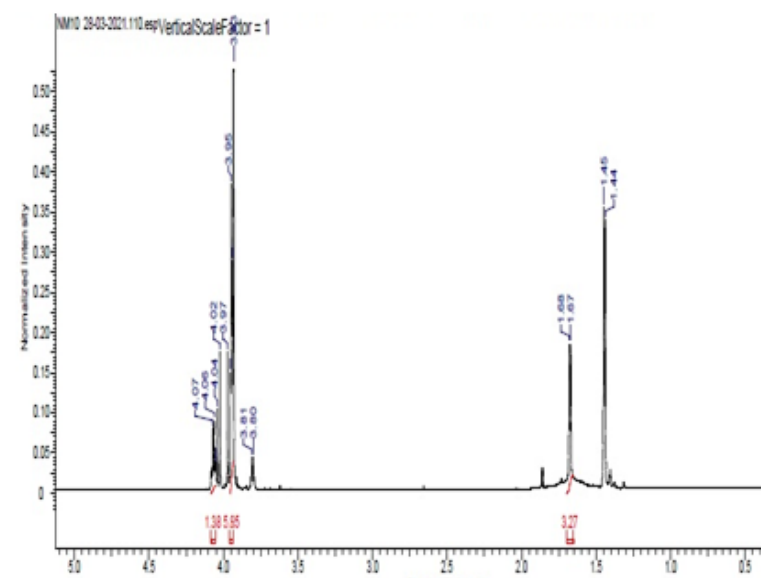

|                        |                      |                   |                                   |                                        |              |                        |                      |
|------------------------|----------------------|-------------------|-----------------------------------|----------------------------------------|--------------|------------------------|----------------------|
| Acquisition Time (sec) | 1.9268               | Comment           | Dr. Abdusattar Sample 27-03 CDCL3 |                                        |              | Date                   | 28 Mar 2021 22:16:16 |
| Date Stamp             | 28 Mar 2021 22:16:16 |                   | File Name                         | C:\Users\shp\Desktop\Naproxen NMR\NM11 |              |                        | 28-03-2021\120fid    |
| Frequency (MHz)        | 850.15               | Nucleus           | <sup>1</sup> H                    | Number of Transients                   | 32           | Origin                 | spect                |
| Original Points Count  | 32768                | Owner             | nmr                               | Points Count                           | 32768        | Pulse Sequence         | zg30                 |
| Receiver Gain          | 11.37                | SW(cyclical) (Hz) | 17006.80                          | Solvent                                | CHLOROFORM-d |                        |                      |
| Spectrum Offset (Hz)   | 5250.0283            | Spectrum Type     | STANDARD                          | Sweep Width (Hz)                       | 17006.28     | Temperature (degree C) | 24.998               |

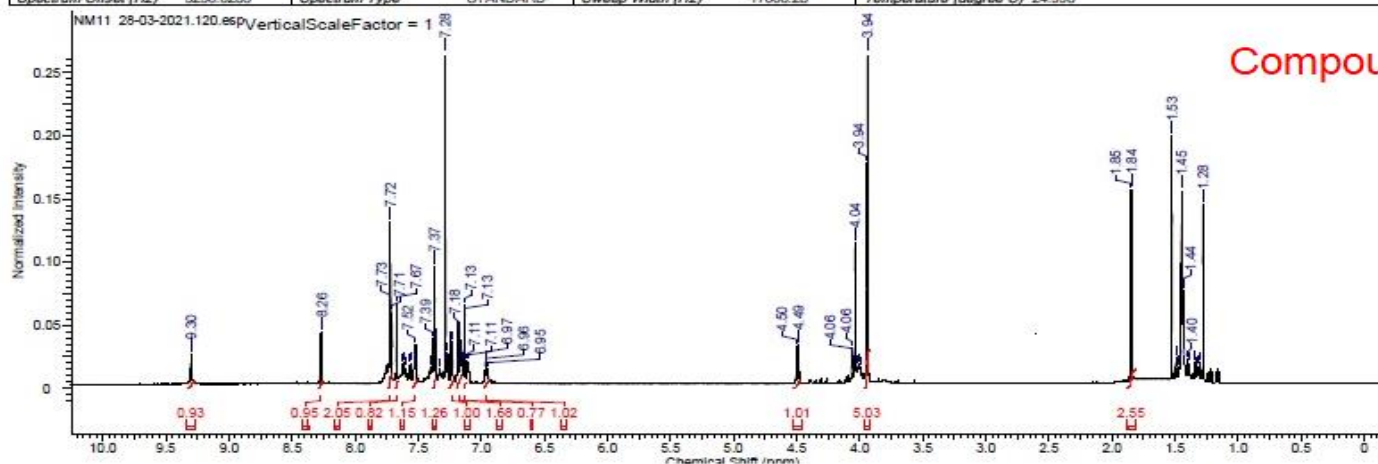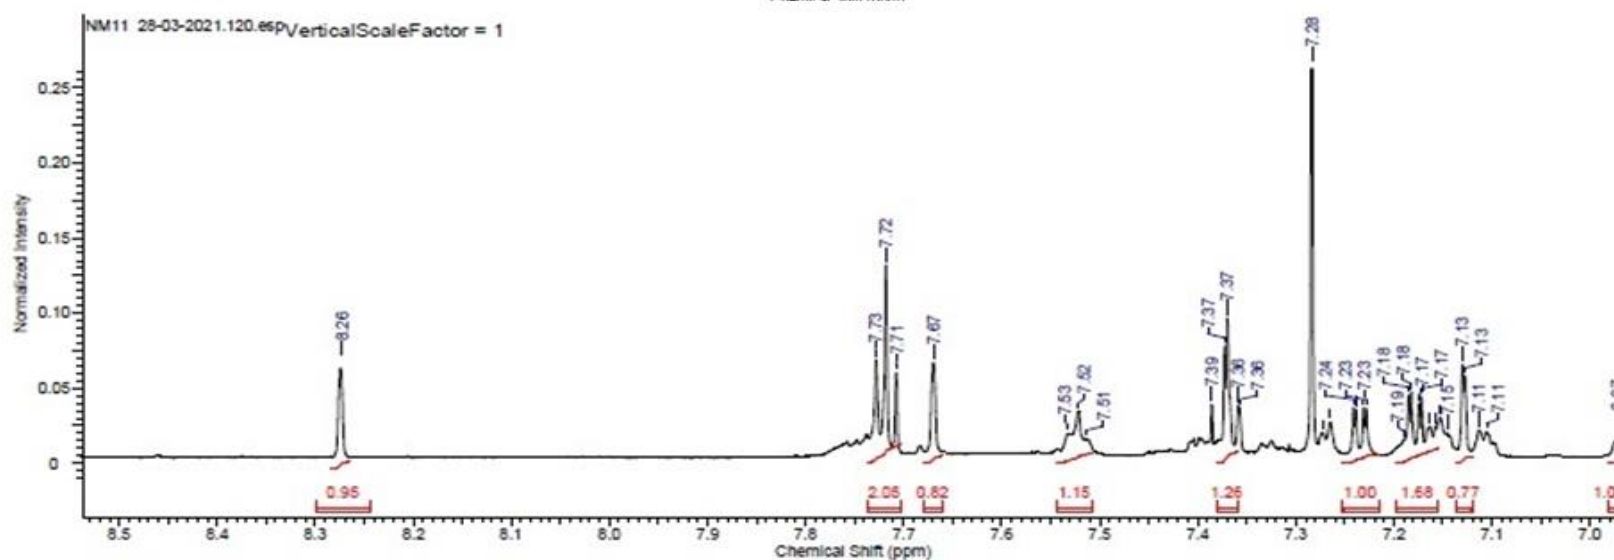

4/30/2021 2:23:49 PM

|                        |                      |                   |                       |                      |              |                        |                                                           |
|------------------------|----------------------|-------------------|-----------------------|----------------------|--------------|------------------------|-----------------------------------------------------------|
| Acquisition Time (sec) | 1.9268               | Comment           | Dr. Abdussattar Sampe | 28-03                | CDCL3        | Date                   | 28 Mar 2021 23:09:36                                      |
| Date Stamp             | 28 Mar 2021 23:09:36 |                   |                       |                      |              | File Name              | C:\Users\shp\Desktop\Naproxen NMR\NM12 28-03-2021\130\fid |
| Frequency (MHz)        | 850.15               | Nucleus           | 1H                    | Number of Transients | 32           | Origin                 | spect                                                     |
| Original Points Count  | 32768                | Owner             | nmr                   | Points Count         | 32768        | Pulse Sequence         | zg30                                                      |
| Receiver Gain          | 12.46                | SW(cyclical) (Hz) | 17006.80              | Solvent              | CHLOROFORM-d |                        |                                                           |
| Spectrum Offset (Hz)   | 5250.0283            | Spectrum Type     | STANDARD              | Sweep Width (Hz)     | 17006.28     | Temperature (degree C) | 25.000                                                    |

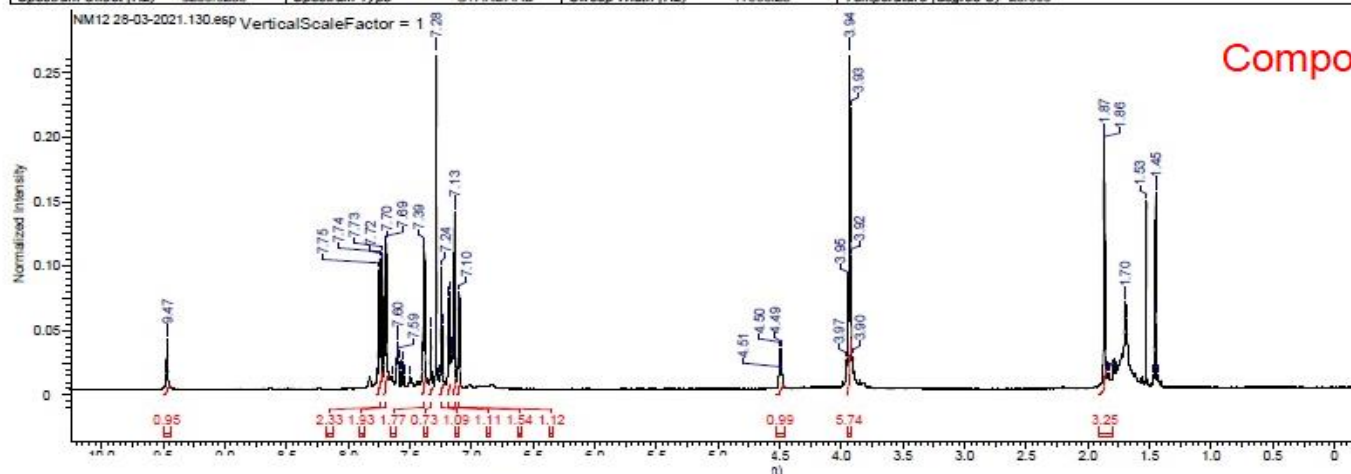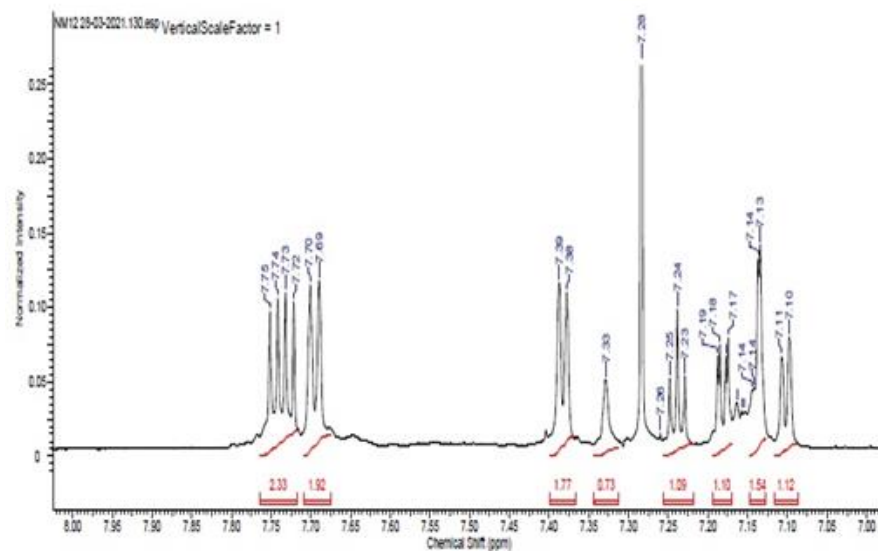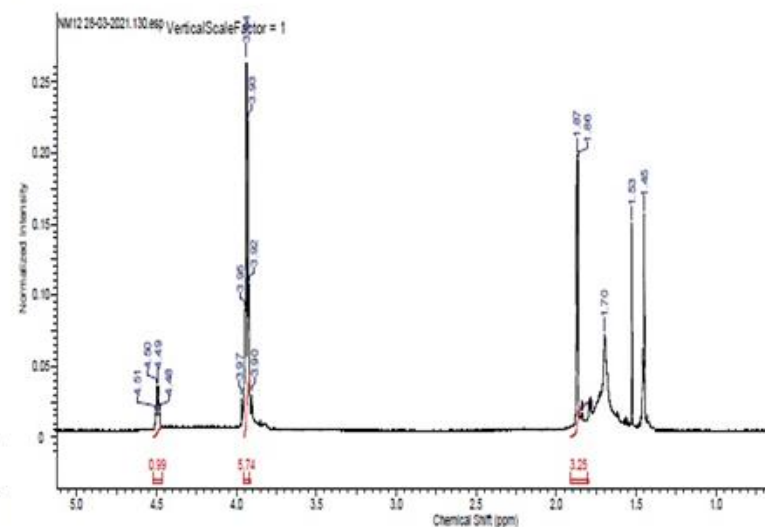



|                        |                      |                   |                                   |                                                           |              |                        |                      |
|------------------------|----------------------|-------------------|-----------------------------------|-----------------------------------------------------------|--------------|------------------------|----------------------|
| Acquisition Time (sec) | 1.9268               | Comment           | Dr. Abdusattar Sample 29-03 CDCL3 |                                                           |              | Date                   | 29 Mar 2021 00:00:48 |
| Date Stamp             | 29 Mar 2021 00:00:48 |                   | File Name                         | C:\Users\vip\Desktop\Naproxen NMR\NM13_28-03-2021\140.fid |              |                        |                      |
| Frequency (MHz)        | 850.15               | Nucleus           | <sup>1</sup> H                    | Number of Transients                                      | 32           | Origin                 | spect                |
| Original Points Count  | 32768                | Owner             | nmr                               | Points Count                                              | 32768        | Pulse Sequence         | zg30                 |
| Receiver Gain          | 12.46                | SW(cyclical) (Hz) | 17006.80                          | Solvent                                                   | CHLOROFORM-d |                        |                      |
| Spectrum Offset (Hz)   | 5250.0283            | Spectrum Type     | STANDARD                          | Sweep Width (Hz)                                          | 17006.28     | Temperature (degree C) | 25.000               |

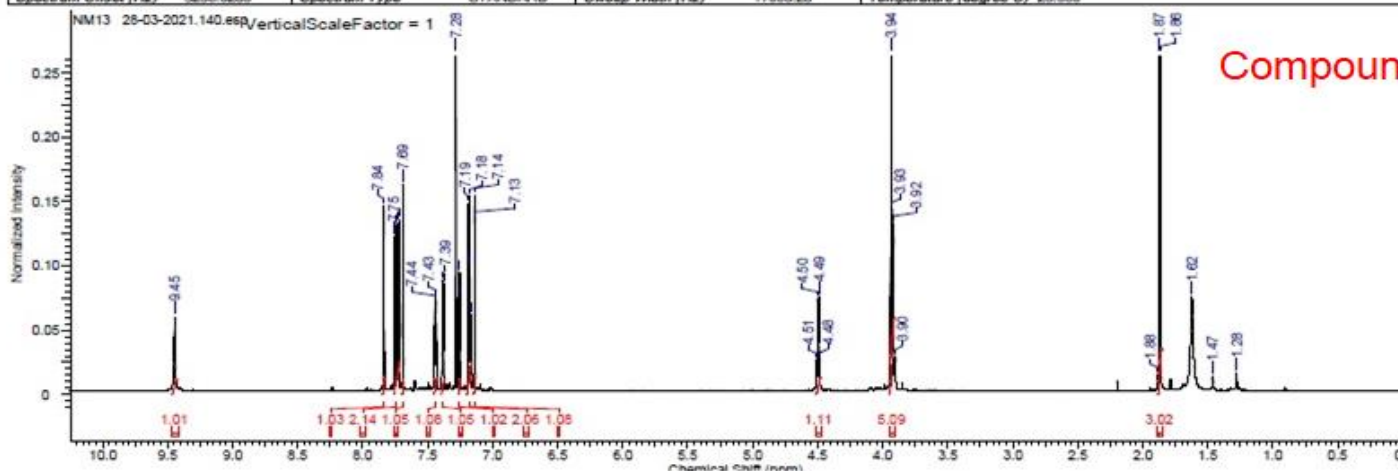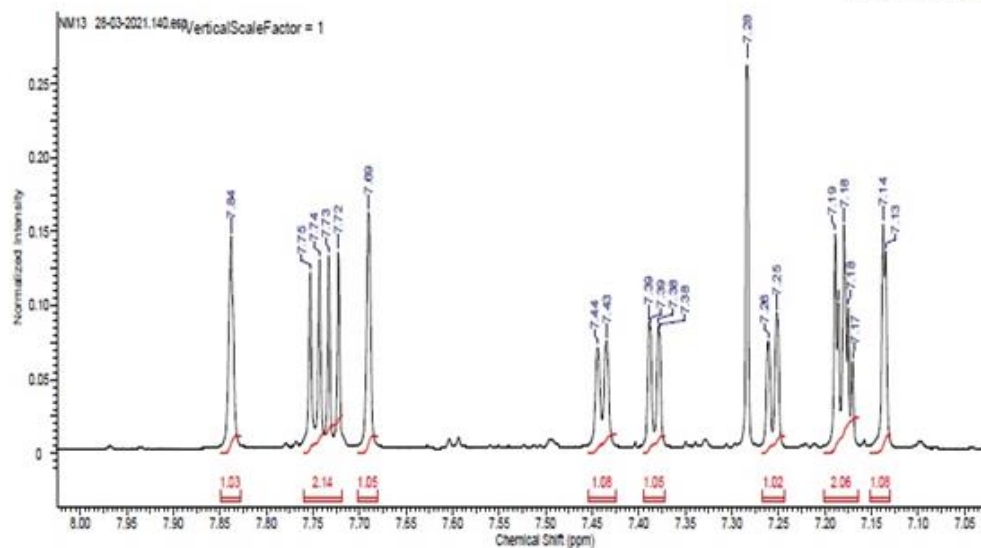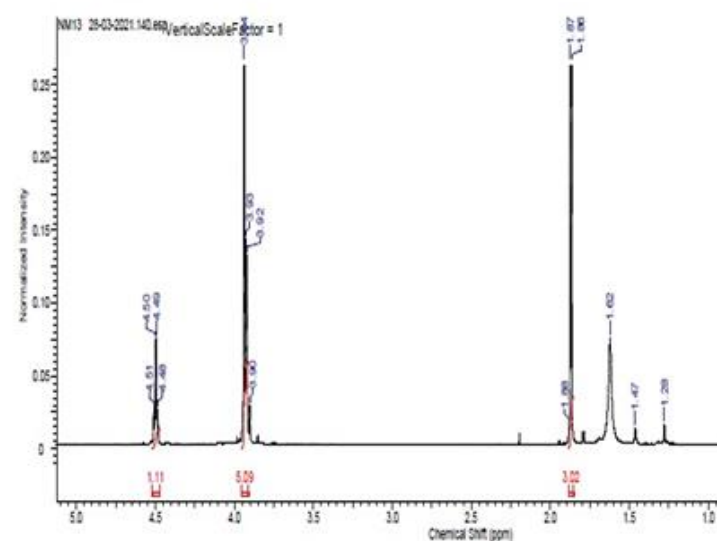

4/30/2021 4:08:32 PM

|                        |                      |                   |                                                             |                        |                      |
|------------------------|----------------------|-------------------|-------------------------------------------------------------|------------------------|----------------------|
| Acquisition Time (sec) | 1.9268               | Comment           | Dr. Abdusattar Sample 33-03 CDCL3                           | Date                   | 29 Mar 2021 03:34:08 |
| Date Stamp             | 29 Mar 2021 03:34:08 | File Name         | C:\Users\hdp\Desktop\Naproxen NMR\ NM17_ 29-03-2021\180.fid | Origin                 | spect                |
| Frequency (MHz)        | 850.15               | Nucleus           | 1H                                                          | Number of Transients   | 32                   |
| Original Points Count  | 32768                | Owner             | nmr                                                         | Points Count           | 32768                |
| Receiver Gain          | 12.46                | SW(cyclical) (Hz) | 17006.80                                                    | Solvent                | CHLOROFORM-d         |
| Spectrum Offset (Hz)   | 5250.0283            | Spectrum Type     | STANDARD                                                    | Sweep Width (Hz)       | 17006.28             |
|                        |                      |                   |                                                             | Temperature (degree C) | 24.997               |

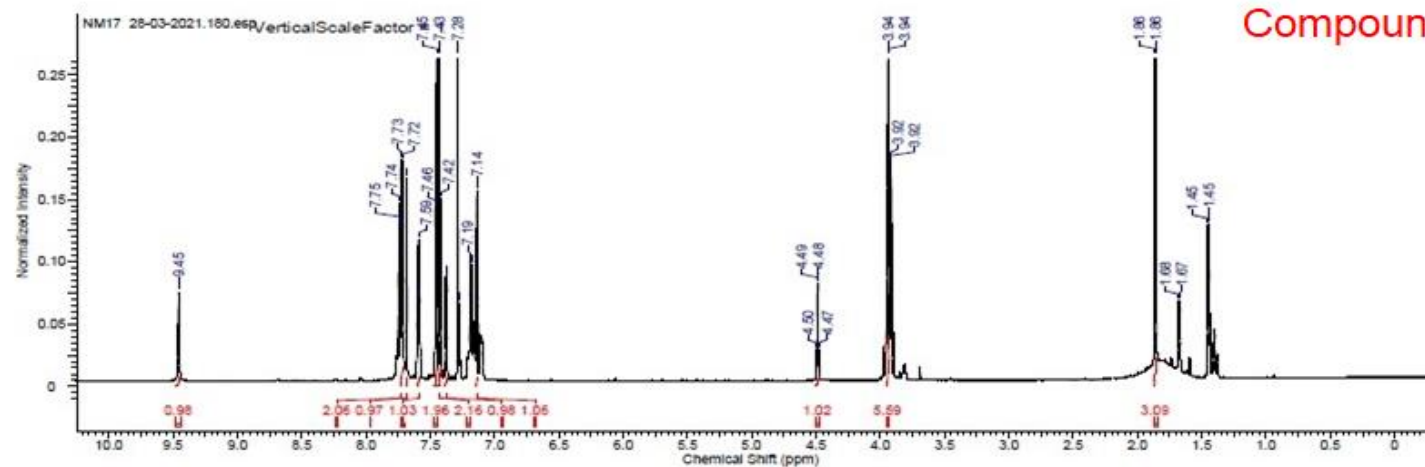

Compound 23

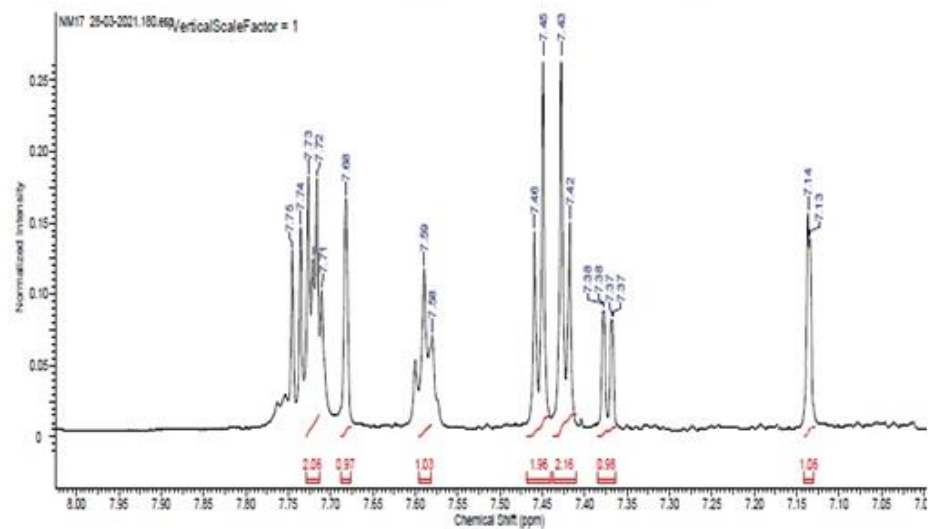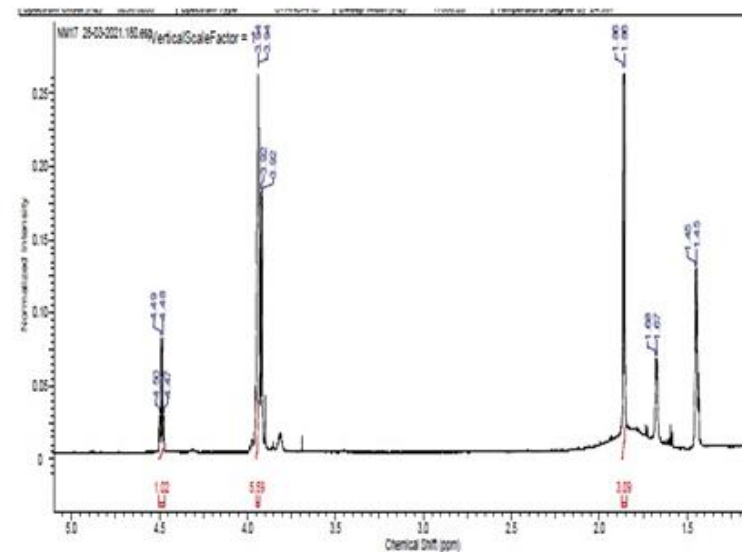

|                        |                      |                   |                                                          |                        |                      |
|------------------------|----------------------|-------------------|----------------------------------------------------------|------------------------|----------------------|
| Acquisition Time (sec) | 1.9268               | Comment           | Dr. Abdussattar Sample 32-03 CDCL3                       | Date                   | 29 Mar 2021 02:40:48 |
| Date Stamp             | 29 Mar 2021 02:40:48 | File Name         | C:\Users\hp\Desktop\Naproxen NMR\ NM16 28-03-2021\1706fd | Origin                 | spect                |
| Frequency (MHz)        | 850.15               | Nucleus           | 1H                                                       | Number of Transients   | 32                   |
| Original Points Count  | 32768                | Owner             | nmr                                                      | Points Count           | 32768                |
| Receiver Gain          | 12.46                | SW(cyclical) (Hz) | 17006.80                                                 | Pulse Sequence         | zg30                 |
| Spectrum Offset (Hz)   | 6250.0283            | Spectrum Type     | STANDARD                                                 | Solvent                | CHLOROFORM-d         |
|                        |                      | Sweep Width (Hz)  | 17006.28                                                 | Temperature (degree C) | 24.999               |

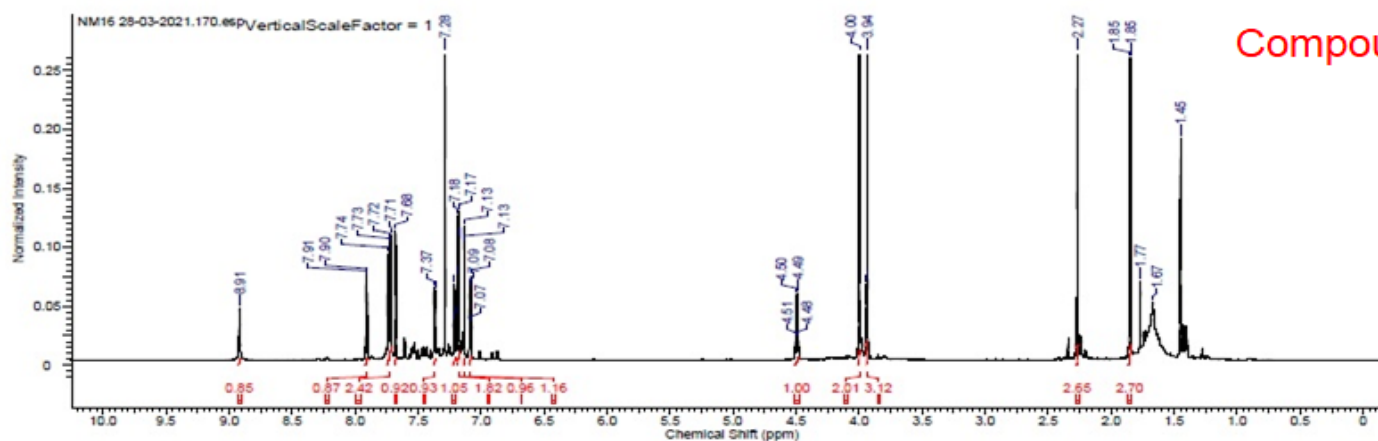

Compound 24

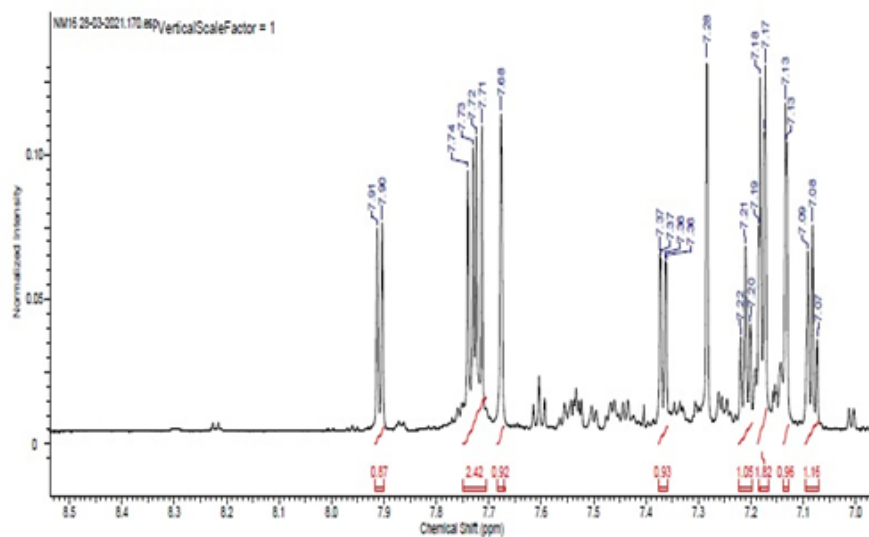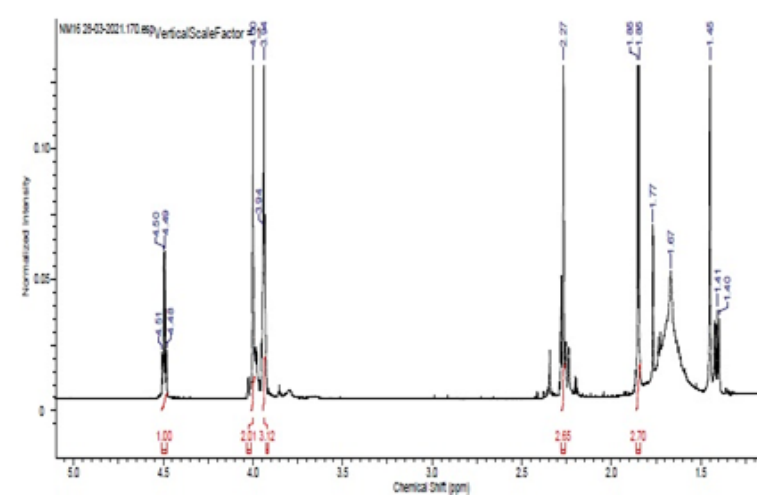



4/30/2021 3:32:40 PM

|                        |                      |                   |                                   |                                                           |                      |
|------------------------|----------------------|-------------------|-----------------------------------|-----------------------------------------------------------|----------------------|
| Acquisition Time (sec) | 1.9268               | Comment           | Dr. Abdusattar Sample 31-03 CDCL3 | Date                                                      | 29 Mar 2021 01:47:28 |
| Date Samp              | 29 Mar 2021 01:47:28 |                   | File Name                         | C:\Users\hpl\Desktop\Naproxen NMR\NM15_28-03-2021\160.fid |                      |
| Frequency (MHz)        | 850.15               | Nucleus           | 1H                                | Number of Transients                                      | 32                   |
| Original Points Count  | 32758                | Owner             | nmr                               | Points Count                                              | 32768                |
| Receiver Gain          | 12.46                | SW(cyclical) (Hz) | 17006.80                          | Solvent                                                   | CHLOROFORM-d         |
| Spectrum Offset (Hz)   | 5250.0283            | Spectrum Type     | STANDARD                          | Sweep Width (Hz)                                          | 17006.26             |
|                        |                      |                   |                                   | Temperature (degree C)                                    | 24.958               |

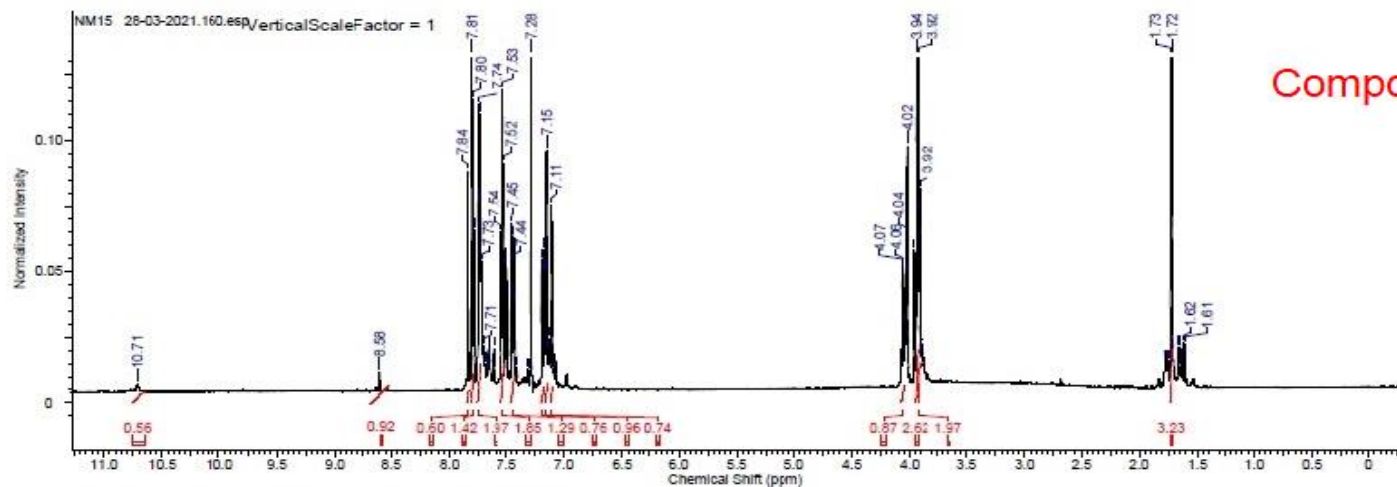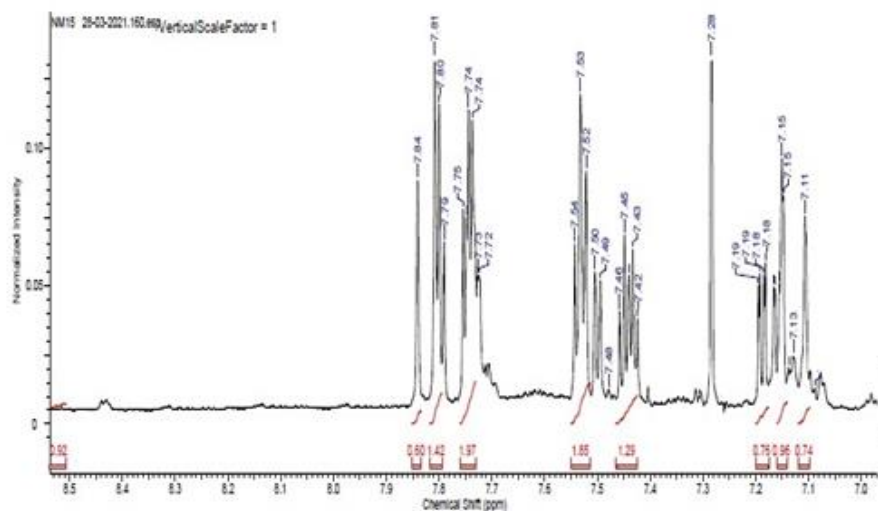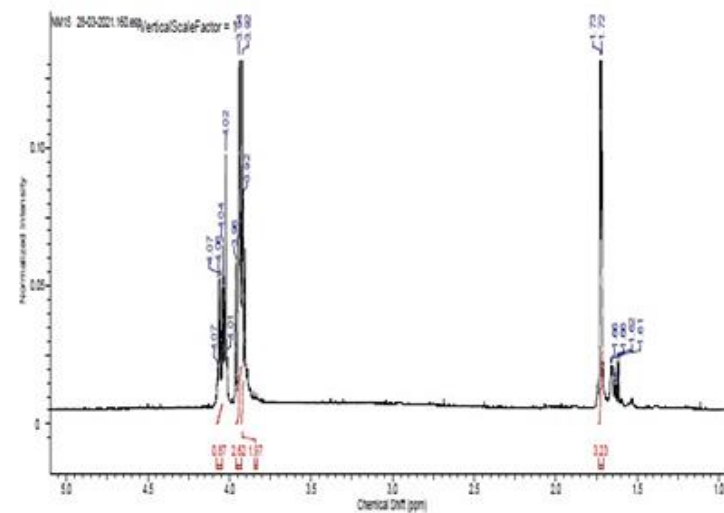

|                        |                      |                   |                                                         |                        |                      |
|------------------------|----------------------|-------------------|---------------------------------------------------------|------------------------|----------------------|
| Acquisition Time (sec) | 1.9258               | Comment           | Dr. Abdusattar Sample 30-03_CDCL3                       | Date                   | 29 Mar 2021 00:56:16 |
| Date Stamp             | 29 Mar 2021 00:56:16 | File Name         | C:\Users\hp\Desktop\Naproxen NMR\NM14_28-03-2021\150v6d | Origin                 | spect                |
| Frequency (MHz)        | 850.15               | Nucleus           | <sup>1</sup> H                                          | Number of Transients   | 32                   |
| Original Points Count  | 32768                | Owner             | nmr                                                     | Points Count           | 32768                |
| Receiver Gain          | 11.37                | SW(cyclical) (Hz) | 17006.80                                                | Pulse Sequence         | zg30                 |
| Spectrum Offset (Hz)   | 5250.0283            | Spectrum Type     | STANDARD                                                | Solvent                | CHLOROFORM-d         |
|                        |                      | Sweep Width (Hz)  | 17006.28                                                | Temperature (degree C) | 25.000               |

## Compound 26

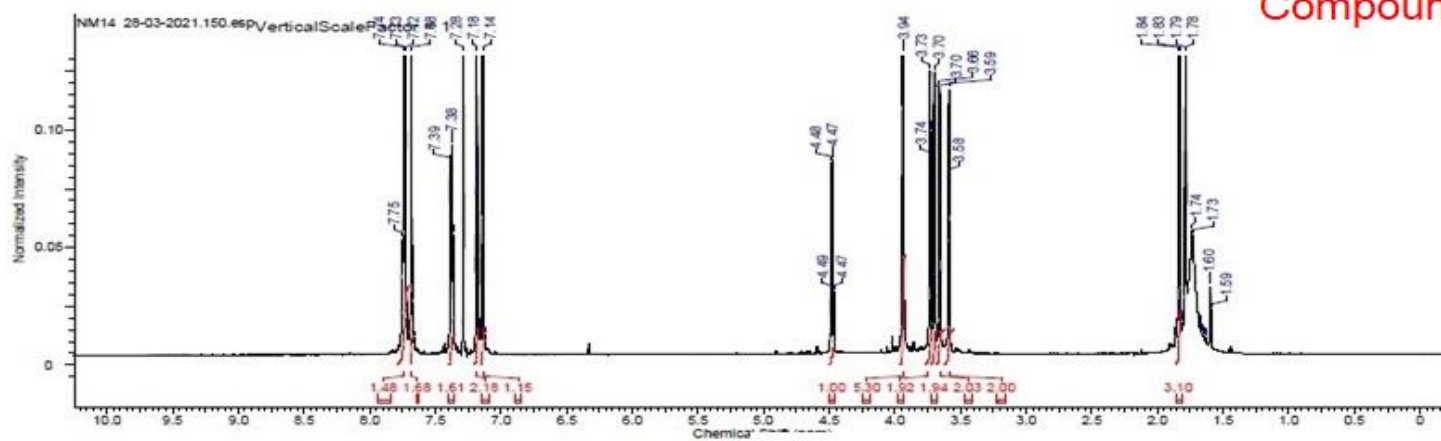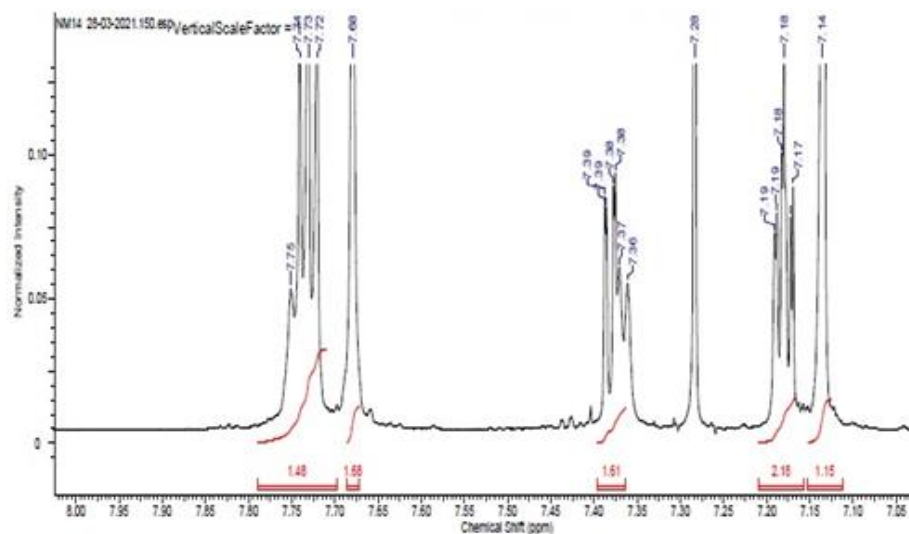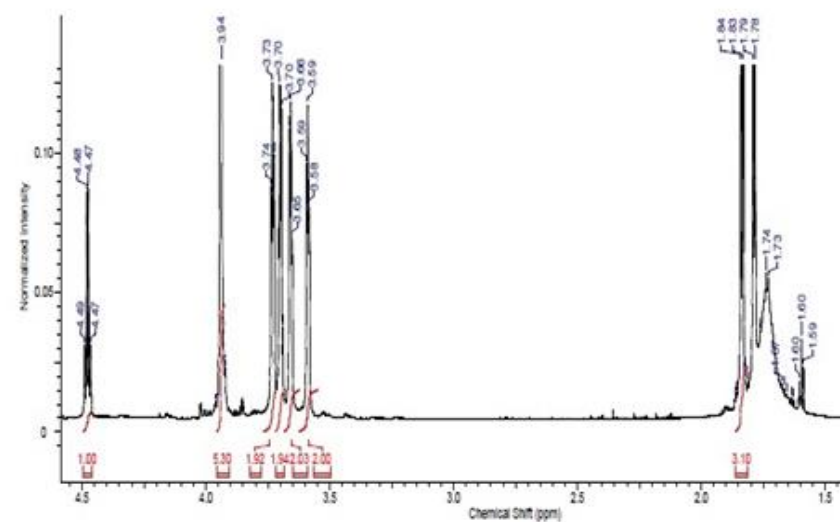

Figure S18-S34:  $^{13}\text{C}$  NMR of compounds

## Compound 8

4/28/2021 11:14:55 PM

|                        |                      |                   |                                  |                        |                                                       |
|------------------------|----------------------|-------------------|----------------------------------|------------------------|-------------------------------------------------------|
| Acquisition Time (sec) | 0.6423               | Comment           | Dr. Abdusattar Sampe 17-03 CDCL3 | Date                   | 28 Mar 2021 14:12:00                                  |
| Date Stamp             | 28 Mar 2021 14:12:00 |                   |                                  | File Name              | C:\Users\hp\Desktop\Naproxen NMR\NM1 28-03-2021\21f5d |
| Frequency (MHz)        | 213.77               | Nucleus           | $^{13}\text{C}$                  | Number of Transients   | 1024                                                  |
| Original Points Count  | 32768                | Owner             | nmr                              | Points Count           | 32768                                                 |
| Receiver Gain          | 186.93               | SW(cyclical) (Hz) | 51020.41                         | Solvent                | CHLOROFORM-d                                          |
| Spectrum Offset (Hz)   | 21376.0332           | Spectrum Type     | STANDARD                         | Sweep Width (Hz)       | 51018.85                                              |
|                        |                      |                   |                                  | Temperature (degree C) | 25.000                                                |

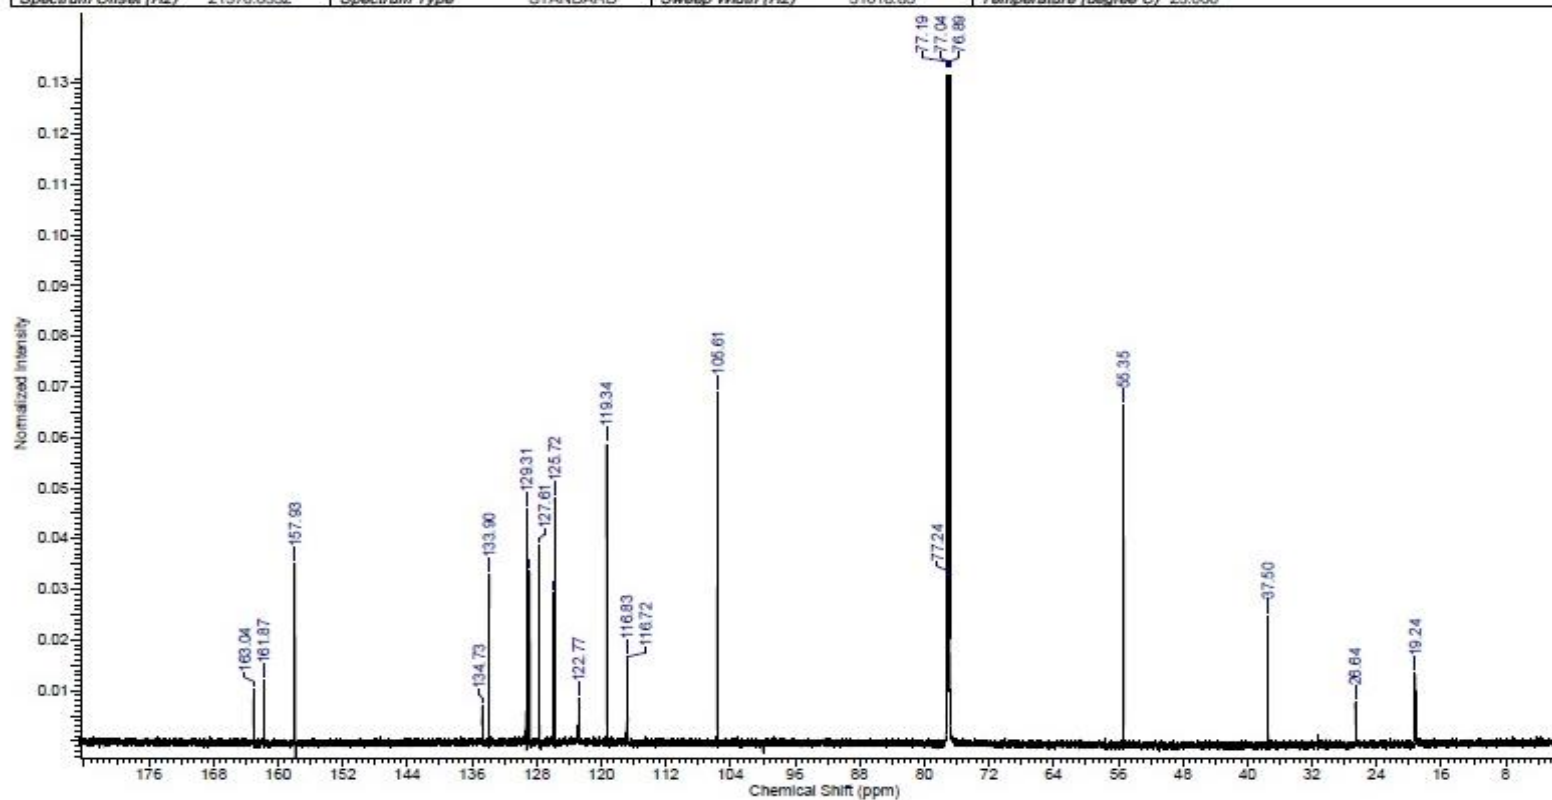

# Compound 9

4/28/2021 10:44:41 PM

|                        |                      |                   |                                  |                                       |                      |
|------------------------|----------------------|-------------------|----------------------------------|---------------------------------------|----------------------|
| Acquisition Time (sec) | 0.6423               | Comment           | Dr. Abdusattir Sampe 20-03 CDCL3 | Date                                  | 28 Mar 2021 16:52:00 |
| Date Stamp             | 28 Mar 2021 16:52:00 |                   | File Name                        | C:\Users\hpl\Desktop\Naproxen NMR\NM4 | 28-03-2021\51\6d     |
| Frequency (MHz)        | 213.77               | Nucleus           | <sup>13</sup> C                  | Number of Transients                  | 1024                 |
| Original Points Count  | 32768                | Owner             | nmr                              | Points Count                          | 32768                |
| Receiver Gain          | 186.93               | SW(cyclical) (Hz) | 51020.41                         | Solvent                               | CHLOROFORM-d         |
| Spectrum Offset (Hz)   | 21376.0332           | Spectrum Type     | STANDARD                         | Sweep Width (Hz)                      | 51018.85             |
|                        |                      |                   |                                  | Temperature (degree C)                | 24.999               |

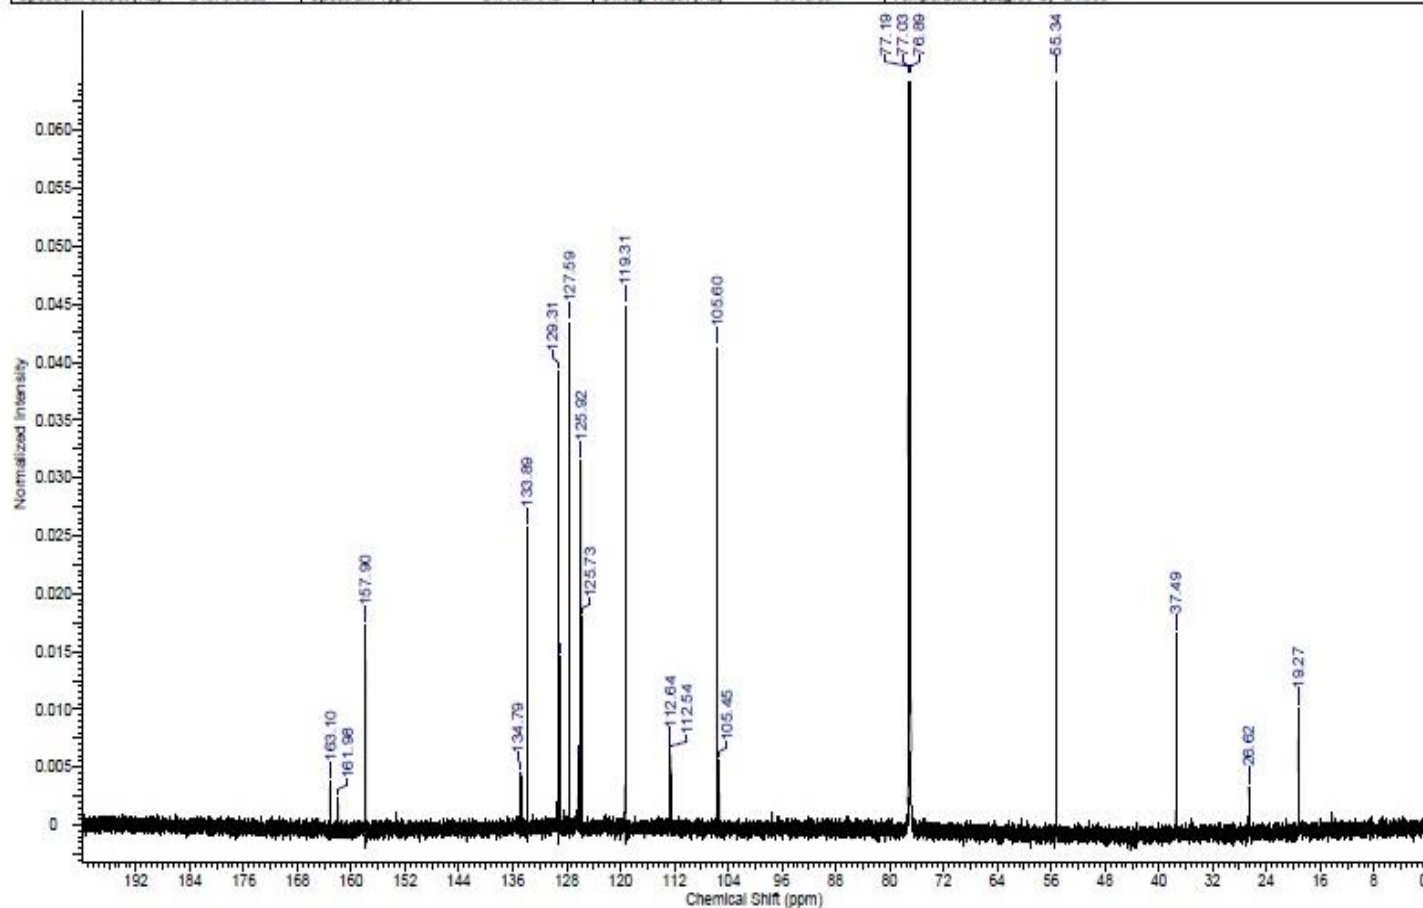

# Compound 10

4/28/2021 10:39:20 PM

|                        |                      |                   |                                  |                        |                                                         |
|------------------------|----------------------|-------------------|----------------------------------|------------------------|---------------------------------------------------------|
| Acquisition Time (sec) | 0.6423               | Comment           | Dr. Abdusattar Sampe 23-03 CDCL3 | Date                   | 28 Mar 2021 19:32:00                                    |
| Date Stamp             | 28 Mar 2021 19:32:00 |                   |                                  | File Name              | C:\Users\shp\Desktop\Naproxen NMR\NM7 28-03-2021\81.fid |
| Frequency (MHz)        | 213.77               | Nucleus           | <sup>13</sup> C                  | Number of Transients   | 1024                                                    |
| Original Points Count  | 32768                | Owner             | nmr                              | Points Count           | 32768                                                   |
| Receiver Gain          | 186.93               | SW(cyclical) (Hz) | 51020.41                         | Solvent                | CHLOROFORM-d                                            |
| Spectrum Offset (Hz)   | 21376.0332           | Spectrum Type     | STANDARD                         | Sweep Width (Hz)       | 51018.85                                                |
|                        |                      |                   |                                  | Temperature (degree C) | 25.001                                                  |

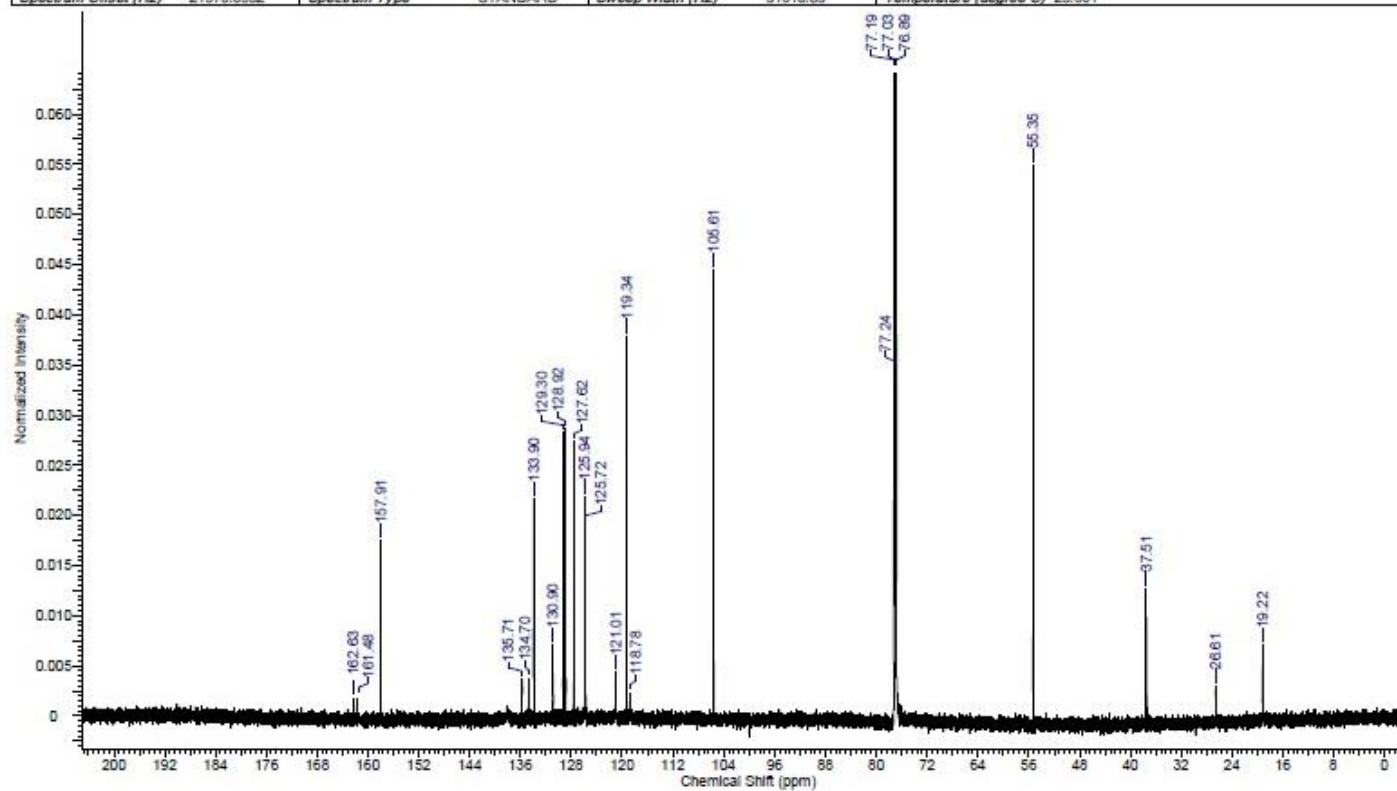

# Compound 11

3/30/2021 2:05:53 AM

|                        |                      |               |                                                           |                        |                      |
|------------------------|----------------------|---------------|-----------------------------------------------------------|------------------------|----------------------|
| Acquisition Time (sec) | 0.6423               | Comment       | Dr. Abdussattar Sampe 25-03 CDCL3                         | Date                   | 28 Mar 2021 21:18:40 |
| Date Stamp             | 28 Mar 2021 21:18:40 | File Name     | C:\Users\hpl\Desktop\Naproxen NMR\NM9_28-03-2021\1102.fid |                        |                      |
| Frequency (MHz)        | 213.77               | Nucleus       | <sup>13</sup> C                                           | Number of Transients   | 1024                 |
| Original Points Count  | 32768                | Owner         | nmr                                                       | Points Count           | 32768                |
| Receiver Gain          | 186.93               | SW (cycles)   | 51020.41                                                  | Pulse Sequence         | zgpg30               |
| Spectrum Offset (Hz)   | 21376.0332           | Solvent       | CHLOROFORM-d                                              |                        |                      |
|                        |                      | Spectrum Type | STANDARD                                                  | Sweep Width (Hz)       | 51018.85             |
|                        |                      |               |                                                           | Temperature (degree C) | 24.999               |

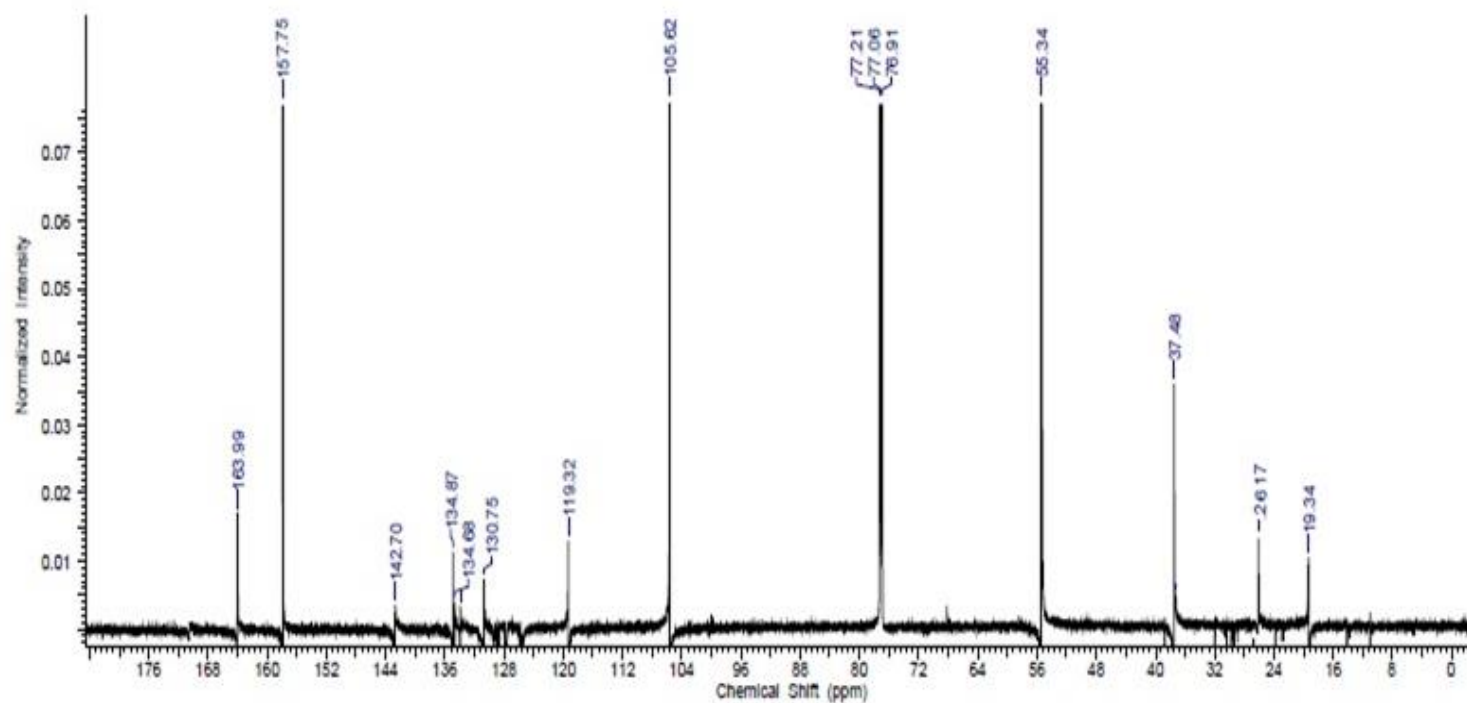



# Compound 12

4/28/2021 10:49:36 PM

|                        |                      |                   |                                                       |                        |                      |
|------------------------|----------------------|-------------------|-------------------------------------------------------|------------------------|----------------------|
| Acquisition Time (sec) | 0.6423               | Comment           | Dr. Abdusattar Sampe 18-03 CDCL3                      | Date                   | 28 Mar 2021 15:07:28 |
| Date Stamp             | 28 Mar 2021 15:07:28 | File Name         | C:\Users\hp\Desktop\Naproxen NMR\NM2 28-03-2021\31fid |                        |                      |
| Frequency (MHz)        | 213.77               | Nucleus           | <sup>13</sup> C                                       | Number of Transients   | 1024                 |
| Original Points Count  | 32768                | Owner             | nmr                                                   | Points Count           | 32768                |
| Receiver Gain          | 186.93               | SW(cyclical) (Hz) | 51020.41                                              | Solvent                | CHLOROFORM-d         |
| Spectrum Offset (Hz)   | 21376.0332           | Spectrum Type     | STANDARD                                              | Sweep Width (Hz)       | 51018.85             |
|                        |                      |                   |                                                       | Temperature (degree C) | 25.000               |

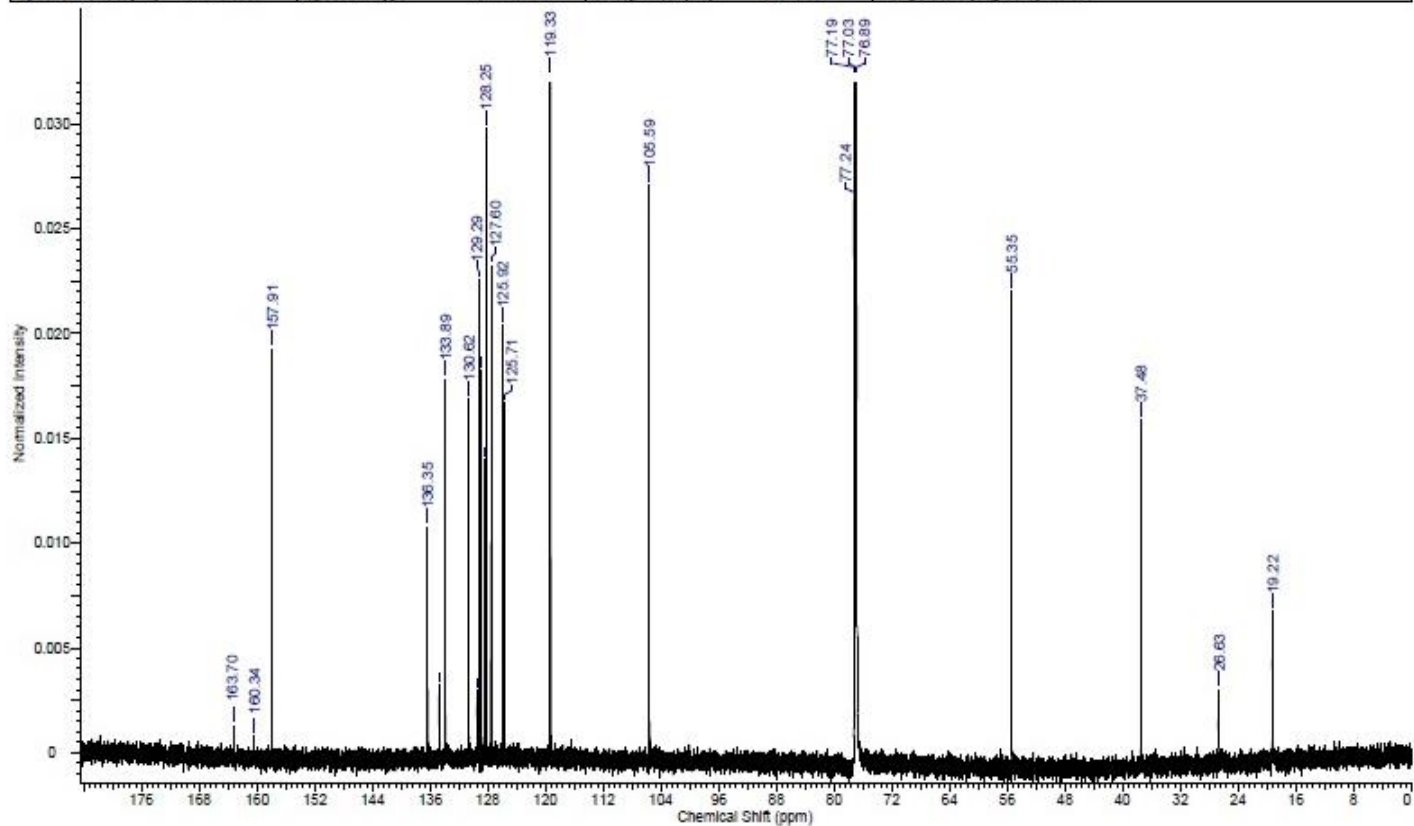

# Compound 13

4/28/2021 10:53:28 PM

|                        |                      |                   |                                       |                        |                      |
|------------------------|----------------------|-------------------|---------------------------------------|------------------------|----------------------|
| Acquisition Time (sec) | 0.6423               | Comment           | Dr. Abdusattar Sample 24-03 CDCL3     | Date                   | 28 Mar 2021 20:25:20 |
| Date Stamp             | 28 Mar 2021 20:25:20 | File Name         | C:\Users\hnp\Desktop\Naproxen NMR\NM8 | 28-03-2021\92fid       |                      |
| Frequency (MHz)        | 213.77               | Nucleus           | <sup>13</sup> C                       | Number of Transients   | 1024                 |
| Original Points Count  | 32768                | Owner             | nmr                                   | Points Count           | 32768                |
| Receiver Gain          | 186.93               | SW(cyclical) (Hz) | 51020.41                              | Pulse Sequence         | zgpg30               |
| Spectrum Offset (Hz)   | 21376.0332           | Solvent           | CHLOROFORM-d                          | Temperature (degree C) | 25.001               |
| Spectrum Type          | STANDARD             | Sweep Width (Hz)  | 51018.85                              |                        |                      |

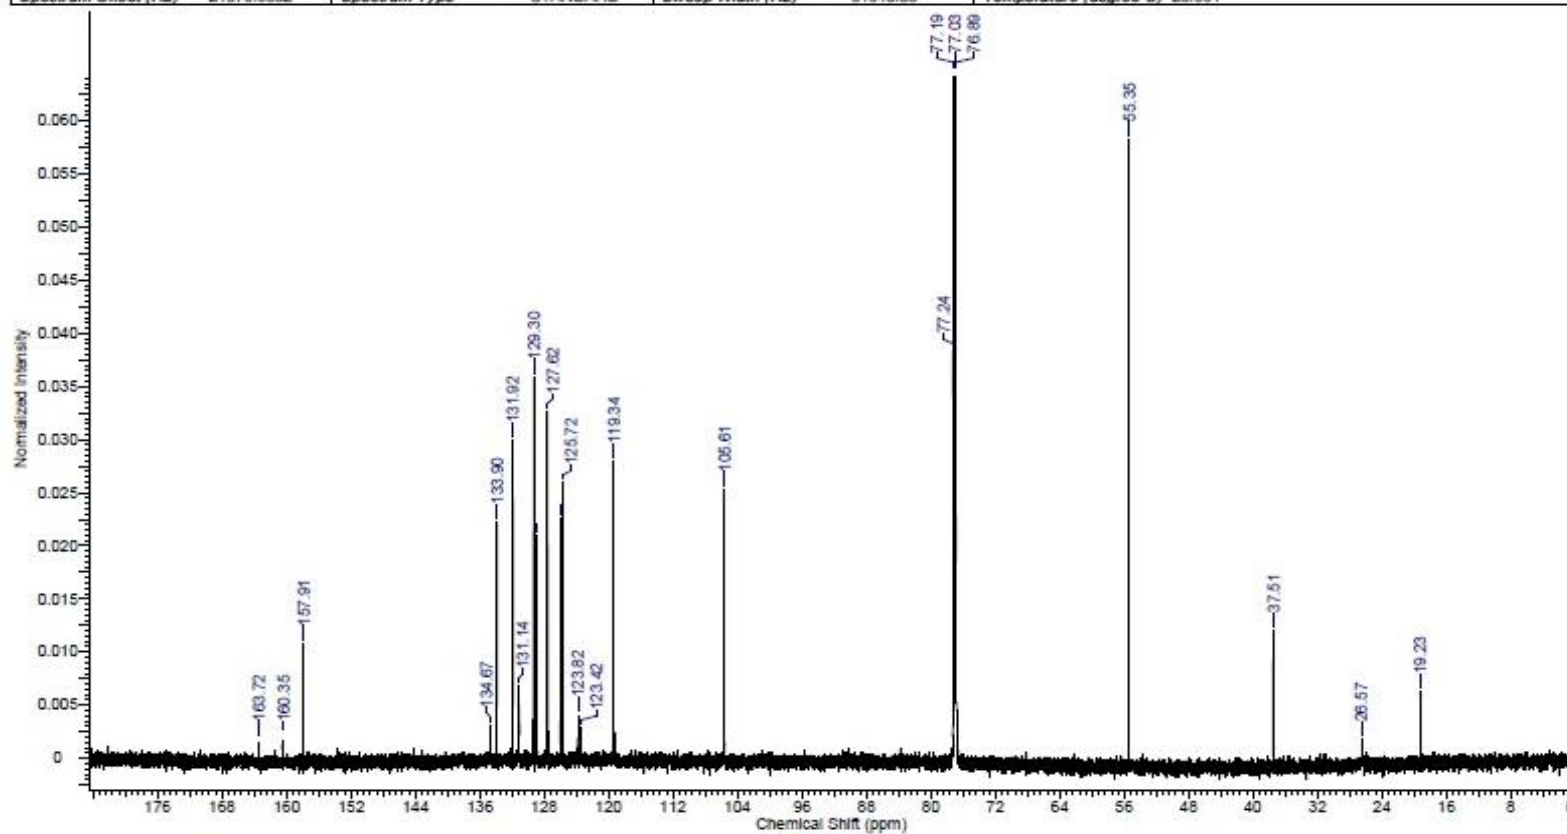



# Compound 14

4/28/2021 11:01:03 PM

|                        |                      |                   |                                  |                                                        |              |                        |                      |
|------------------------|----------------------|-------------------|----------------------------------|--------------------------------------------------------|--------------|------------------------|----------------------|
| Acquisition Time (sec) | 0.6423               | Comment           | Dr. Abdusattar Sampe 21-03 CDCL3 |                                                        |              | Date                   | 28 Mar 2021 17:45:20 |
| Date Stamp             | 28 Mar 2021 17:45:20 |                   | File Name                        | C:\Users\hp\Desktop\Naproxen NMR\NM5 28-03-2021\61.fid |              |                        |                      |
| Frequency (MHz)        | 213.77               | Nucleus           | <sup>13</sup> C                  | Number of Transients                                   | 1024         | Origin                 | spect                |
| Original Points Count  | 32768                | Owner             | nmr                              | Points Count                                           | 32768        | Pulse Sequence         | zgpg30               |
| Receiver Gain          | 186.93               | SW(cyclical) (Hz) | 51020.41                         | Solvent                                                | CHLOROFORM-d |                        |                      |
| Spectrum Offset (Hz)   | 21376.0332           | Spectrum Type     | STANDARD                         | Sweep Width (Hz)                                       | 51018.85     | Temperature (degree C) | 25.001               |

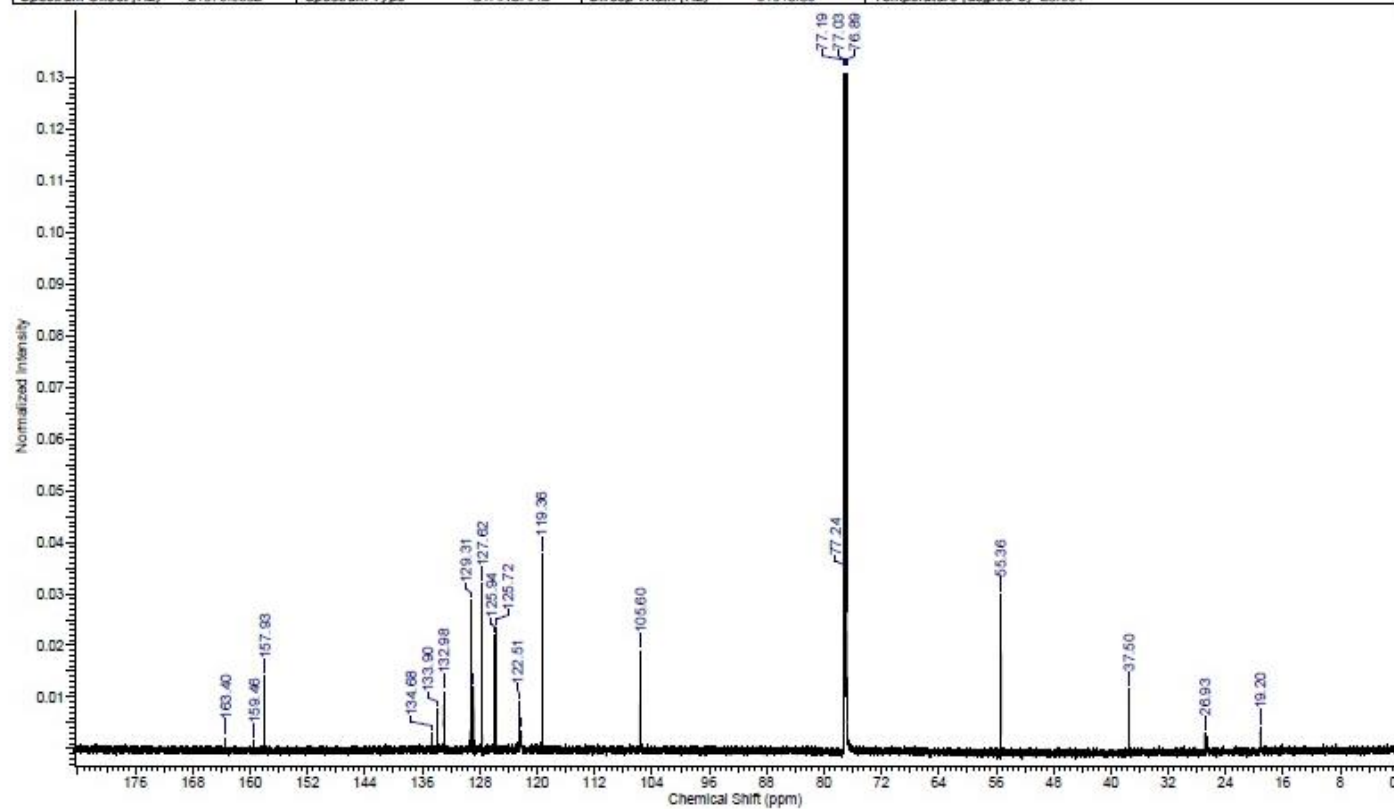

# Compound 15

4/28/2021 11:05:23 PM

|                        |                      |                   |                                       |                        |                      |
|------------------------|----------------------|-------------------|---------------------------------------|------------------------|----------------------|
| Acquisition Time (sec) | 0.6423               | Comment           | Dr. Abdusattar Sampe 22-03 CDCL3      | Date                   | 28 Mar 2021 18:15:12 |
| Date Stamp             | 28 Mar 2021 18:15:12 | File Name         | C:\Users\hpl\Desktop\Naproxen NMR\NM6 | 28-03-2021\71.fid      |                      |
| Frequency (MHz)        | 213.77               | Nucleus           | 13C                                   | Number of Transients   | 1024                 |
| Original Points Count  | 32768                | Owner             | nmr                                   | Points Count           | 32768                |
| Receiver Gain          | 186.93               | SW(cyclical) (Hz) | 51020.41                              | Solvent                | CHLOROFORM-d         |
| Spectrum Offset (Hz)   | 21376.0332           | Spectrum Type     | STANDARD                              | Sweep Width (Hz)       | 51018.85             |
|                        |                      |                   |                                       | Temperature (degree C) | 25.001               |

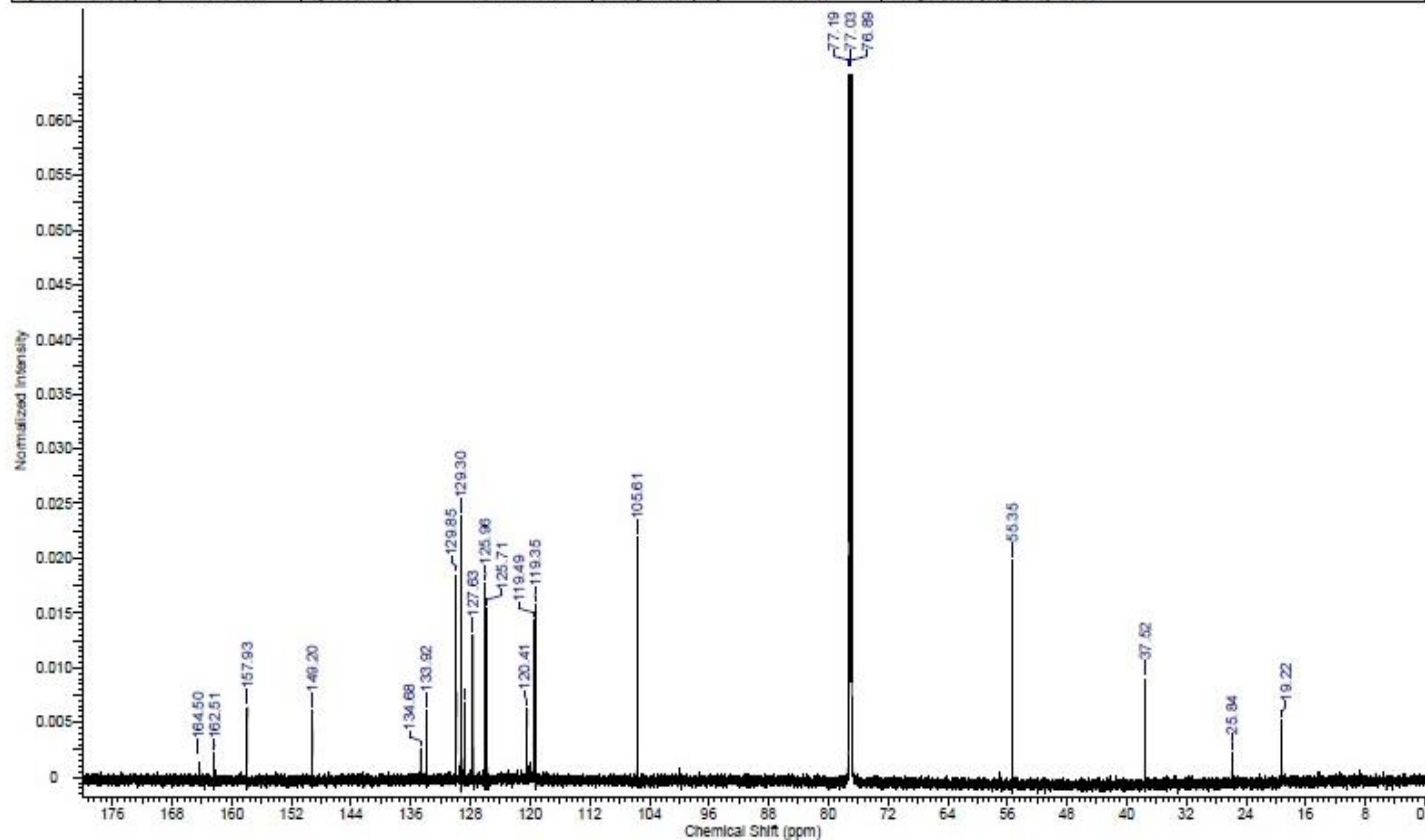

# Compound 16

4/28/2021 11:11:25 PM

|                        |                      |                   |                                  |                                                         |                      |
|------------------------|----------------------|-------------------|----------------------------------|---------------------------------------------------------|----------------------|
| Acquisition Time (sec) | 0.6423               | Comment           | Dr. Abdusattar Sampe 19-03 CDCL3 | Date                                                    | 28 Mar 2021 15:58:40 |
| Date Stamp             | 28 Mar 2021 15:58:40 |                   | File Name                        | C:\Users\hp\Desktop\Naproxen NMR\NMR3 28-03-2021\41.fid |                      |
| Frequency (MHz)        | 213.77               | Nucleus           | <sup>13</sup> C                  | Number of Transients                                    | 1024                 |
| Original Points Count  | 32768                | Owner             | nmr                              | Points Count                                            | 32768                |
| Receiver Gain          | 186.93               | SW(cyclical) (Hz) | 51020.41                         | Solvent                                                 | CHLOROFORM-d         |
| Spectrum Offset (Hz)   | 21376.0332           | Spectrum Type     | STANDARD                         | Sweep Width (Hz)                                        | 51018.85             |
|                        |                      |                   |                                  | Temperature (degree C)                                  | 24.999               |

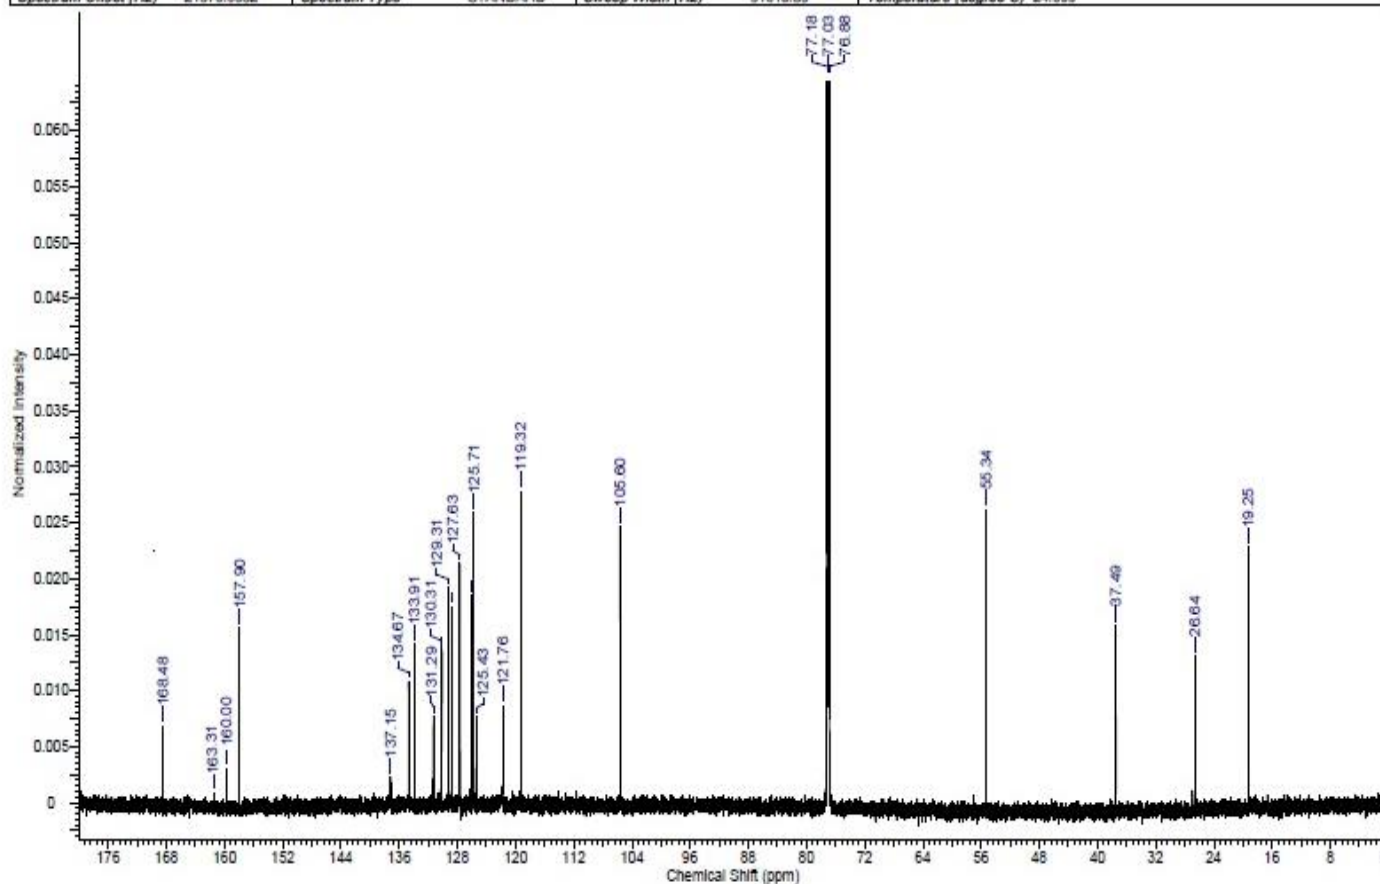

# Compound 19

4/28/2021 11:25:19 PM

|                        |                      |                   |                                                           |                        |                      |
|------------------------|----------------------|-------------------|-----------------------------------------------------------|------------------------|----------------------|
| Acquisition Time (sec) | 0.6423               | Comment           | Dr. Abdusattar Sampe 26-03 CDCL3                          | Date                   | 28 Mar 2021 22:12:00 |
| Date Stamp             | 28 Mar 2021 22:12:00 | File Name         | C:\Users\hpi\Desktop\Naproxen NMR\NM10 26-03-2021\112.fid |                        |                      |
| Frequency (MHz)        | 213.77               | Nucleus           | 13C                                                       | Number of Transients   | 1024                 |
| Original Points Count  | 32768                | Owner             | nmr                                                       | Points Count           | 32768                |
| Receiver Gain          | 186.93               | SW(cyclical) (Hz) | 51020.41                                                  | Solvent                | CHLOROFORM-d         |
| Spectrum Offset (Hz)   | 21376.0332           | Spectrum Type     | STANDARD                                                  | Sweep Width (Hz)       | 51018.85             |
|                        |                      |                   |                                                           | Temperature (degree C) | 25.001               |

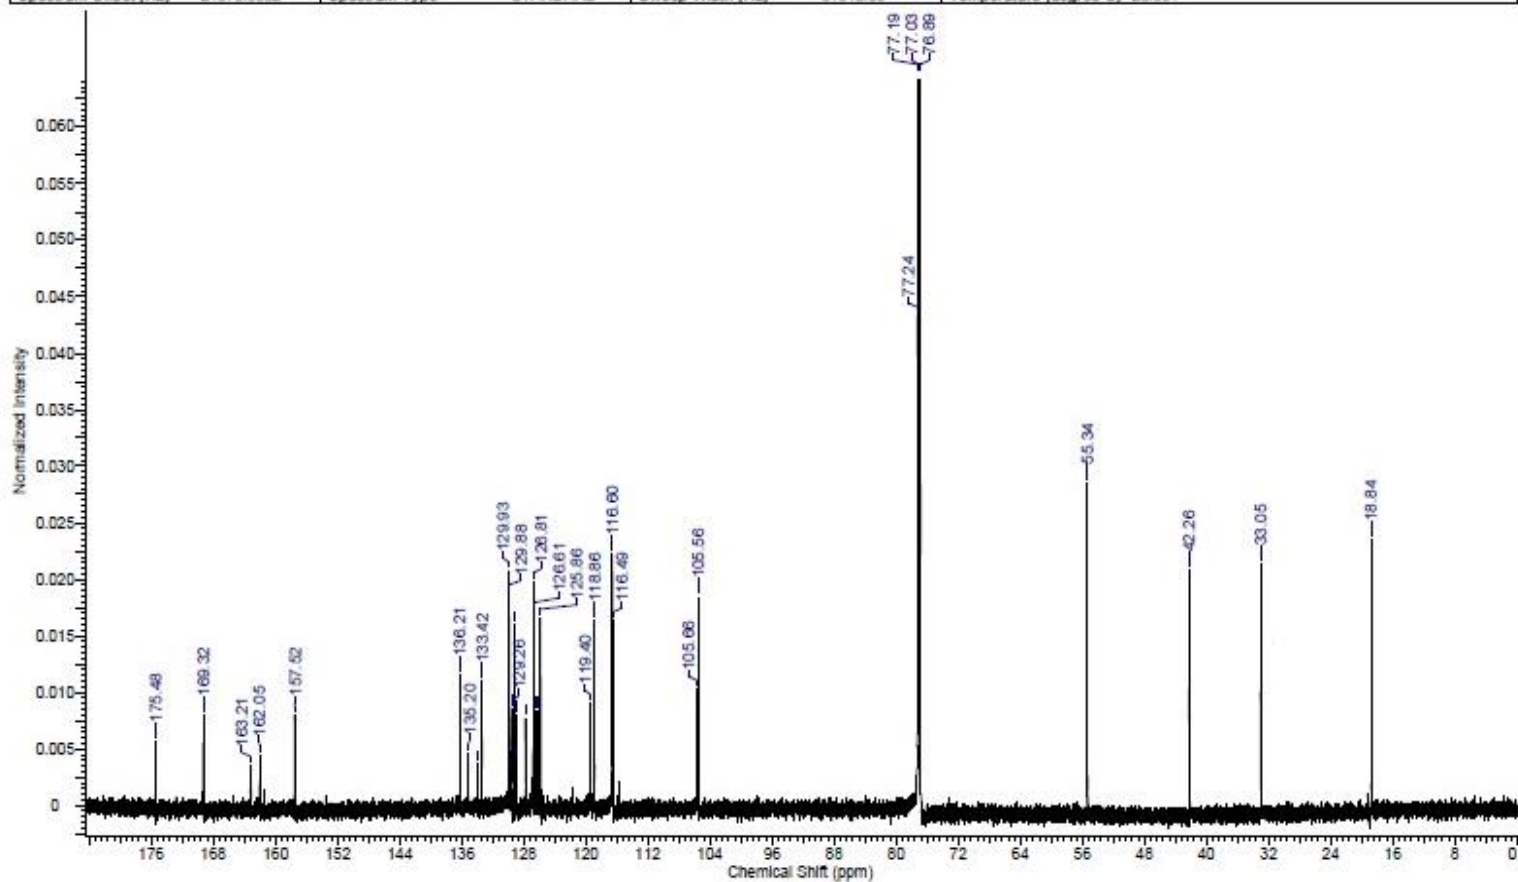

# Compound 20

4/28/2021 11:30:24 PM

|                        |                      |                   |                                   |                                                          |                      |
|------------------------|----------------------|-------------------|-----------------------------------|----------------------------------------------------------|----------------------|
| Acquisition Time (sec) | 0.6423               | Comment           | Dr. Abdusattar Sample 27-03 CDCL3 | Date                                                     | 28 Mar 2021 23:03:12 |
| Date Stamp             | 28 Mar 2021 23:03:12 |                   | File Name                         | C:\Users\hp\Desktop\Naproxen NMR\NM11 28-03-2021\122\fid |                      |
| Frequency (MHz)        | 213.77               | Nucleus           | <sup>13</sup> C                   | Number of Transients                                     | 1024                 |
| Original Points Count  | 32768                | Owner             | nmr                               | Points Count                                             | 32768                |
| Receiver Gain          | 186.93               | SW(cyclical) (Hz) | 51020.41                          | Solvent                                                  | CHLOROFORM-d         |
| Spectrum Offset (Hz)   | 21376.0332           | Spectrum Type     | STANDARD                          | Sweep Width (Hz)                                         | 51018.85             |
|                        |                      |                   |                                   | Temperature (degree C)                                   | 25.002               |

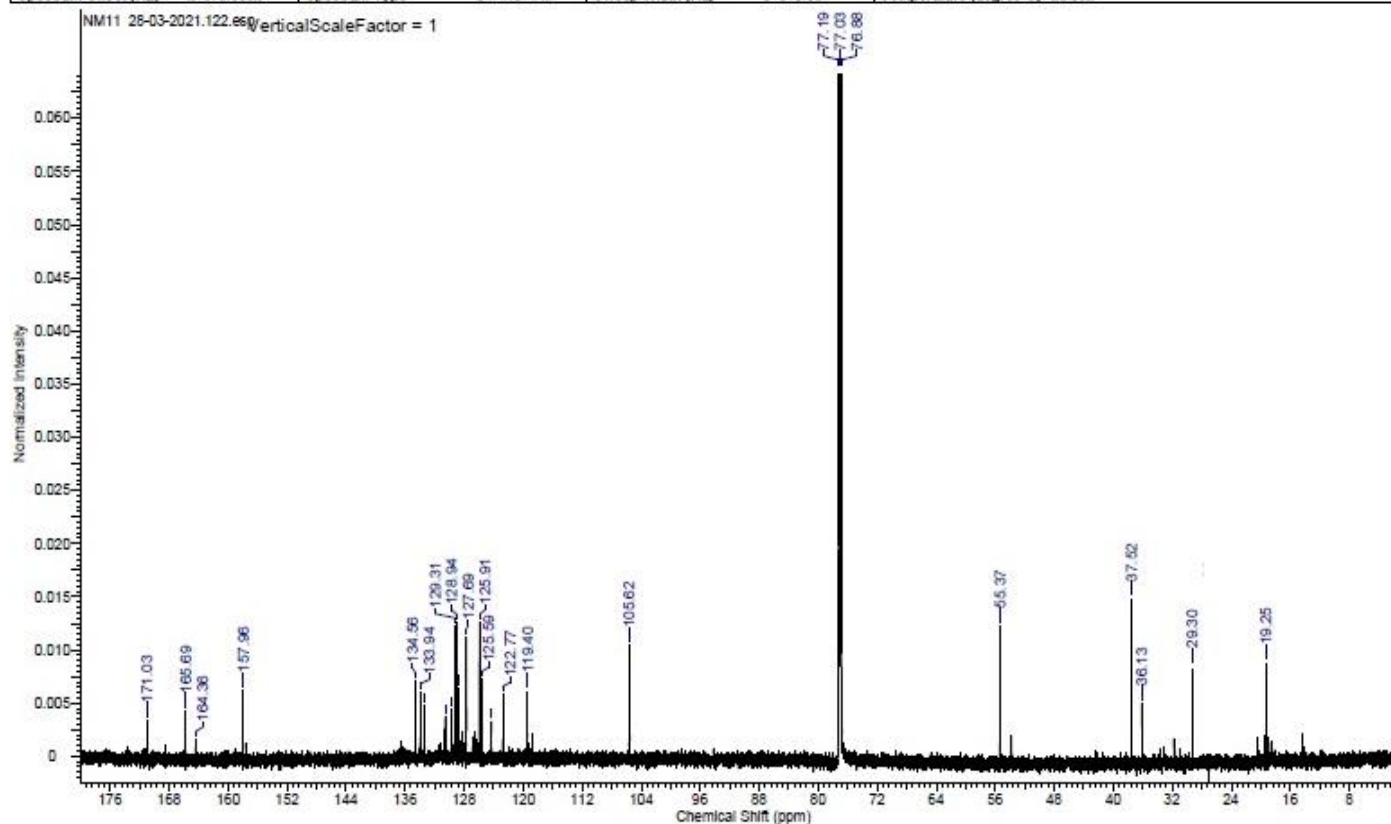

# Compound 21

4/28/2021 11:34:12 PM

|                        |                      |                    |                                    |                                                            |                      |
|------------------------|----------------------|--------------------|------------------------------------|------------------------------------------------------------|----------------------|
| Acquisition Time (sec) | 0.6423               | Comment            | Dr. Abdussattar Sample 28-03 CDCL3 | Date                                                       | 28 Mar 2021 23:56:32 |
| Date Stamp             | 28 Mar 2021 23:56:32 |                    | File Name                          | C:\Users\hpl\Desktop\Naproxen NMR\NM12 28-03-2021\1131\fid |                      |
| Frequency (MHz)        | 213.77               | Nucleus            | <sup>13</sup> C                    | Number of Transients                                       | 1024                 |
| Original Points Count  | 32768                | Owner              | nmr                                | Points Count                                               | 32768                |
| Receiver Gain          | 186.93               | SW (cyclical) (Hz) | 51020.41                           | Solvent                                                    | CHLOROFORM-d         |
| Spectrum Offset (Hz)   | 21376.0332           | Spectrum Type      | STANDARD                           | Sweep Width (Hz)                                           | 51018.85             |
|                        |                      |                    |                                    | Temperature (degree C)                                     | 25.002               |

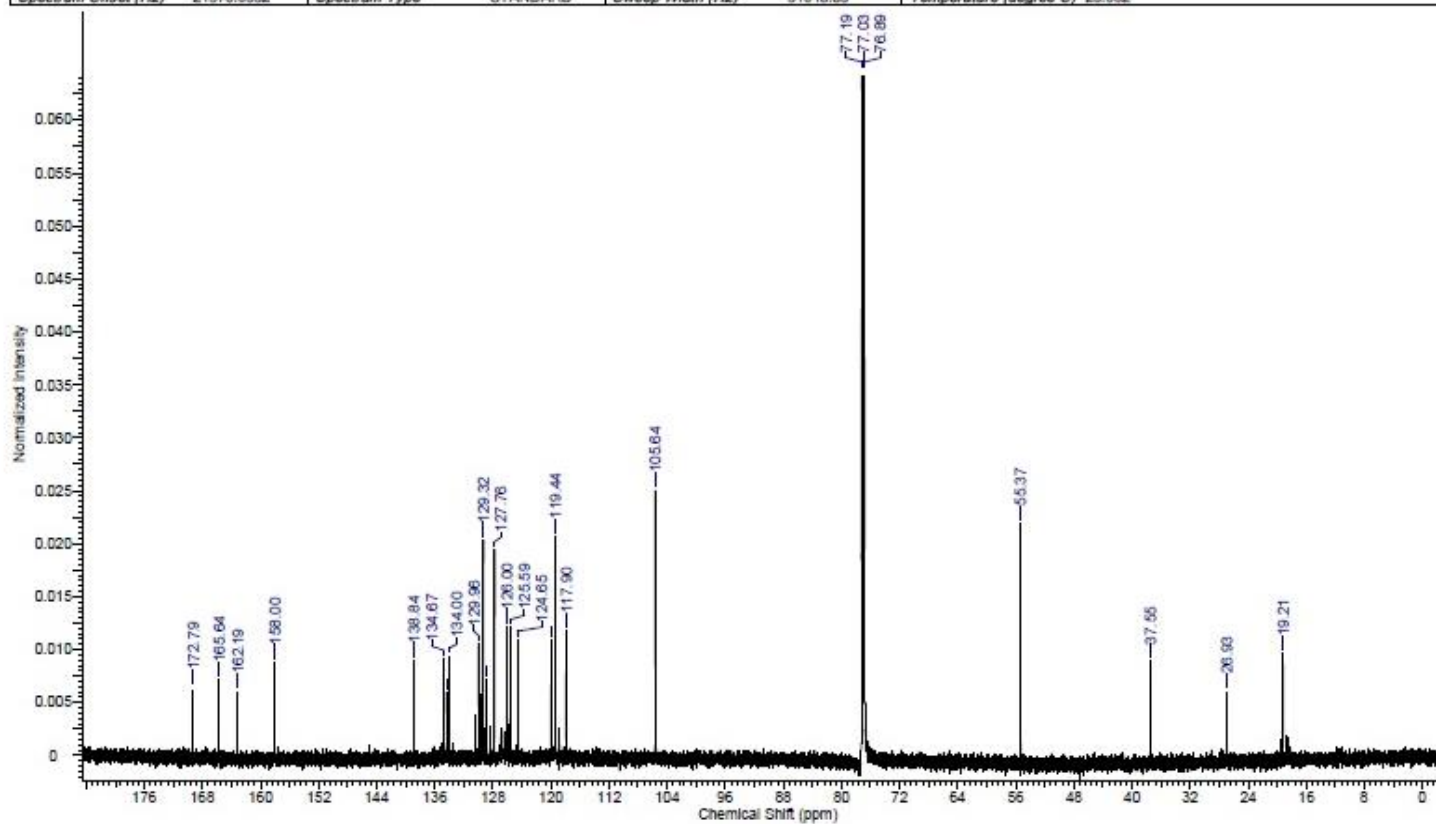

## Compound 22

3/31/2021 12:42:44 AM

|                        |                      |                   |                                   |                                                            |                      |
|------------------------|----------------------|-------------------|-----------------------------------|------------------------------------------------------------|----------------------|
| Acquisition Time (sec) | 0.6423               | Comment           | Dr. Abdusattar Sample 29-03 CDCL3 | Date                                                       | 29 Mar 2021 00:49:52 |
| Date Stamp             | 29 Mar 2021 00:49:52 |                   | File Name                         | C:\Users\hpi\Desktop\Naproxen NMR\NM13 28-03-2021\1141.fid |                      |
| Frequency (MHz)        | 213.77               | Nucleus           | <sup>13</sup> C                   | Number of Transients                                       | 1024                 |
| Original Points Count  | 32768                | Owner             | nmr                               | Points Count                                               | 32768                |
| Receiver Gain          | 186.93               | SW(cyclical) (Hz) | 51020.41                          | Solvent                                                    | CHLOROFORM-d         |
| Spectrum Offset (Hz)   | 21376.0332           | Spectrum Type     | STANDARD                          | Sweep Width (Hz)                                           | 51018.85             |
|                        |                      |                   |                                   | Temperature (degree C)                                     | 25.000               |

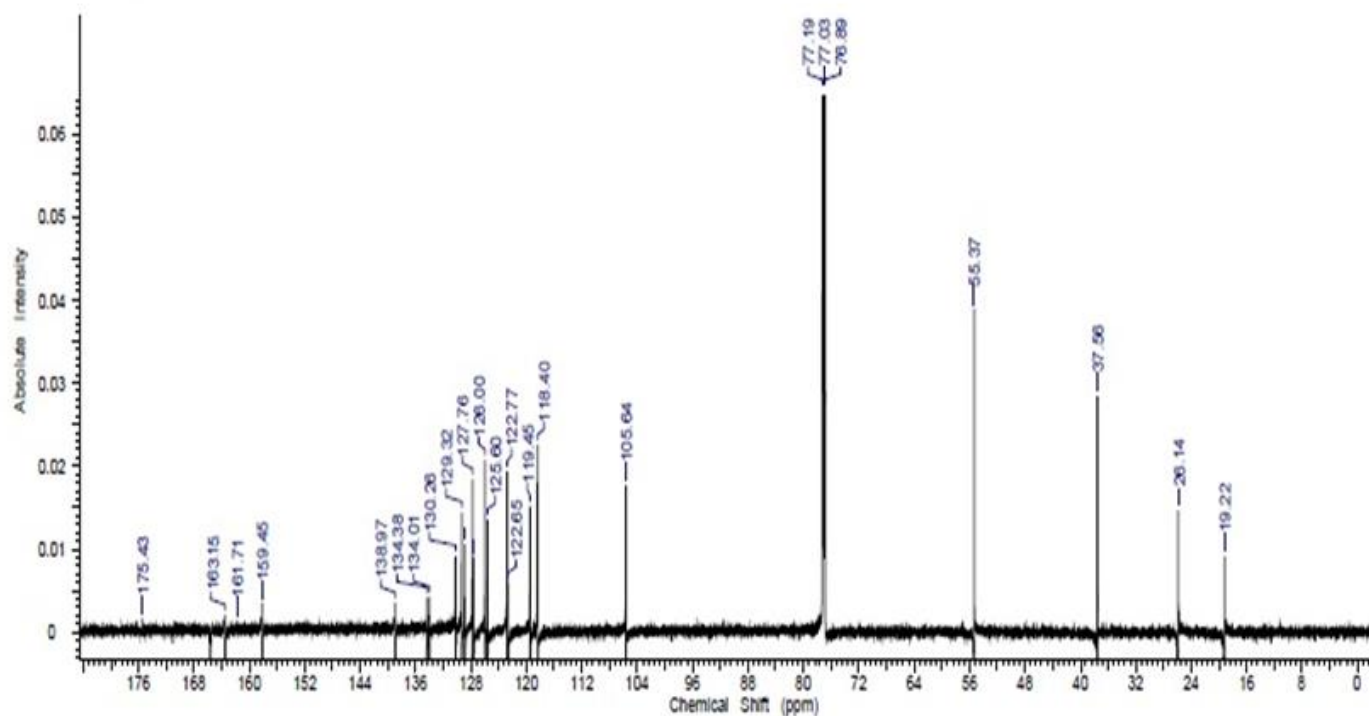



# Compound 23

4/16/2021 6:03:48 PM

|                          |                      |                   |                                                           |                        |                      |
|--------------------------|----------------------|-------------------|-----------------------------------------------------------|------------------------|----------------------|
| RMS of Noise 507469.5313 |                      |                   |                                                           |                        |                      |
| Acquisition Time (sec)   | 0.6423               | Comment           | Dr. Abdussattar Sampe 33-03 CDCL3                         | Date                   | 29 Mar 2021 04:21:04 |
| Date Stamp               | 29 Mar 2021 04:21:04 | File Name         | C:\Users\thp\Desktop\Naproxen NMR\ NM17 28-03-2021\181fid |                        |                      |
| Frequency (MHz)          | 213.77               | Nucleus           | <sup>13</sup> C                                           | Number of Transients   | 1024                 |
| Original Points Count    | 32768                | Owner             | nmr                                                       | Points Count           | 32768                |
| Receiver Gain            | 186.93               | SW(cyclical) (Hz) | 51020.41                                                  | Solvent                | CHLOROFORM-d         |
| Spectrum Offset (Hz)     | 21376.0332           | Spectrum Type     | STANDARD                                                  | Sweep Width (Hz)       | 51018.85             |
|                          |                      |                   |                                                           | Temperature (degree C) | 25.000               |

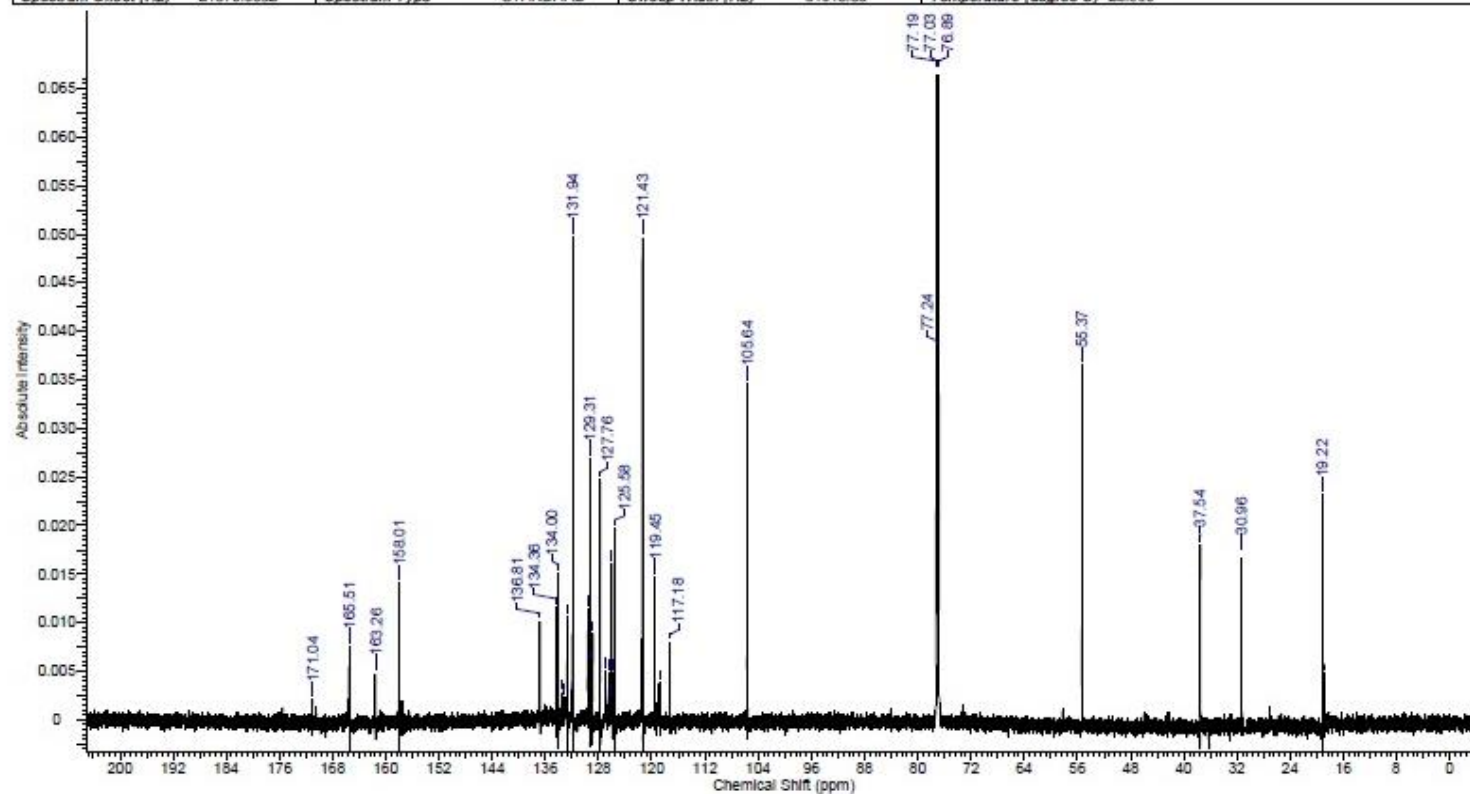



# Compound 24

4/17/2021 2:16:28 AM

|                        |                      |                  |                                  |                                                           |                      |
|------------------------|----------------------|------------------|----------------------------------|-----------------------------------------------------------|----------------------|
| Acquisition Time (sec) | 0.6423               | Comment          | Dr. Abdusattar Sampe 32-03 CDCL3 | Date                                                      | 29 Mar 2021 03:27:44 |
| Date Stamp             | 29 Mar 2021 03:27:44 |                  | File Name                        | C:\Users\hp\Desktop\Naproxen NMR\ NM16 28-03-2021\171.fid |                      |
| Frequency (MHz)        | 213.77               | Nucleus          | <sup>13</sup> C                  | Number of Transients                                      | 1024                 |
| Original Points Count  | 32768                | Owner            | nmr                              | Points Count                                              | 32768                |
| Receiver Gain          | 186.93               | SW (cycles) (Hz) | 51020.41                         | Solvent                                                   | CHLOROFORM-d         |
| Spectrum Offset (Hz)   | 21376.0332           | Spectrum Type    | STANDARD                         | Sweep Width (Hz)                                          | 51018.85             |
|                        |                      |                  |                                  | Temperature (degree C)                                    | 25.000               |

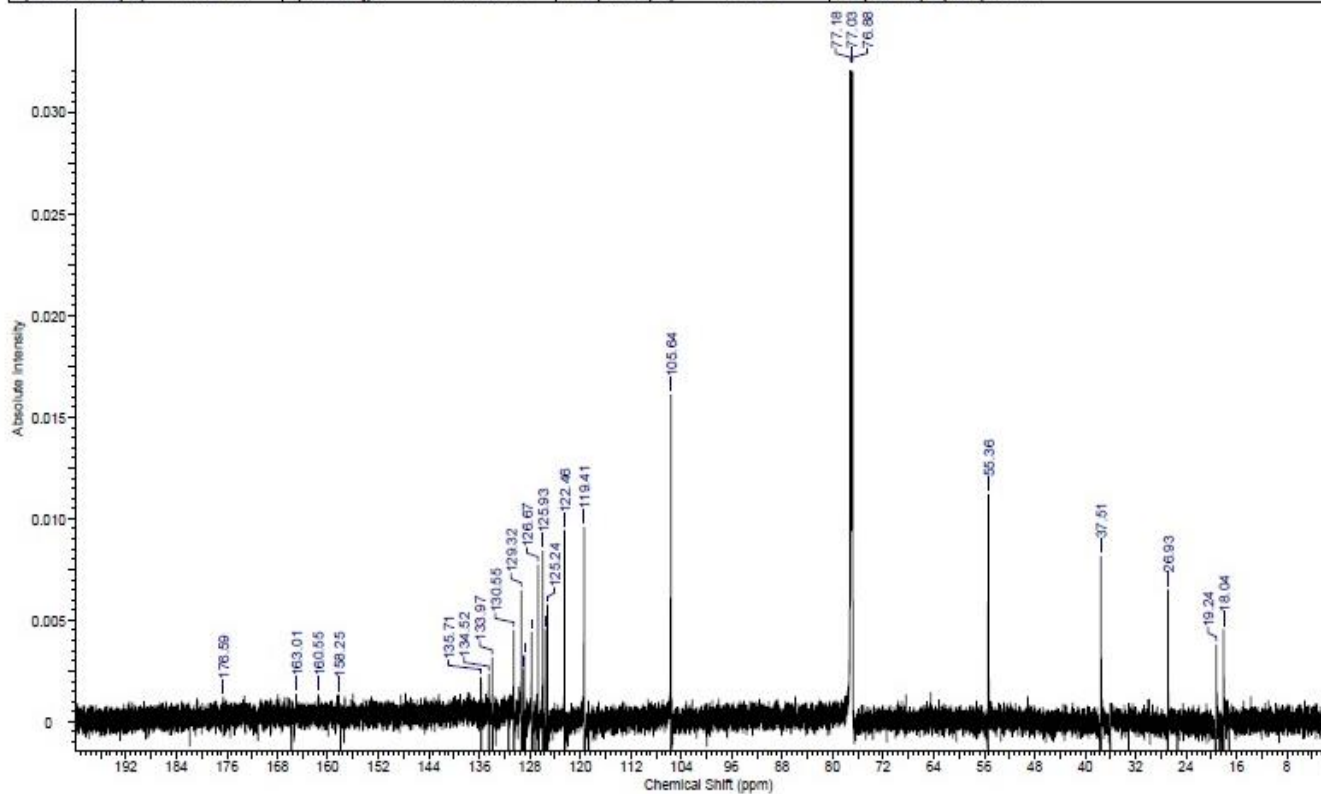

# Compound 25

4/28/2021 11:42:53 PM

|                        |                      |                   |                                        |                        |                      |
|------------------------|----------------------|-------------------|----------------------------------------|------------------------|----------------------|
| Acquisition Time (sec) | 0.6423               | Comment           | Dr. Abdusattar Sampe 31-03 CDCL3       | Date                   | 29 Mar 2021 02:36:32 |
| Date Stamp             | 29 Mar 2021 02:36:32 | File Name         | C:\Users\hpl\Desktop\Naproxen NMR\NM15 | 28-03-2021\161\fid     |                      |
| Frequency (MHz)        | 213.77               | Nucleus           | 13C                                    | Number of Transients   | 1024                 |
| Original Points Count  | 32768                | Owner             | nmr                                    | Points Count           | 32768                |
| Receiver Gain          | 186.93               | SW(cyclical) (Hz) | 51020.41                               | Solvent                | CHLOROFORM-d         |
| Spectrum Offset (Hz)   | 21376.0332           | Spectrum Type     | STANDARD                               | Sweep Width (Hz)       | 51018.85             |
|                        |                      |                   |                                        | Temperature (degree C) | 25.001               |

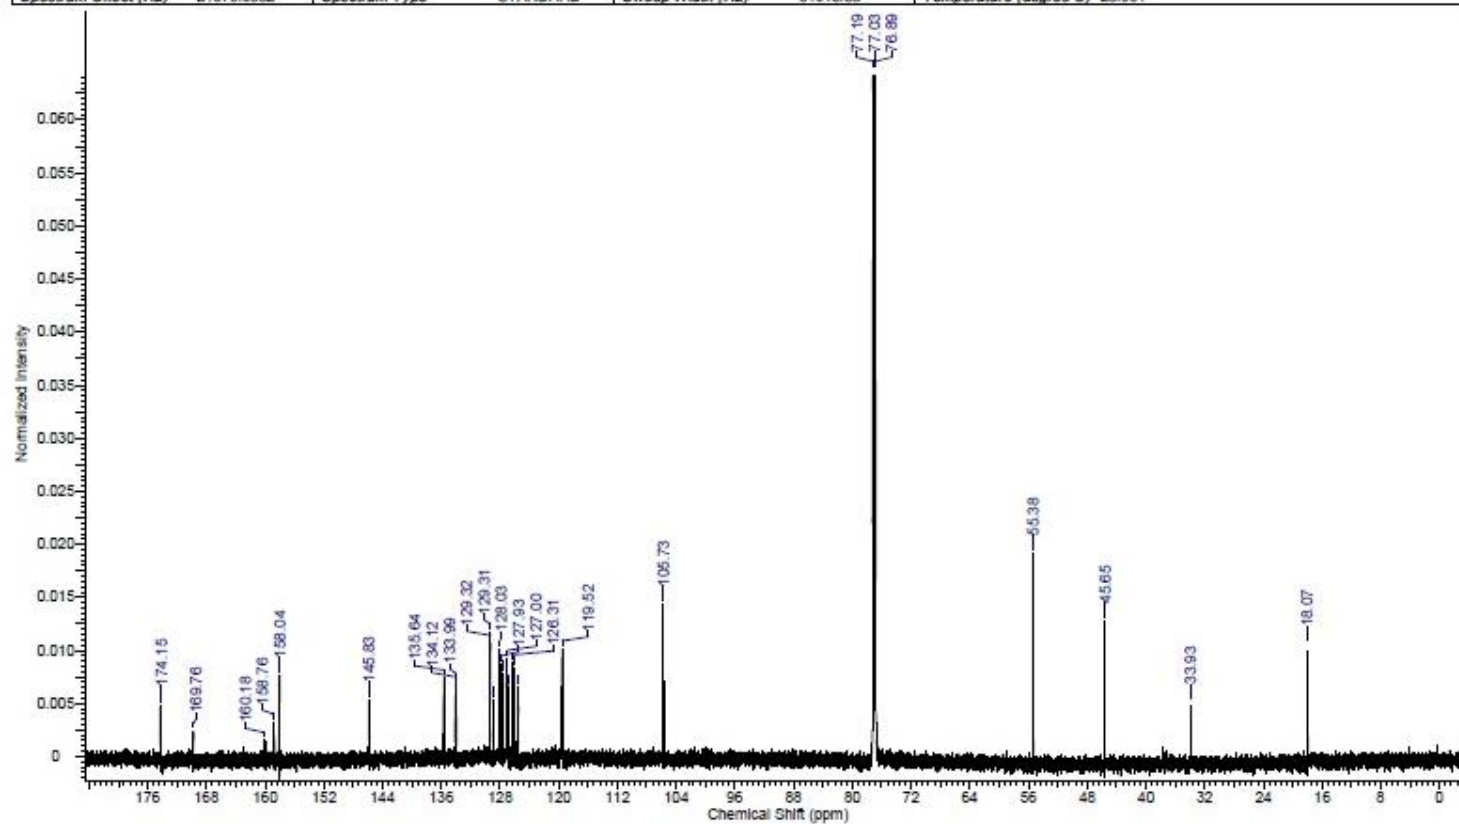

# Compound 26

4/17/2021 1:29:47 AM

|                        |                      |                    |                                                           |                        |                      |
|------------------------|----------------------|--------------------|-----------------------------------------------------------|------------------------|----------------------|
| Acquisition Time (sec) | 0.6423               | Comment            | Dr. Abdusattar Sampe 30-03 CDCL3                          | Date                   | 29 Mar 2021 01:43:12 |
| Date Stamp             | 29 Mar 2021 01:43:12 | File Name          | C:\Users\hp\Desktop\Naproxen NMR\NM14 26-03-2021\1511.fid |                        |                      |
| Frequency (MHz)        | 213.77               | Nucleus            | <sup>13</sup> C                                           | Number of Transients   | 1024                 |
| Original Points Count  | 32768                | Owner              | nmr                                                       | Points Count           | 32768                |
| Receiver Gain          | 186.93               | SW (cyclical) (Hz) | 51020.41                                                  | Pulse Sequence         | zgpg30               |
| Spectrum Offset (Hz)   | 21376.0332           | Solvent            | CHLOROFORM-d                                              | Temperature (degree C) | 25.001               |
|                        |                      | Spectrum Type      | STANDARD                                                  | Sweep Width (Hz)       | 51018.85             |

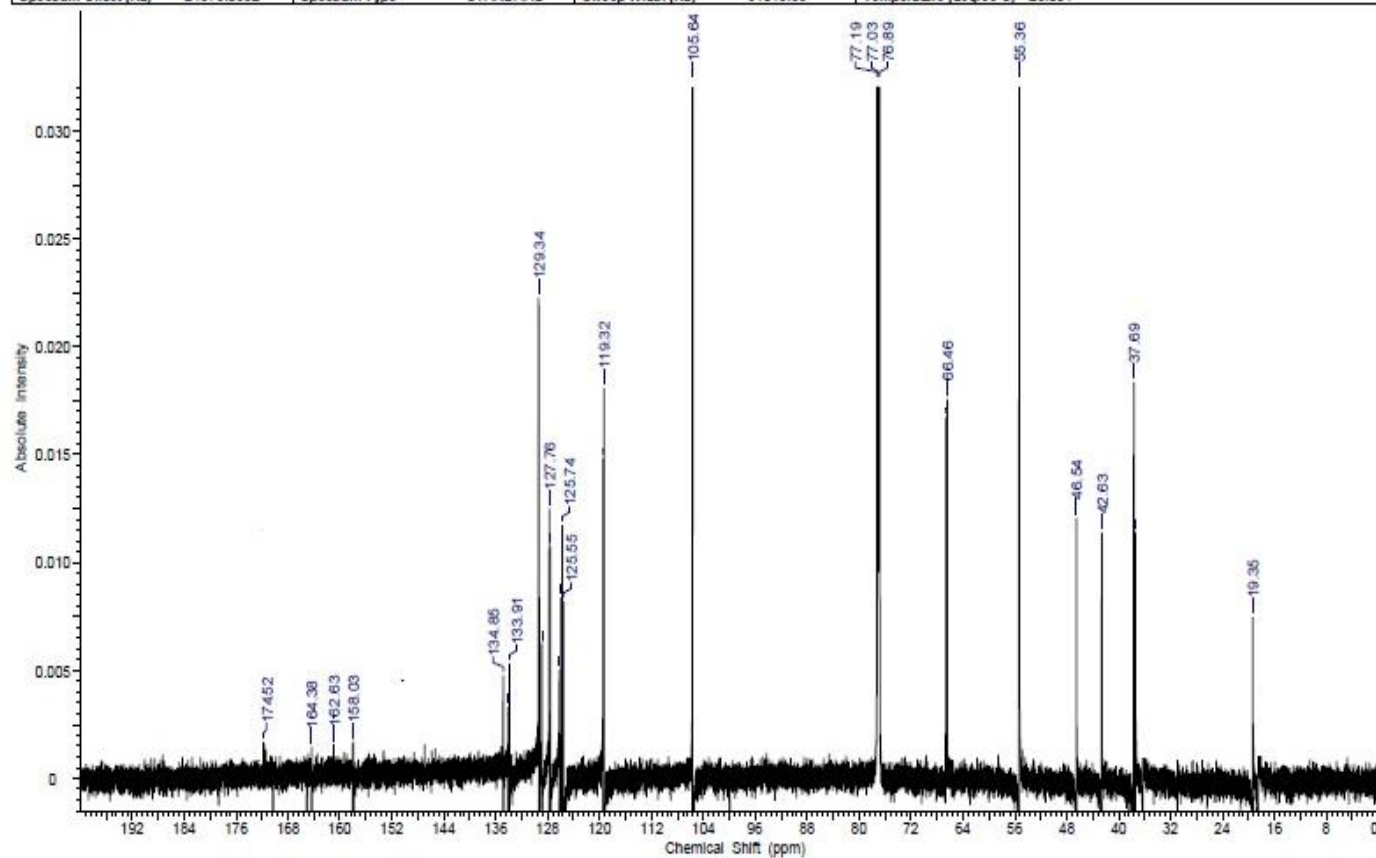

Figure S35-S50:- Mass spectra of compounds

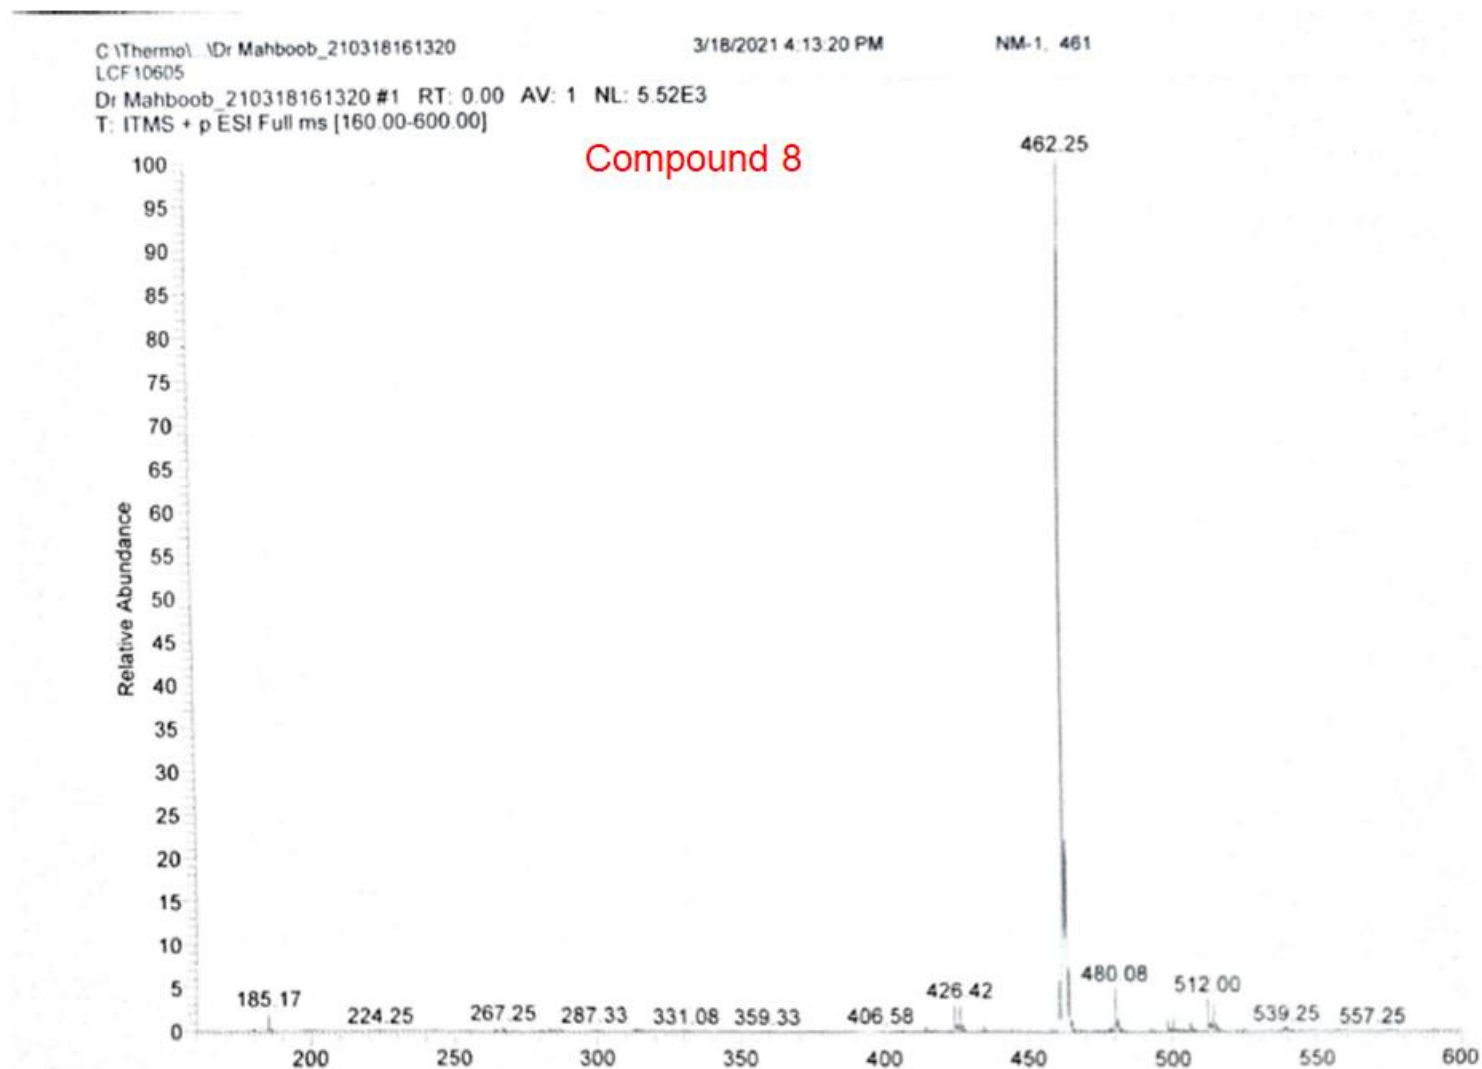

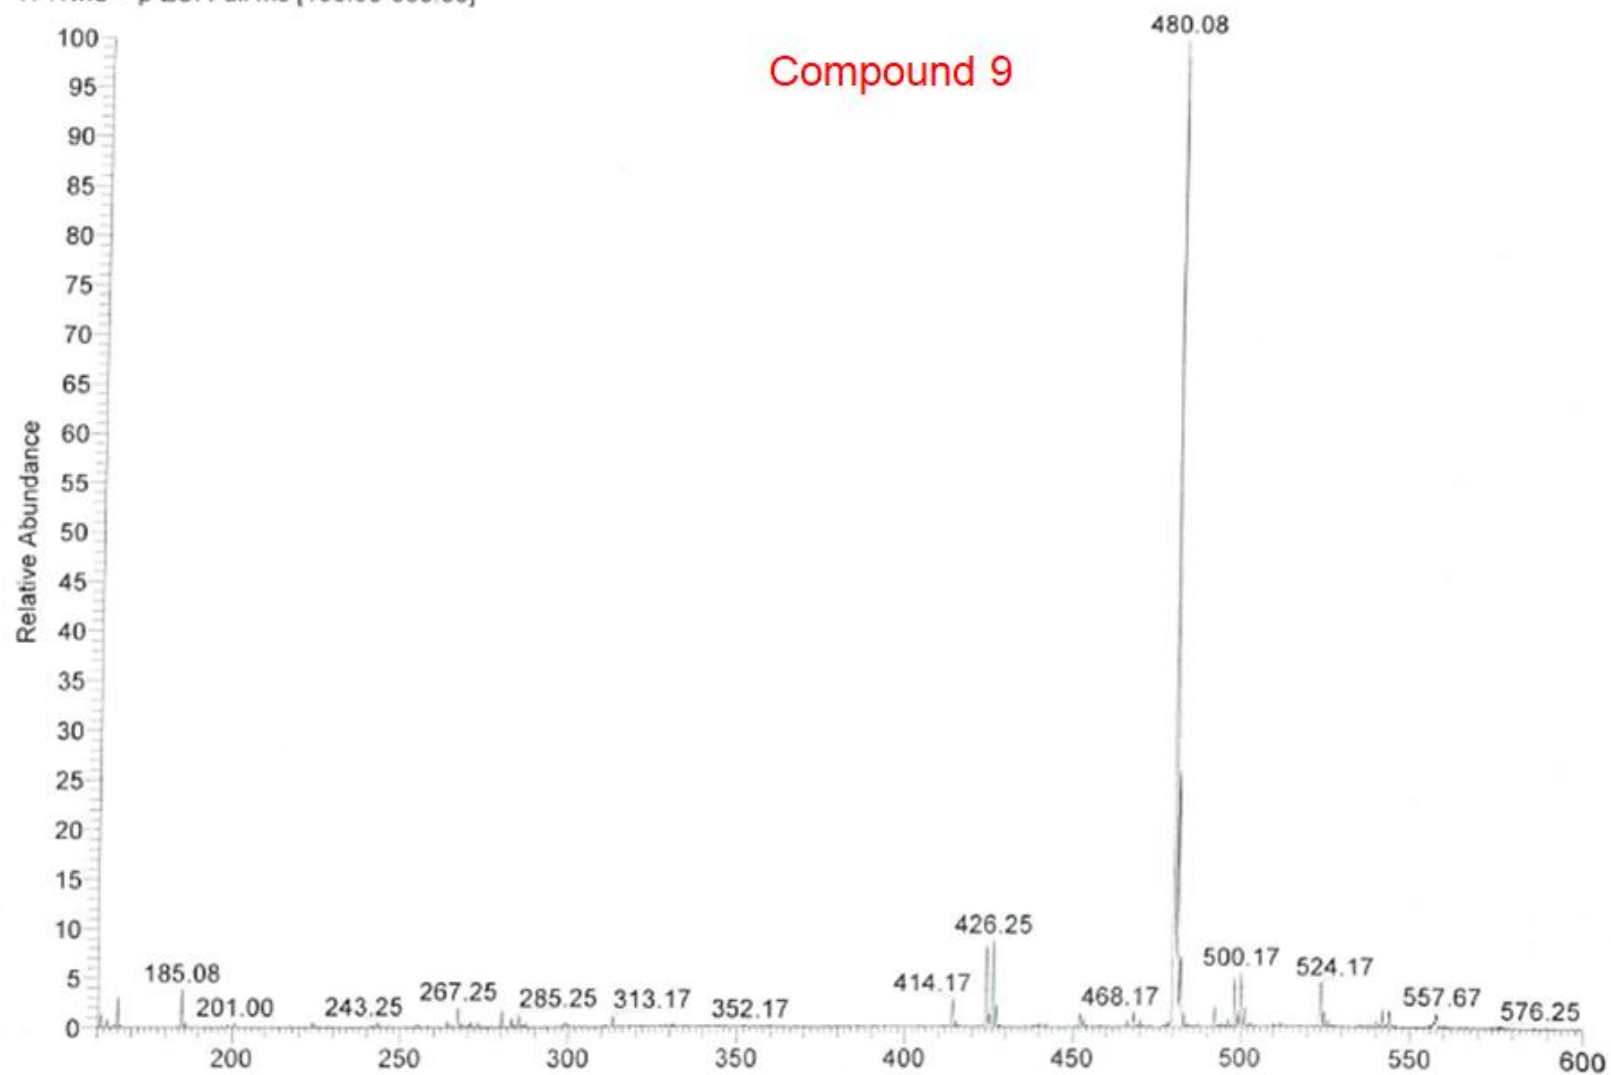

C:\Thermo\...\\Dr Mahboob\_210318162611

3/18/2021 4:26:12 PM

NM-7, 478

LCF10605

Dr Mahboob\_210318162611 #1 RT: 0.00 AV: 1 NL: 8.64E2

T: ITMS + p ESI Full ms [160.00-600.00]

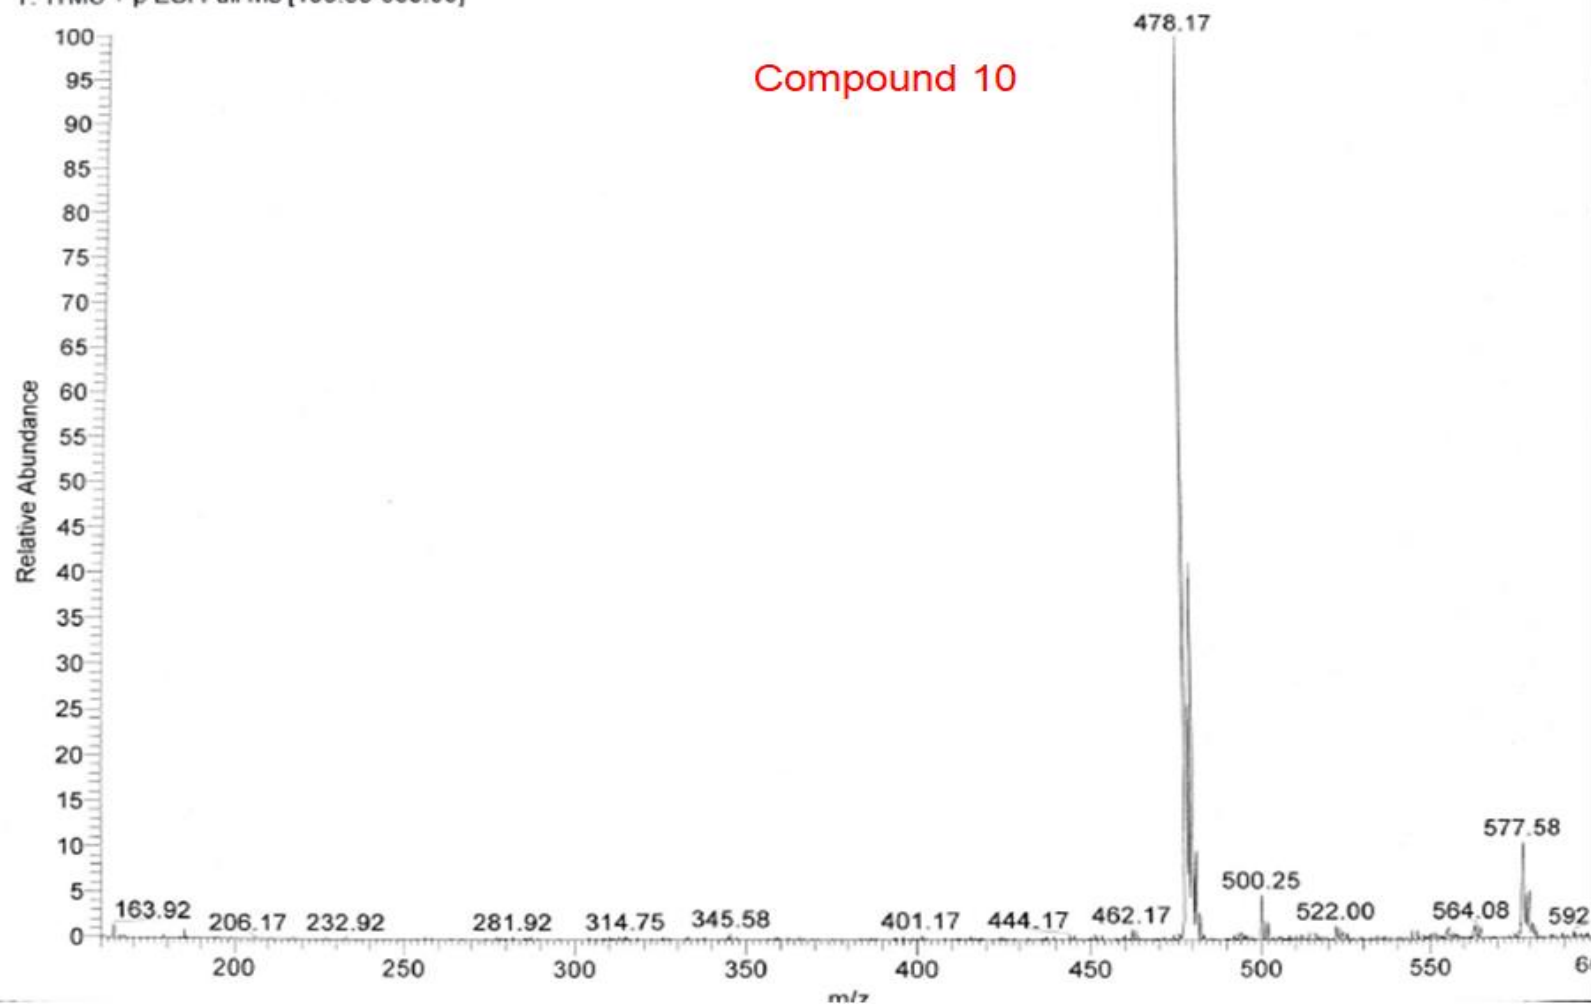

C:\Thermo1\Dr Mahboob\_210318163751  
LCF10805

3/18/2021 4:37:51 PM

NM-9. 478

Dr Mahboob\_210318163751 #1 RT: 0.00 AV: 1 NL: 6.11E3  
T: ITMS + p ESI Full ms (160.00-600.00)

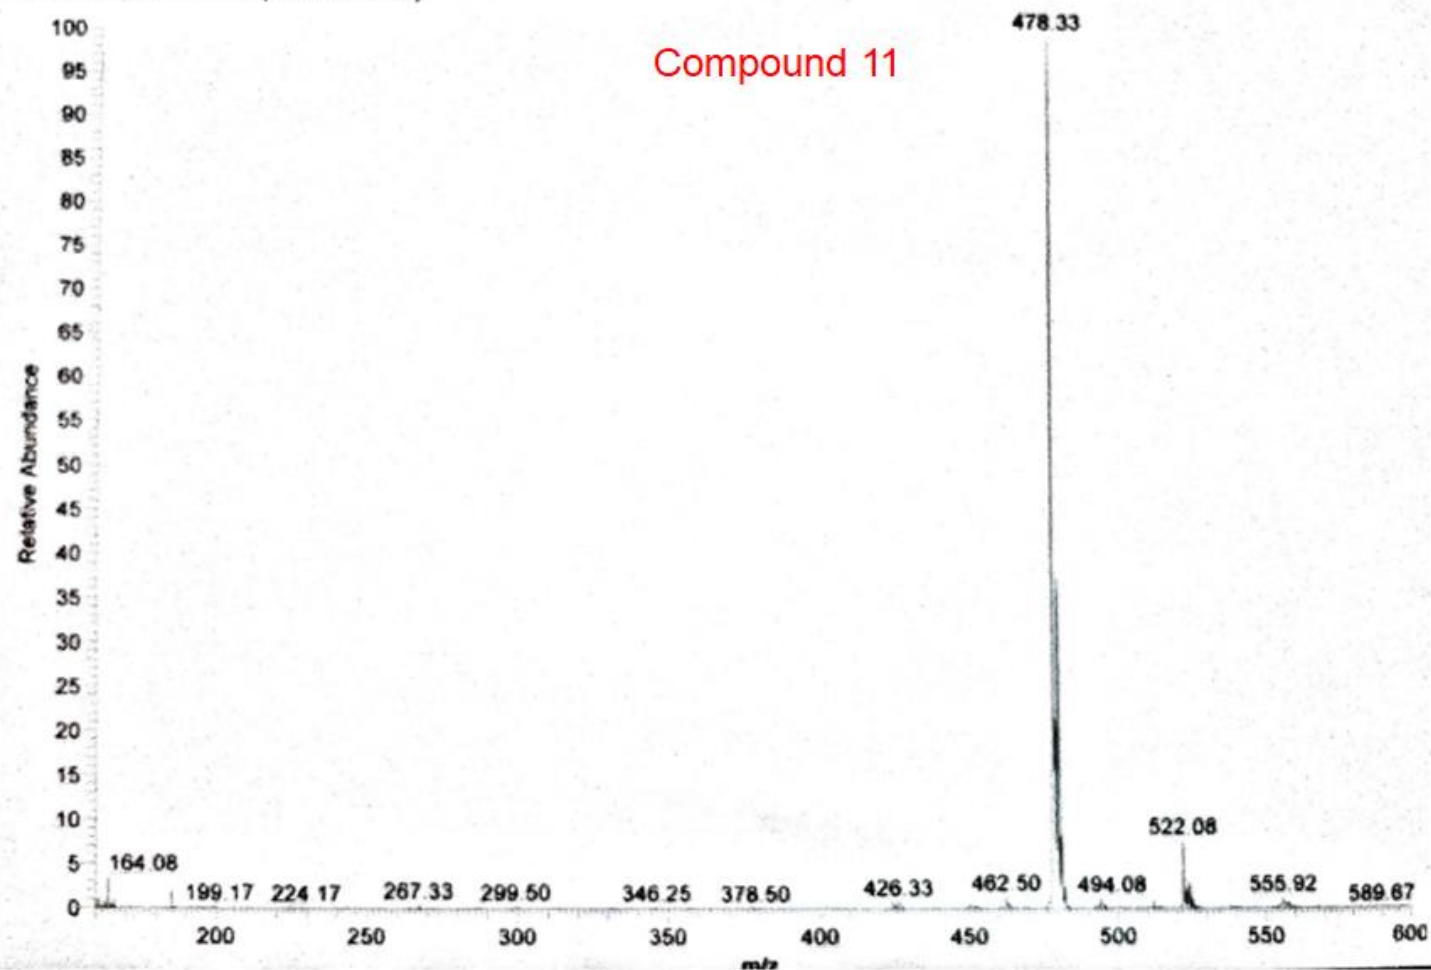



C:\Thermo\...Dr Mahboob\_210318160150  
LCF10605

3/18/2021 4:01:51 PM

NM-2, 512

Dr Mahboob\_210318160150 #1 RT: 0.00 AV: 1 NL: 6.13E2  
T: ITMS + p ESI Full ms [160.00-600.00]

Compound 12

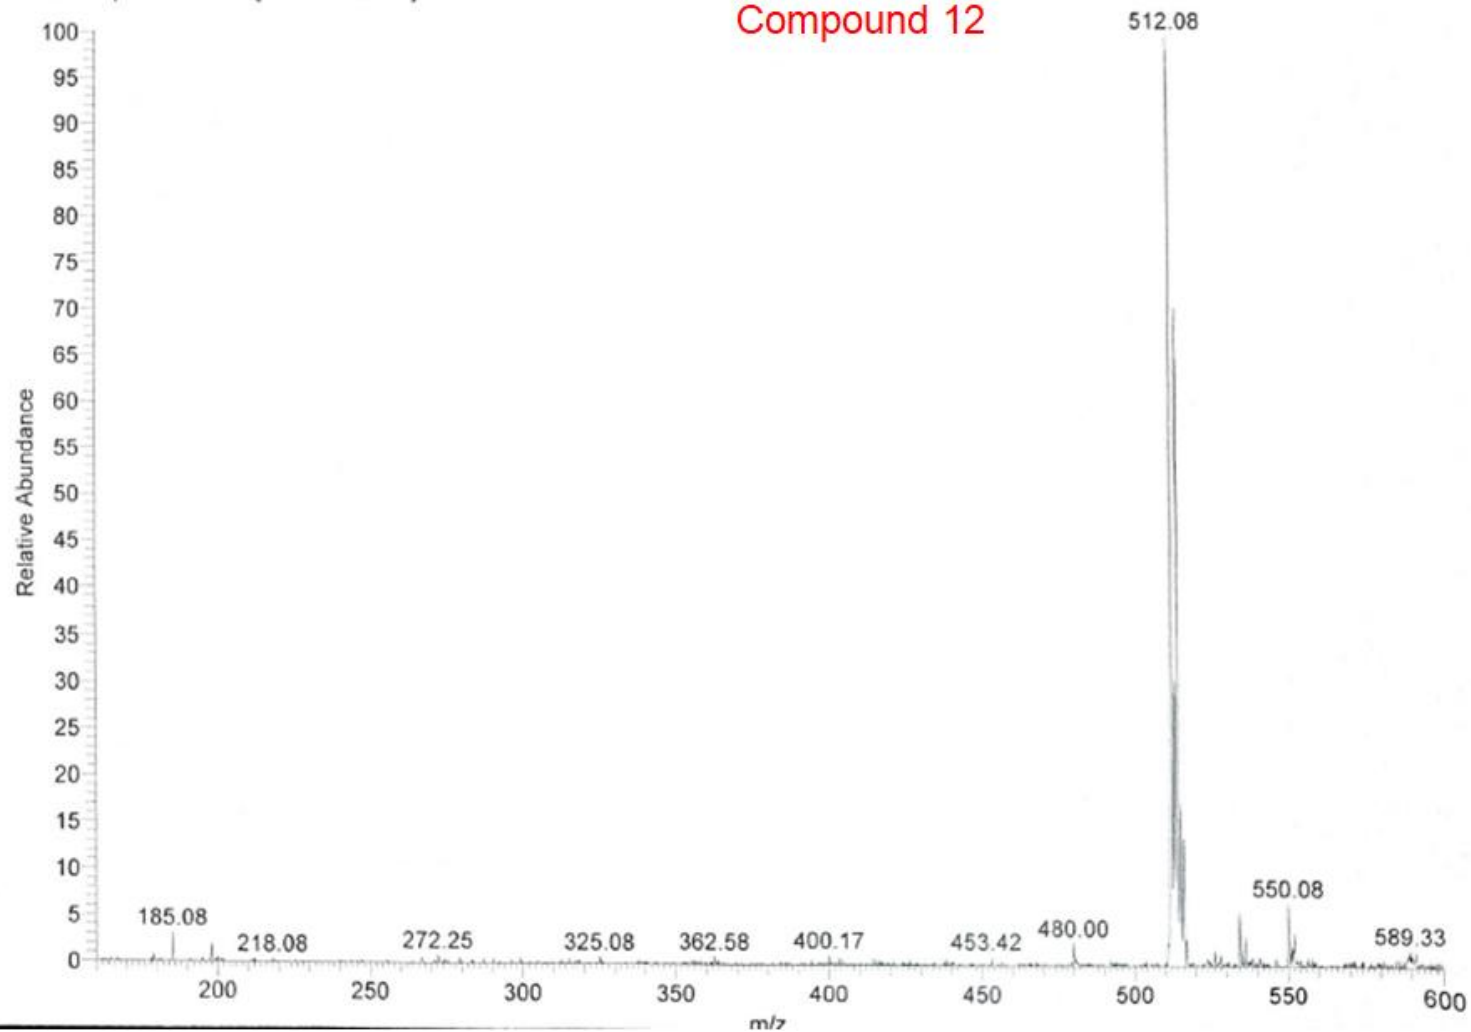

C:\Thermo\1\Dr Mahboob\_210318153056  
LCF10605

3/18/2021 3:30:56 PM

NM-8, 522

Dr Mahboob\_210318153056 #1 RT: 0.00 AV: 1 NL: 6.73E2  
T: ITMS + p ESI Full ms [150.00-600.00]

# Compound 13

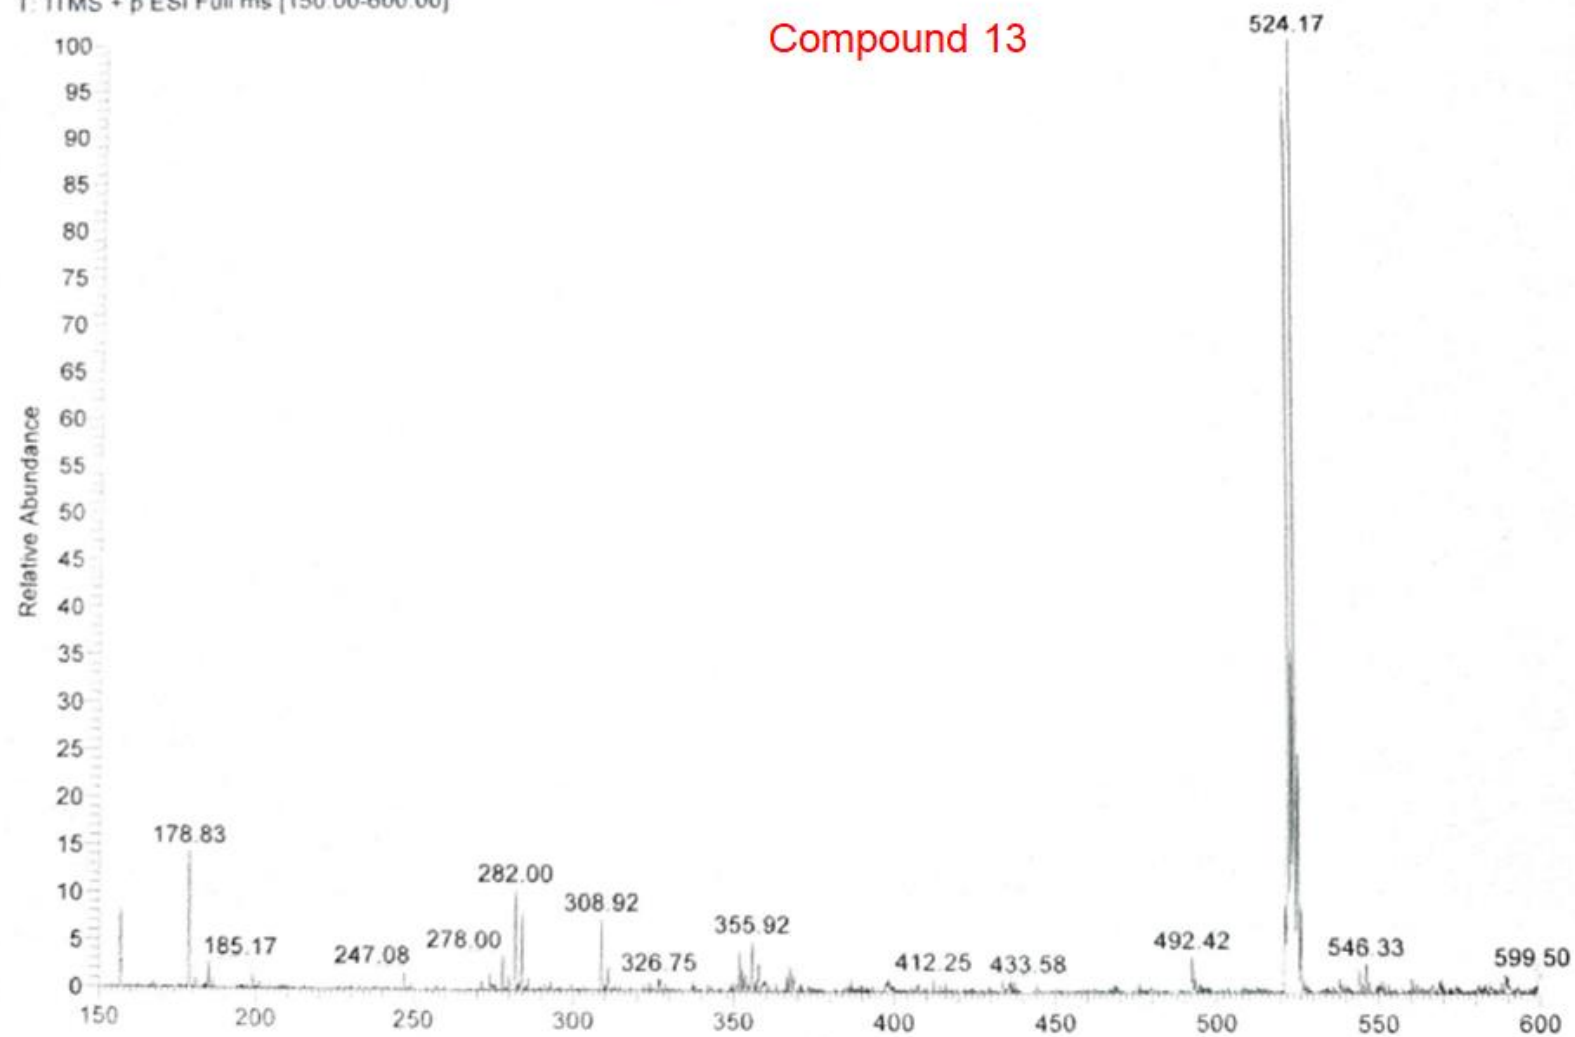

C:\Thermo\...\\Dr Mahboob\_210318162030  
LCF10605

3/18/2021 4:20:30 PM

NM-5, 522

Dr Mahboob\_210318162030 #1 RT: 0.00 AV: 1 NL: 1.97E3  
T: ITMS + p ESI Full ms [160.00-600.00]

Compound 14

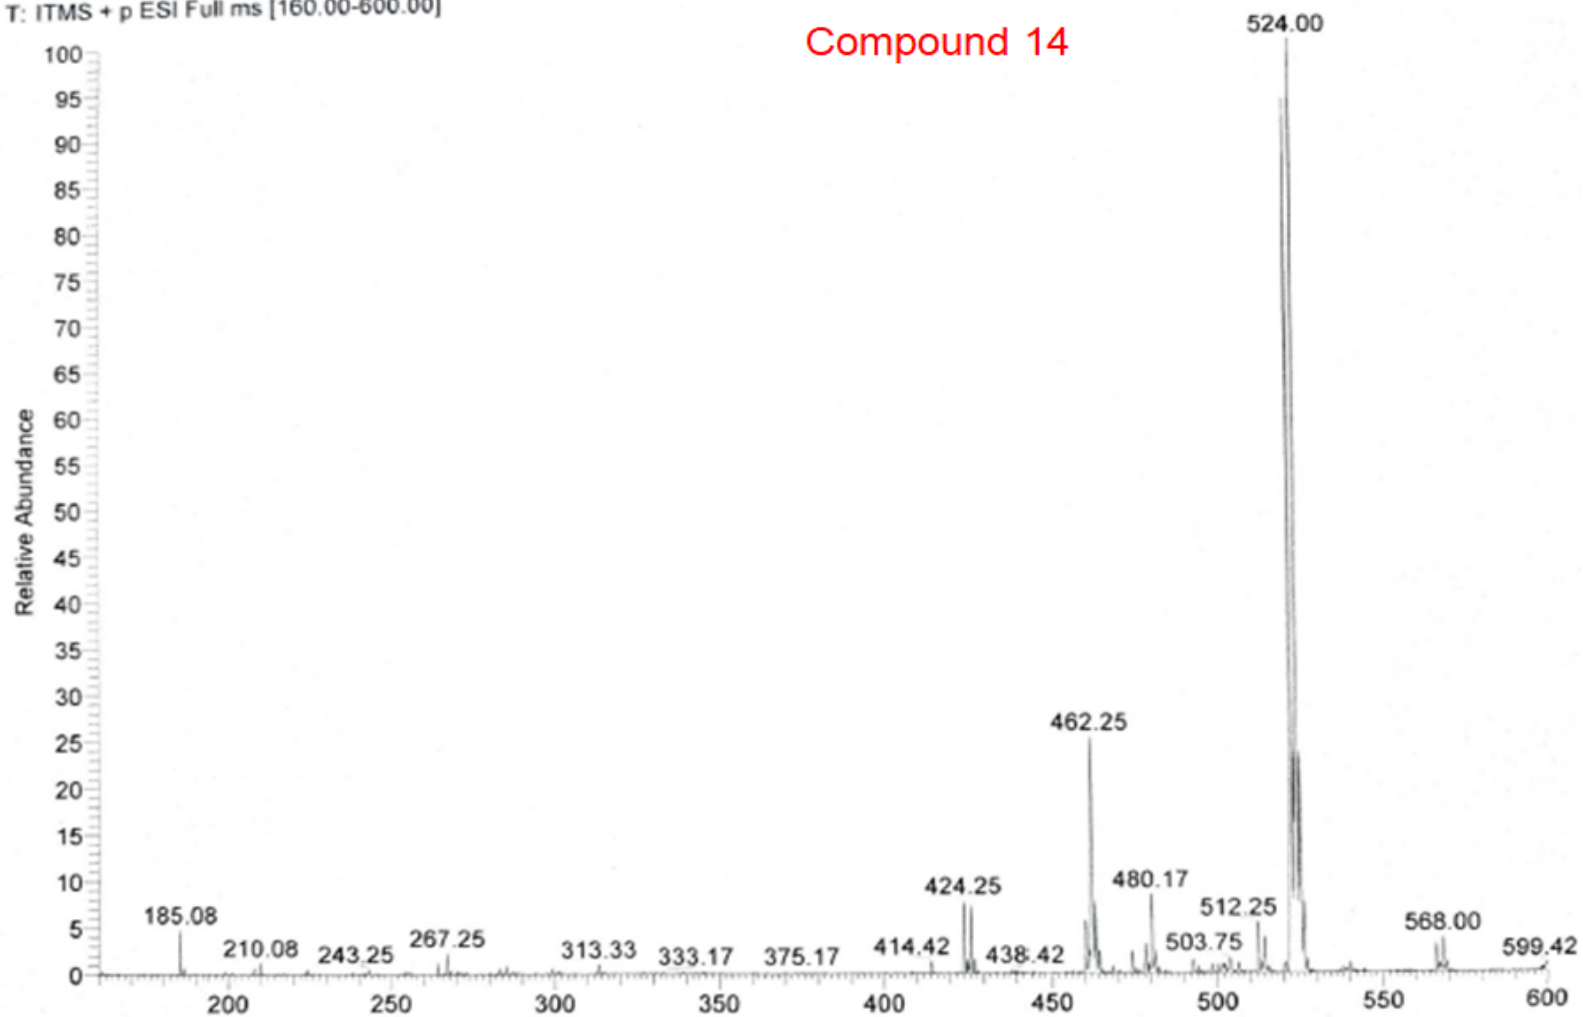

C:\Thermo\1\Dr Mahboob\_210318160733  
LCF10605

3/18/2021 4:07:34 PM

NM-6, 459

Dr Mahboob\_210318160733 #1 RT: 0.00 AV: 1 NL: 3.70E3  
T: ITMS + p ESI Full ms [160.00-600.00]

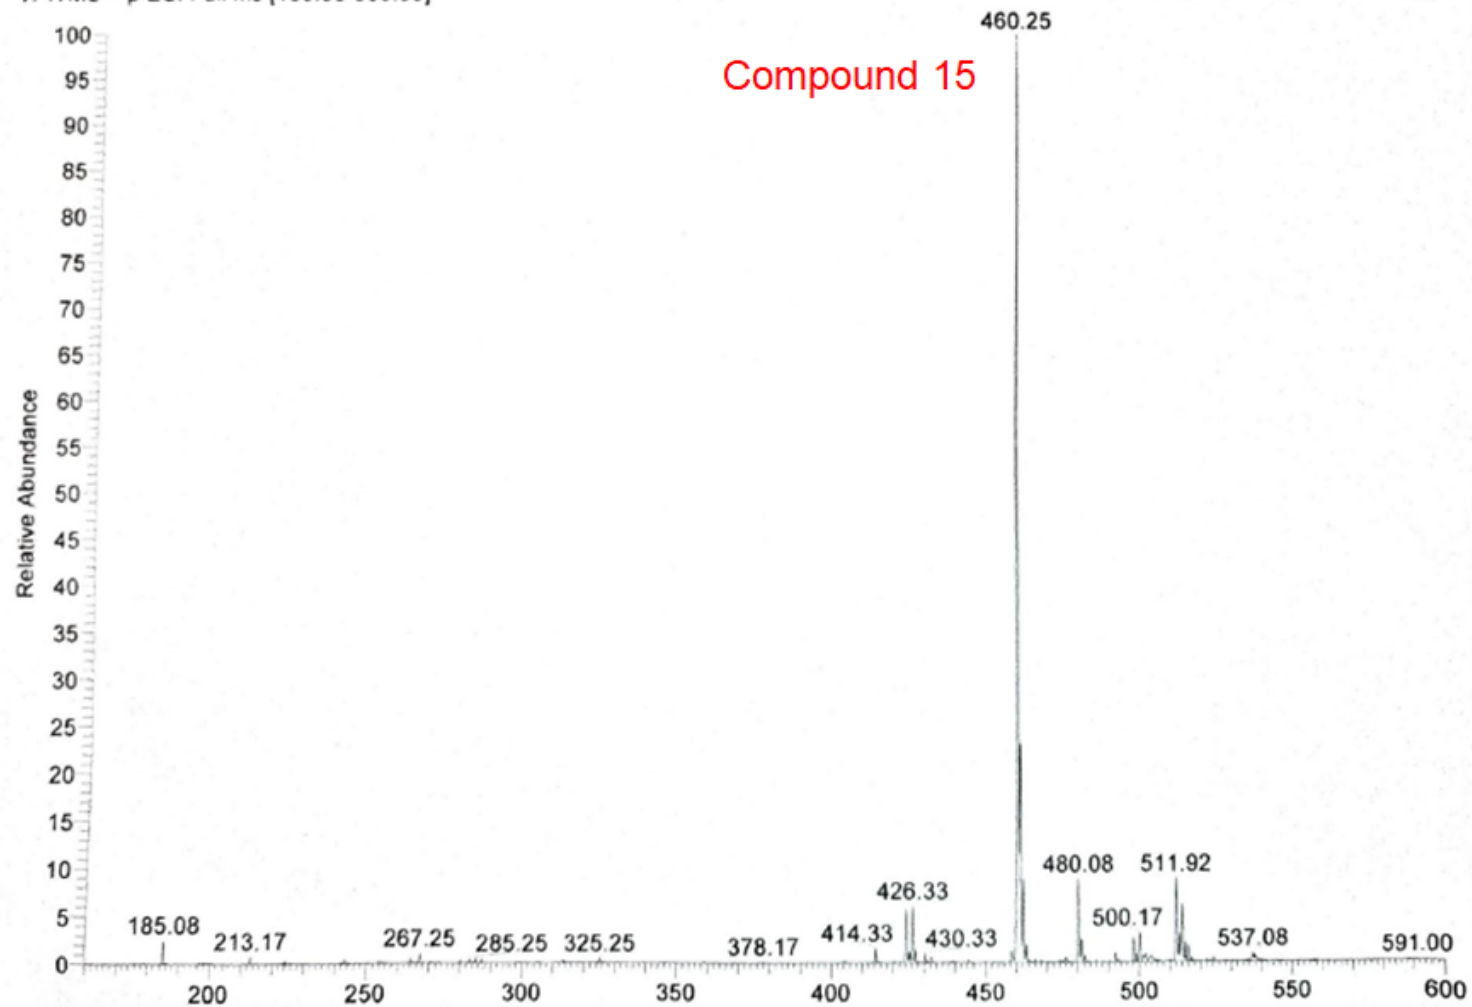

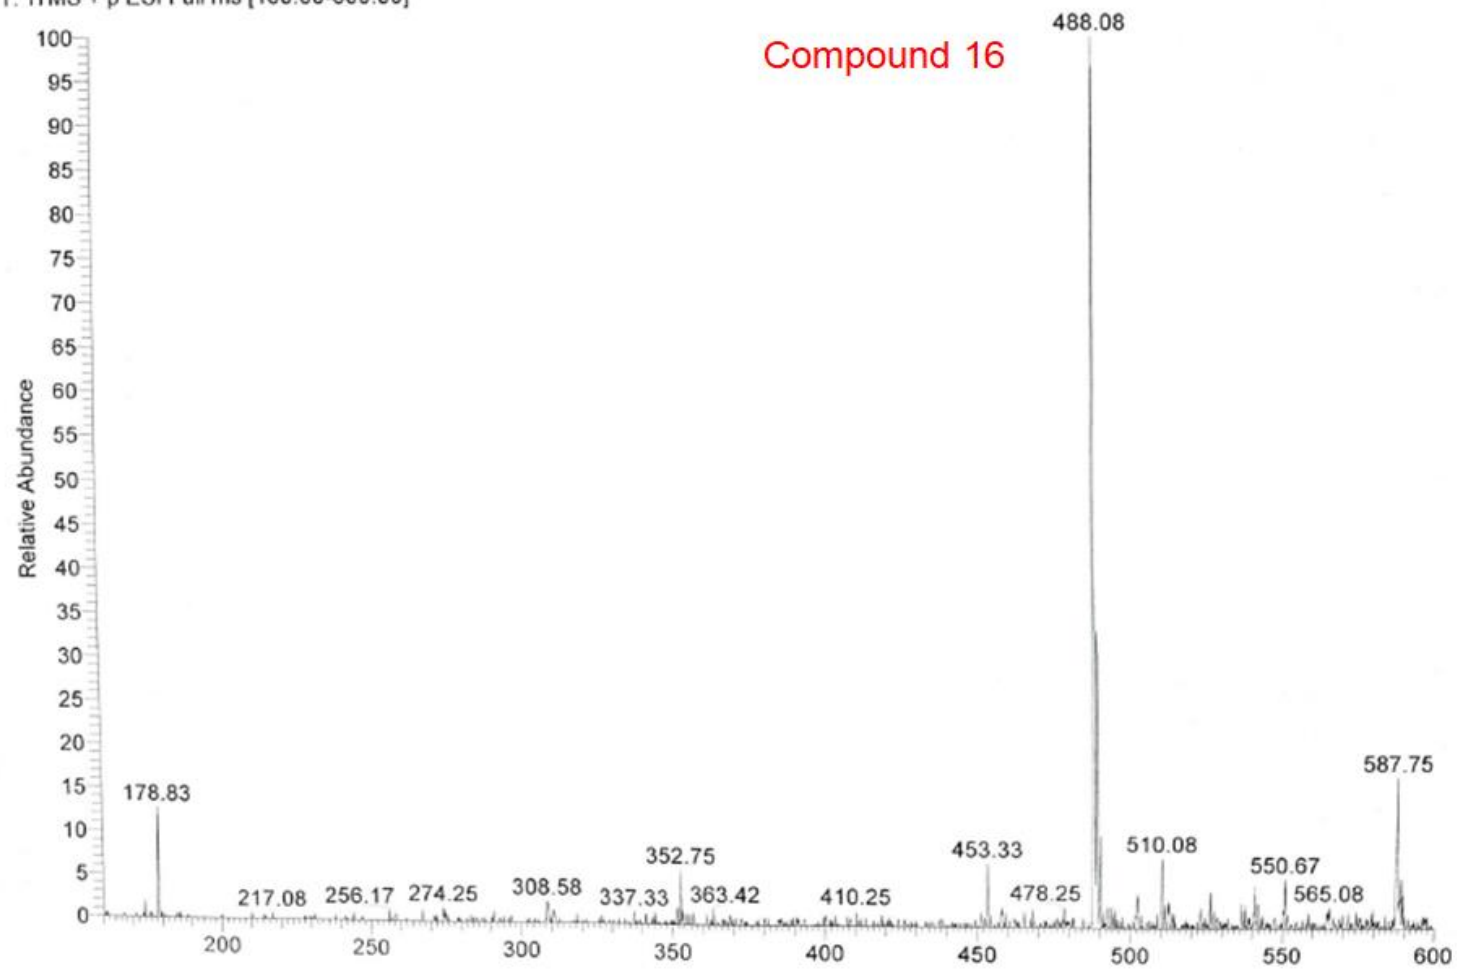

C:\Thermo\1\Dr Mahboob\_210501151026  
LCF10605

5/1/2021 3:10:26 PM

NM-11 2,4-F acetamide 455

Dr Mahboob\_210501151026 #1 RT: 0.00 AV: 1 NL: 1.80E2  
T: ITMS + p ESI Full ms [150.00-600.00]

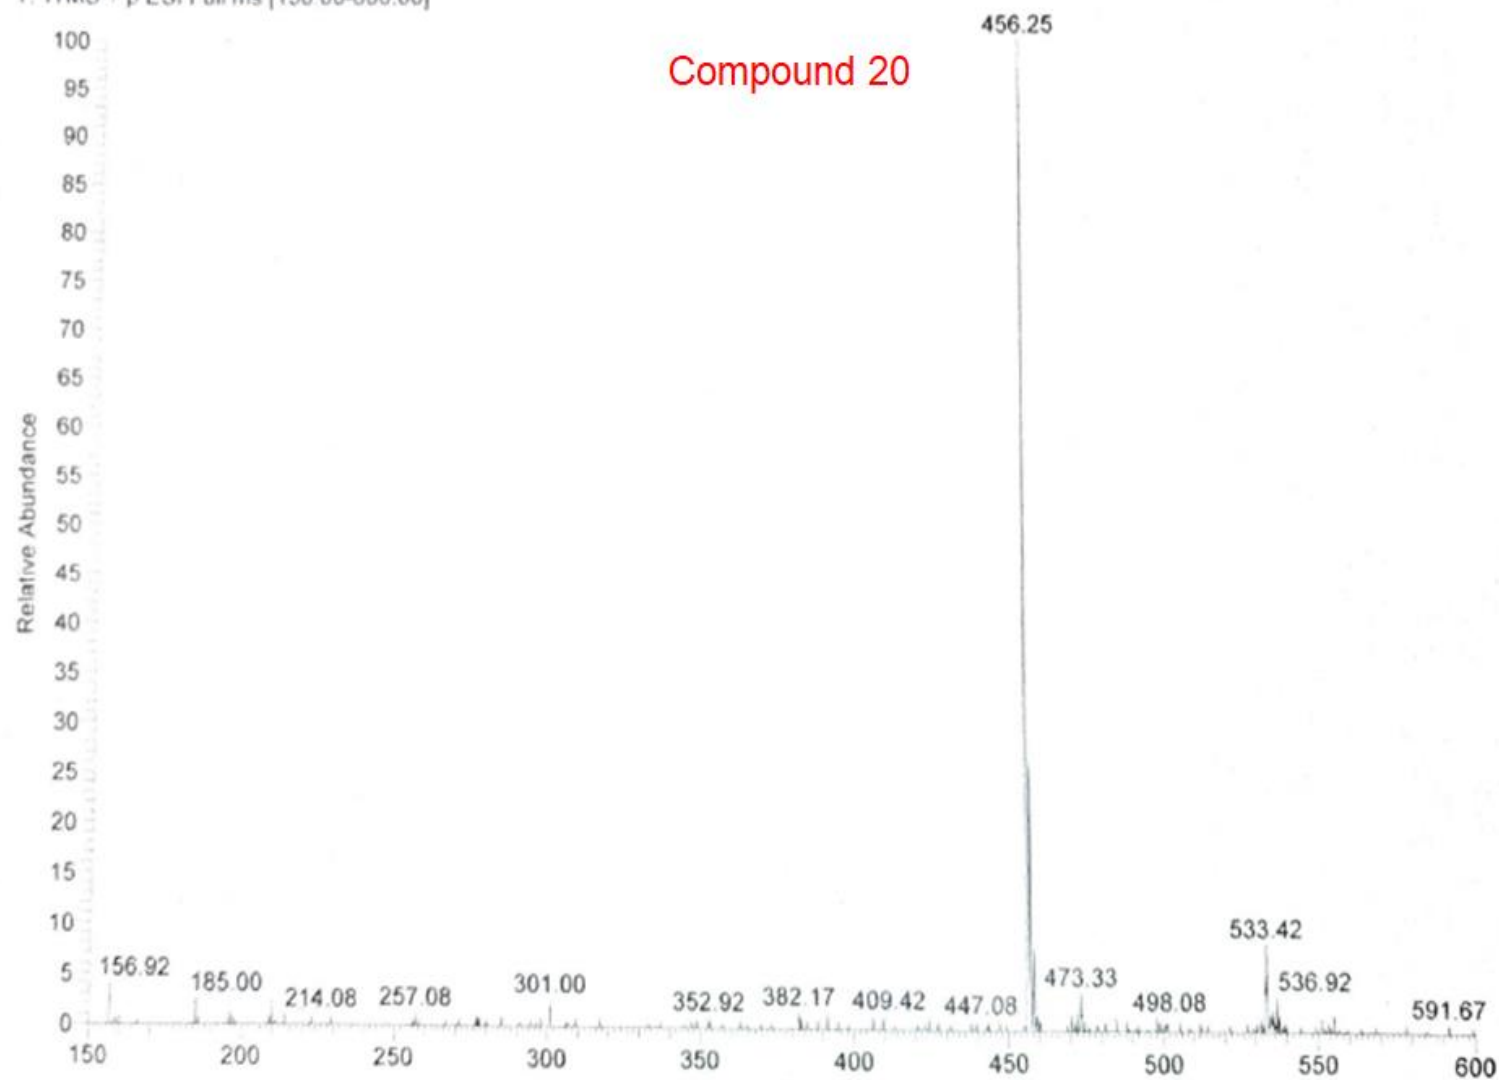

C:\Thermo\12\Dr Mahboob\_210501151545

5/1/2021 3:15:45 PM

NM-12 3-Cl acetamide 453

LCF10605

Dr Mahboob\_210501151545 #1 RT: 0.00 AV: 1 NL: 4.46E1

1 ITMS + p ESI Full ms [150.00-600.00]

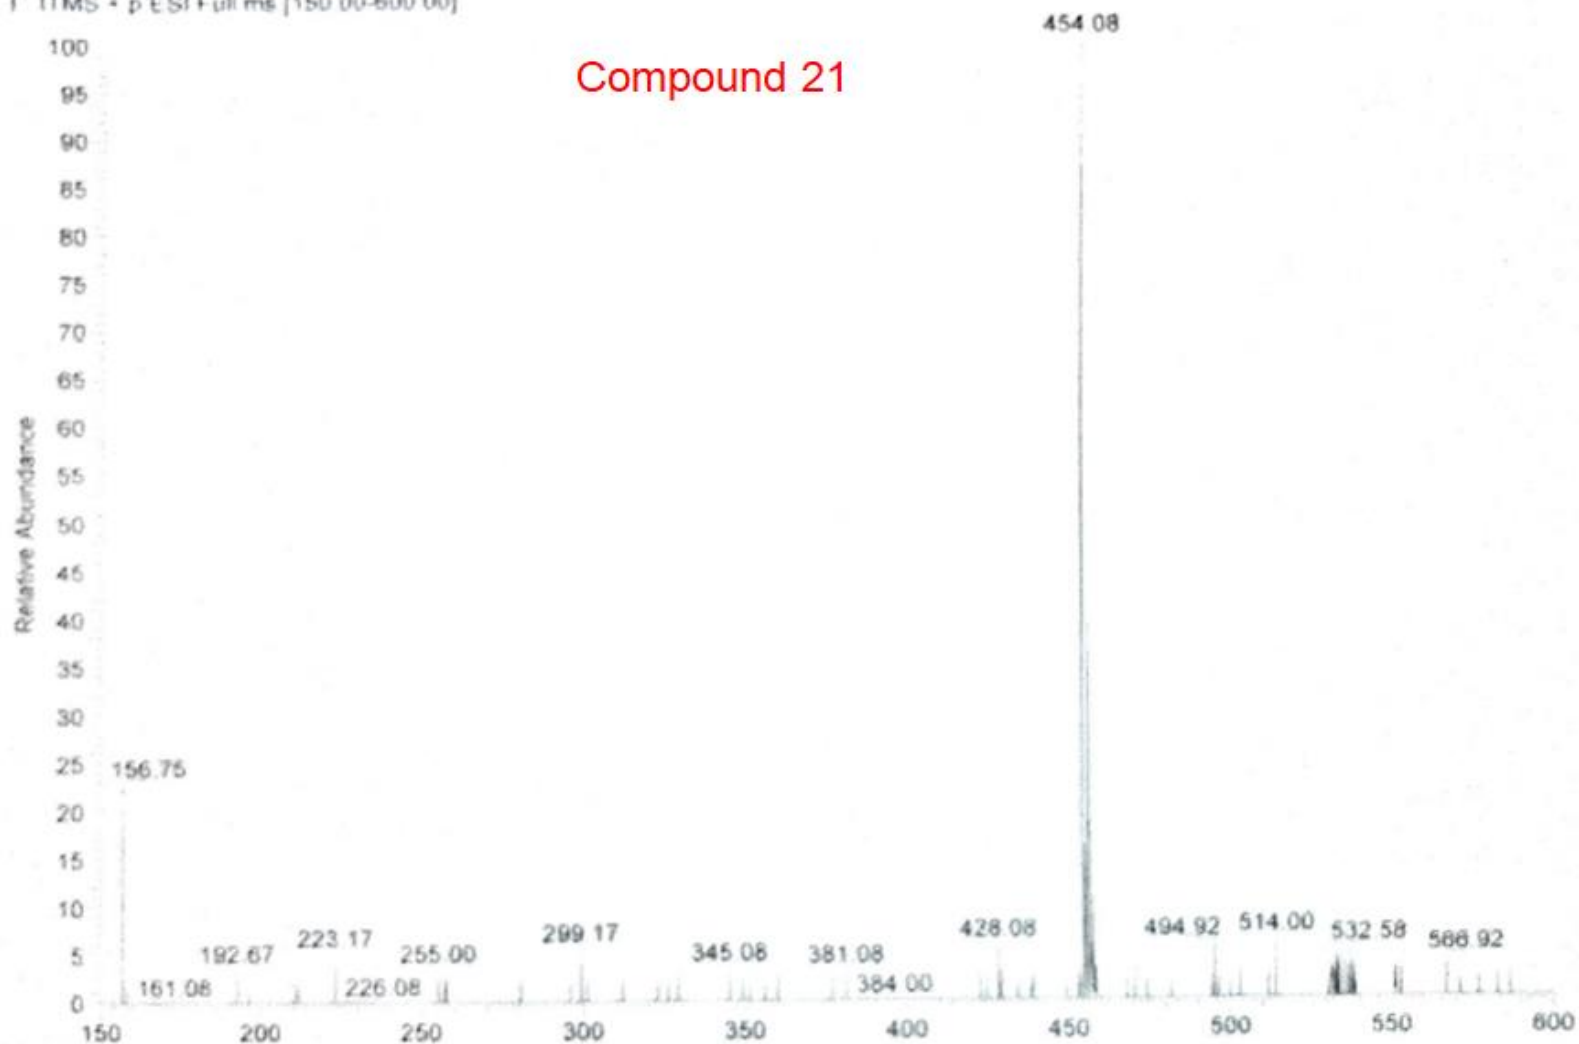



C:\Thermo\...Dr Mahboob\_210501152204  
LCF10605

5/1/2021 3:22:04 PM

NM-13 3-Bracetamide 497

Dr Mahboob\_210501152204 #1 RT: 0.00 AV: 1 NL: 5.41E1  
T: ITMS + p ESI Full ms [150.00-600.00]

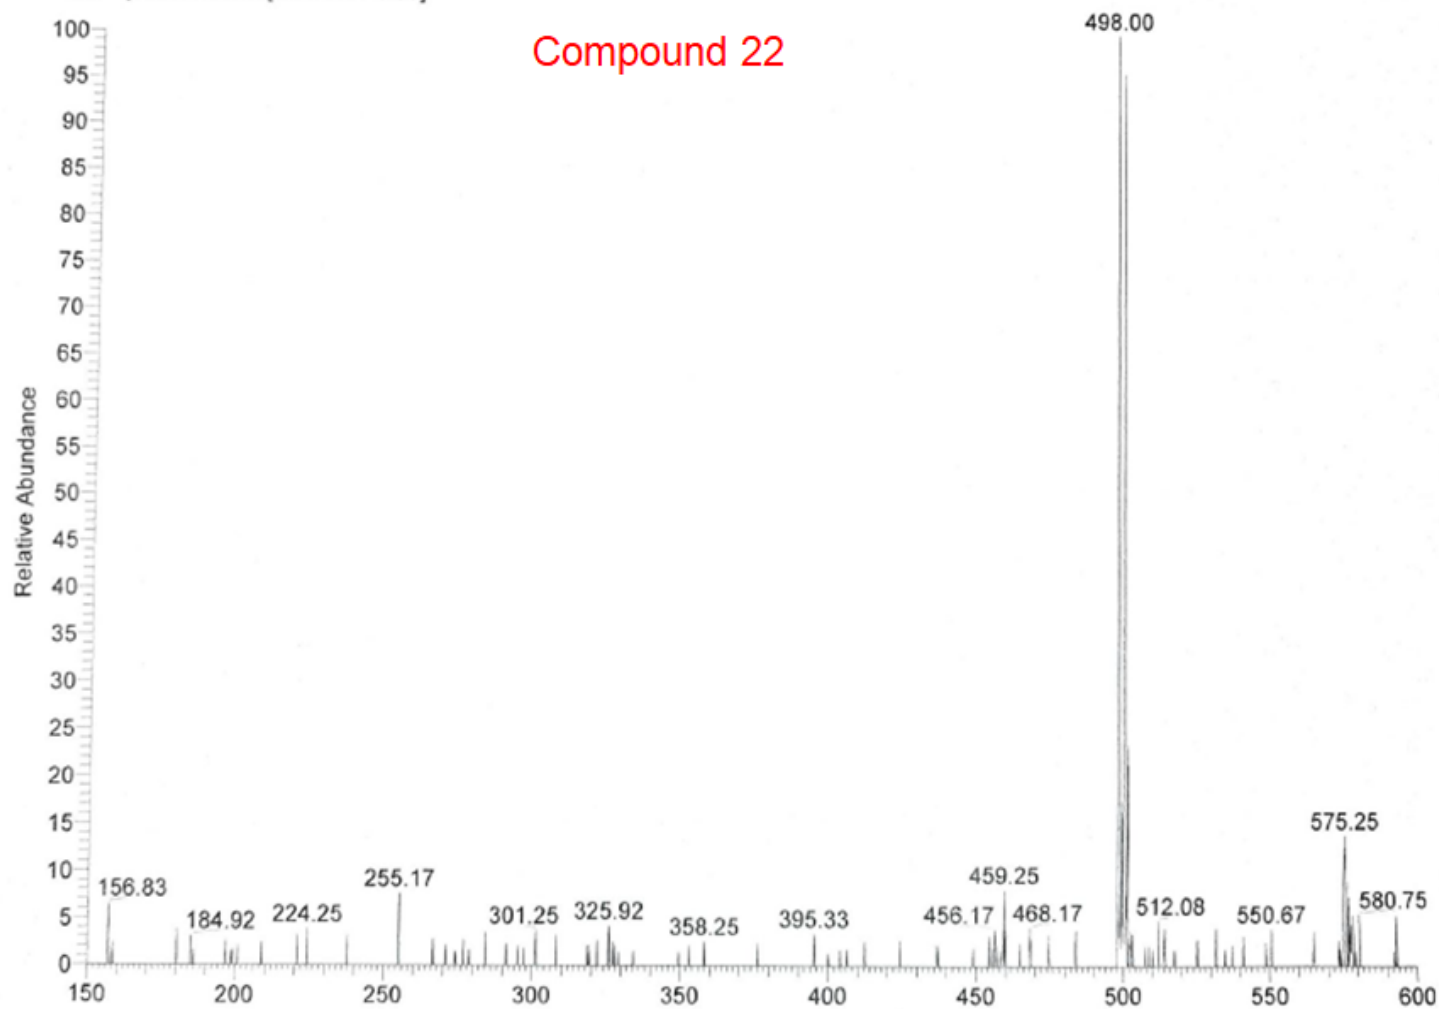

C:\Thermo\...Dr Mahboob\_210501153309  
LCF10605

5/1/2021 3:33:09 PM

NM-17 4-Br acetamide 497

Dr Mahboob\_210501153309 #1 RT: 0.00 AV: 1 NL: 7.48E1  
T: ITMS + p ESI Full ms [150.00-600.00]

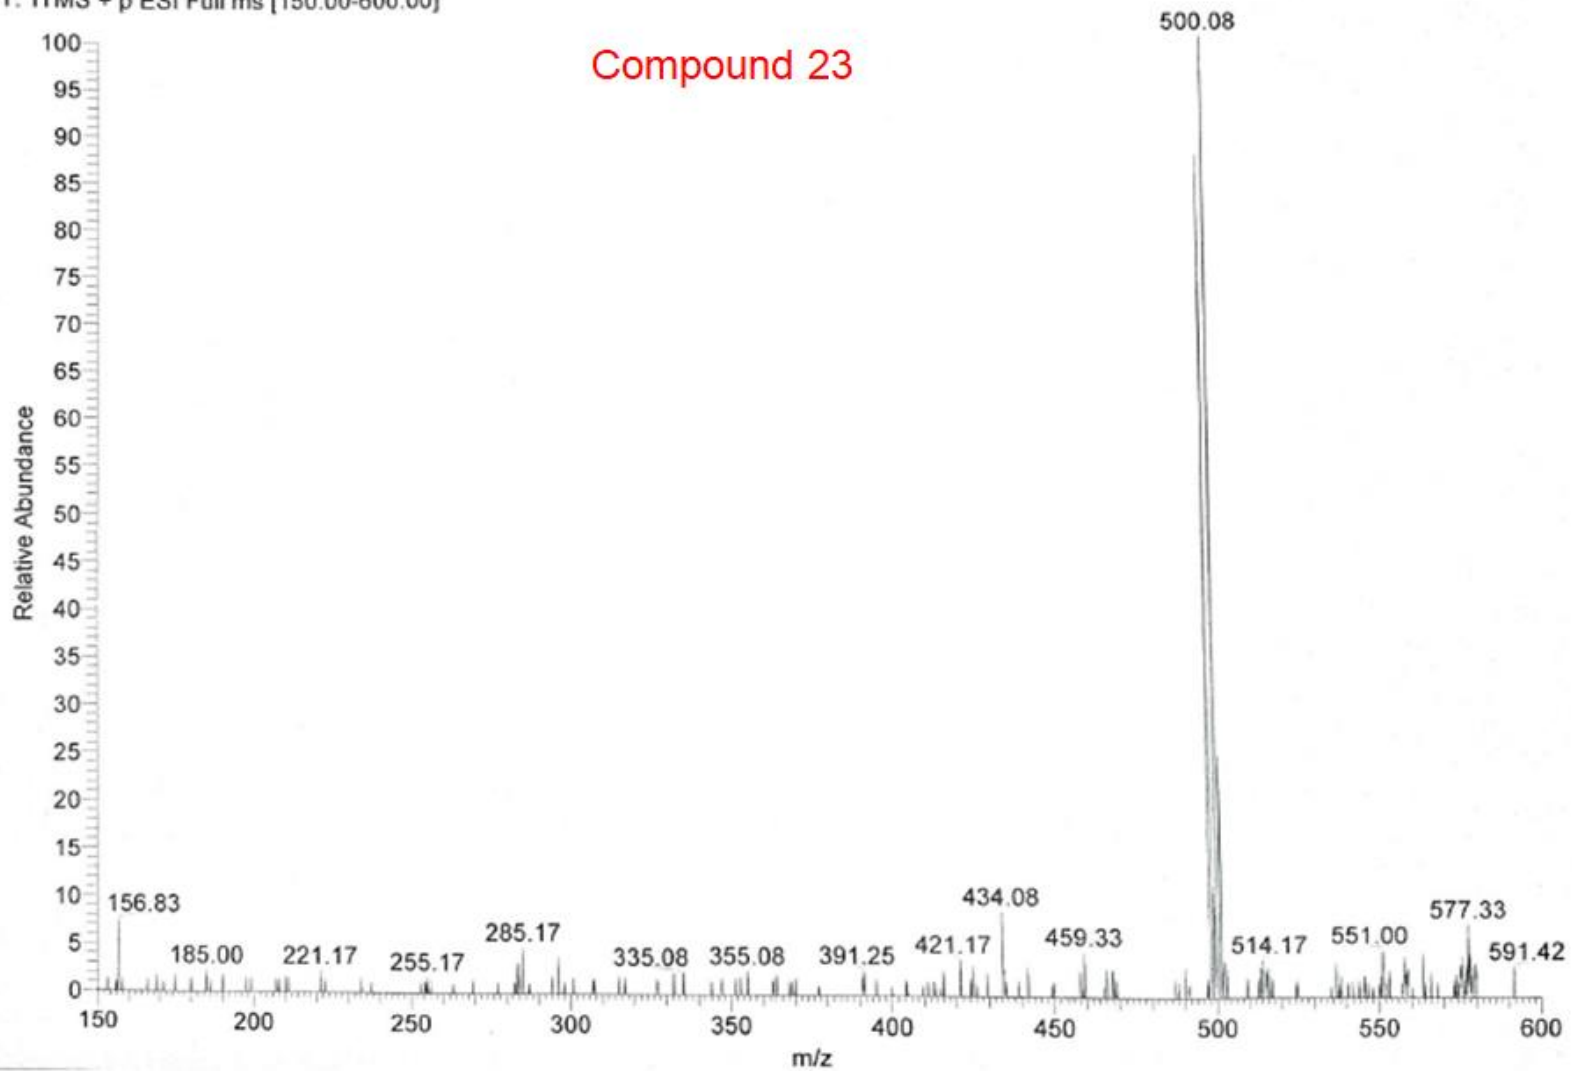

C:\Thermo\1\Dr Mahboob\_210501152838  
LCF10605

5/1/2021 3:28:38 PM

NM-16 2-Me acetamide 433

Dr Mahboob\_210501152838 #1 RT: 0.00 AV: 1 NL: 2.80E2

T: ITMS + p ESI Full ms [150.00-600.00]

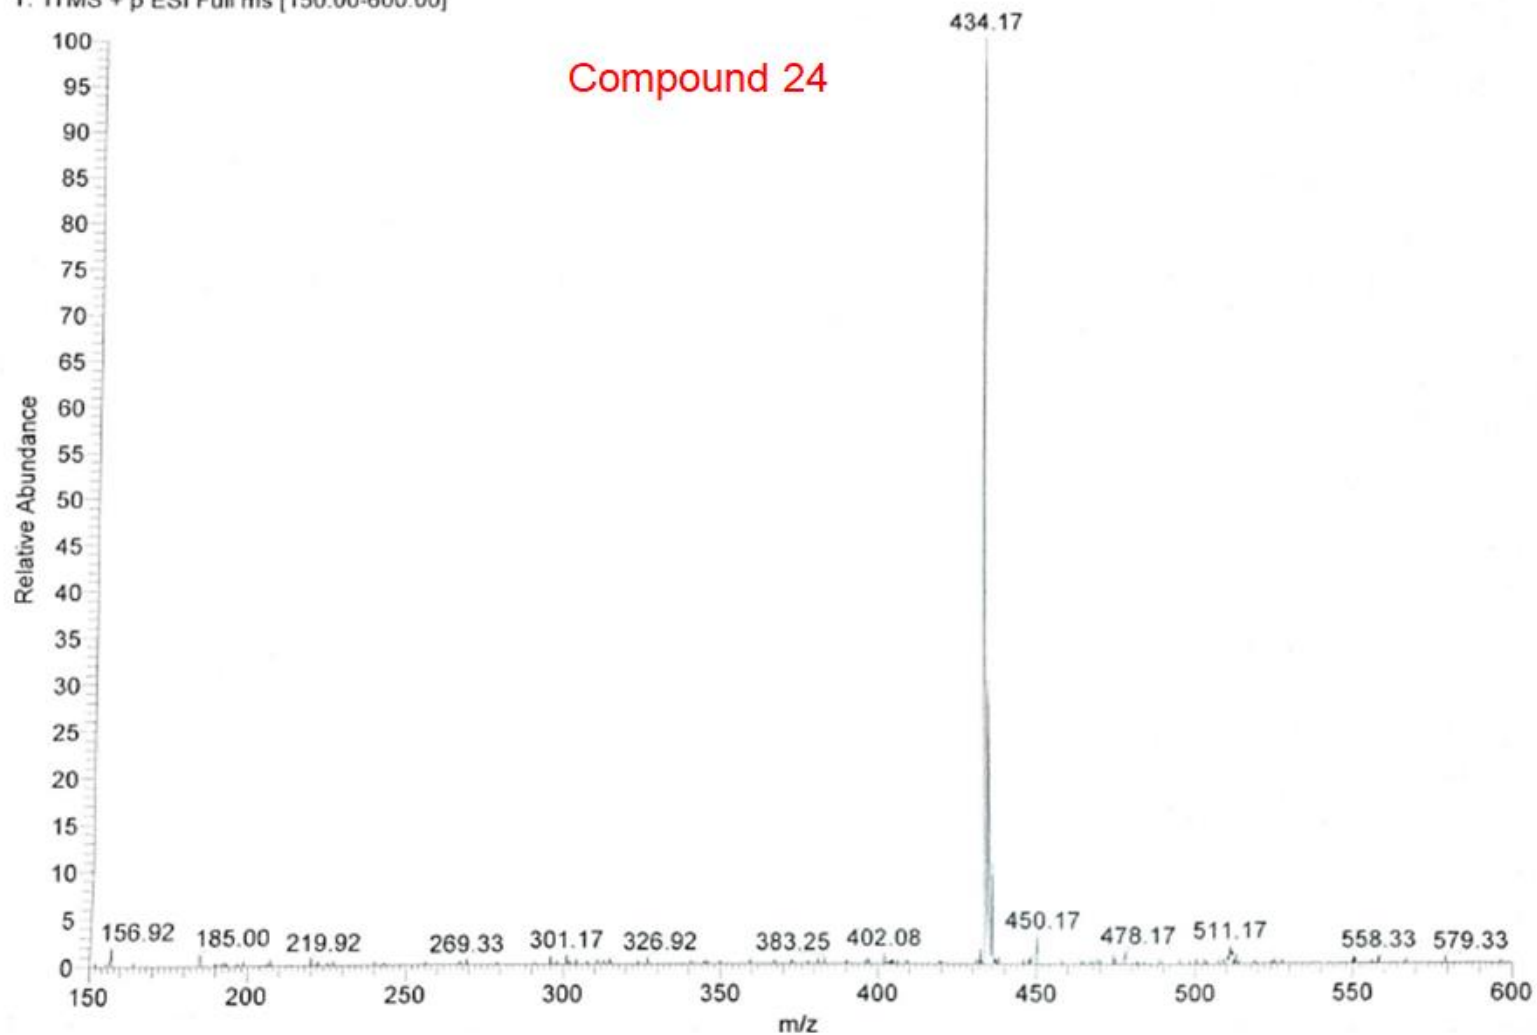

C:\Thermo\Dr Mahboob\_210501153859  
LCF10605

5/12/2021 3:38:56 PM

NM-15: 2-COOH acetamide 463

Dr Mahboob\_210501153859 #1 RT: 0.00 AV: 1 NL: 3.27E1

T: ITMS + p ESI Full ms [150.00-600.00]

Compound 25

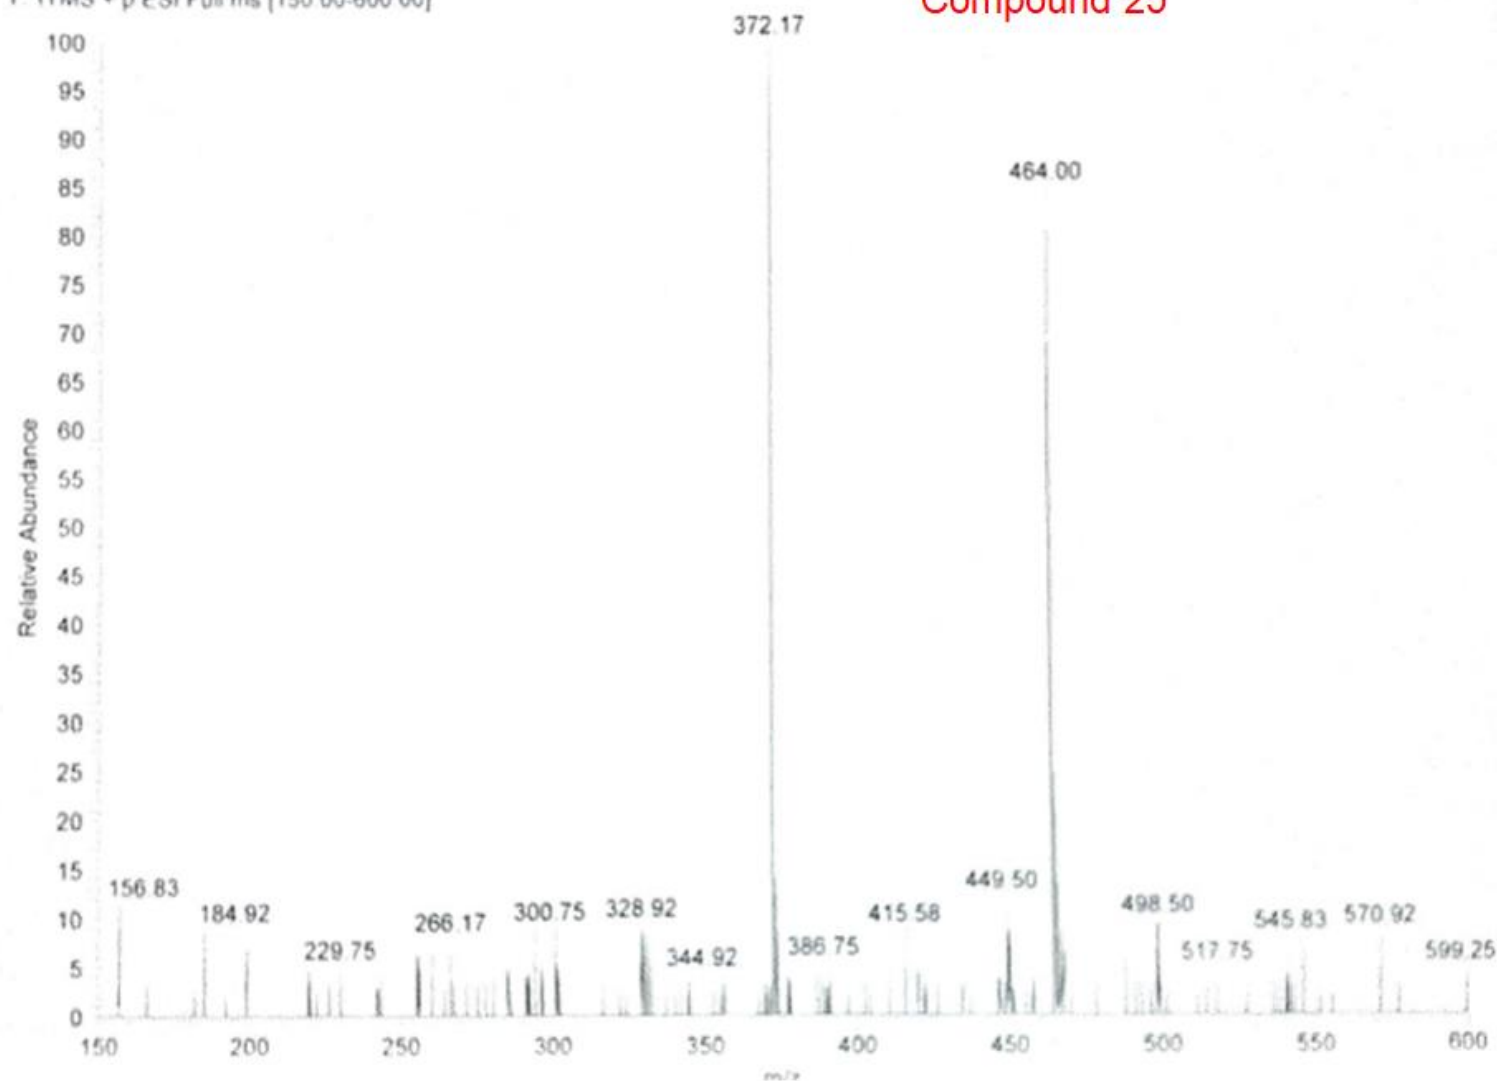

LCF10605

Dr Mahboob\_210318153646 #1 RT: 0.00 AV: 1 NL: 8.96E2

T: ITMS + p ESI Full ms [150.00-600.00]

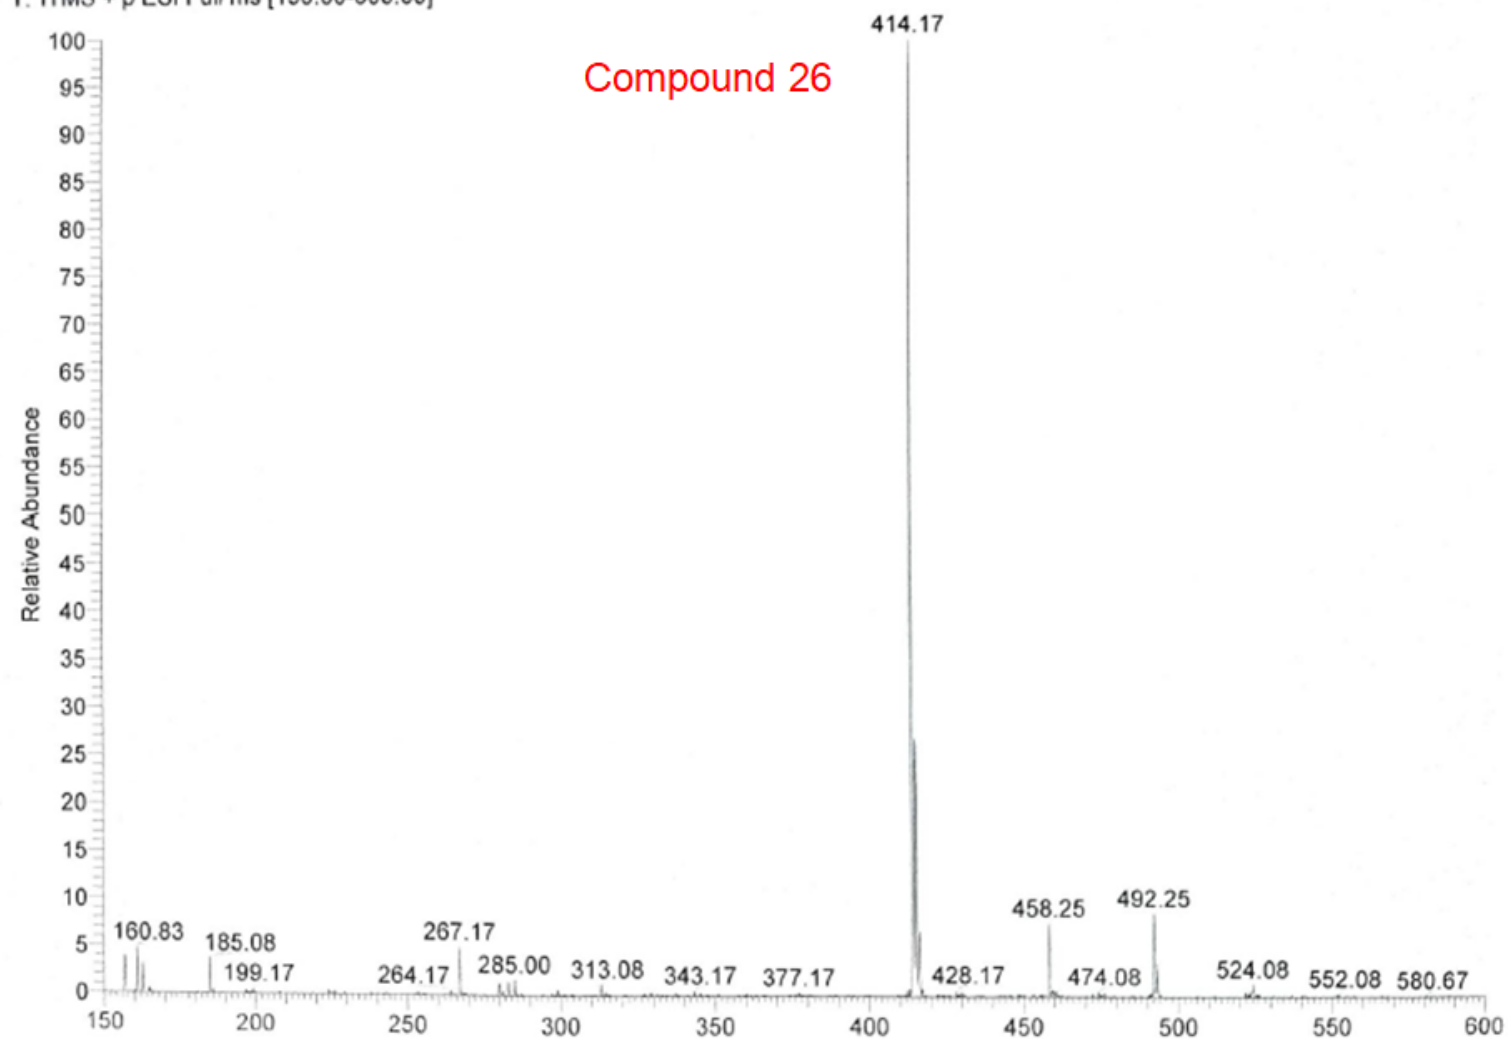

ALIE is represented as sum  $E_{orbitals}$  weighted by the orbital densities (supplementary material) according equation:

$$(I(r) = \sum_i \frac{p_i(\vec{r}) |\epsilon_i|}{p(\vec{r})}). \text{ Where } I(r) = \sum_i \frac{p_i(\vec{r}) |\epsilon_i|}{p(\vec{r})} \text{ where } p_i(\vec{r}) \text{ :is electronic cloud for the orbital (i) at the exact point } (\vec{r}), |\epsilon_i| :$$

is energy orbital and  $p(\vec{r})$ : reflecting the summation electronic density function.
